# Supplementary material for: Chromatin environment, transcriptional regulation, and splicing distinguish lincRNAs and mRNAs
Source: HighWire-hosted journal article supplement (doi:10.1101/gr.214205.116), 2016-12-07
Supplement: Supplemental_Table_S12.xlsx [file Supplemental_Table_S12.xlsx]

## Sheet: TFs
Cell	Antibody	Lab	URL
A549	ATF3	HudsonAlpha	http://hgdownload.cse.ucsc.edu/goldenPath/hg19/encodeDCC/wgEncodeAwgTfbsUniform/wgEncodeAwgTfbsHaibA549Atf3V0422111Etoh02UniPk.narrowPeak.gz
A549	BCL3	HudsonAlpha	http://hgdownload.cse.ucsc.edu/goldenPath/hg19/encodeDCC/wgEncodeAwgTfbsUniform/wgEncodeAwgTfbsHaibA549Bcl3V0422111Etoh02UniPk.narrowPeak.gz
A549	BHLHE40	Stanford	http://hgdownload.cse.ucsc.edu/goldenPath/hg19/encodeDCC/wgEncodeAwgTfbsUniform/wgEncodeAwgTfbsSydhA549Bhlhe40IggrabUniPk.narrowPeak.gz
A549	CEBPB	Stanford	http://hgdownload.cse.ucsc.edu/goldenPath/hg19/encodeDCC/wgEncodeAwgTfbsUniform/wgEncodeAwgTfbsSydhA549CebpbIggrabUniPk.narrowPeak.gz
A549	CREB1	HudsonAlpha	http://hgdownload.cse.ucsc.edu/goldenPath/hg19/encodeDCC/wgEncodeAwgTfbsUniform/wgEncodeAwgTfbsHaibA549Creb1sc240V0416102Dex100nmUniPk.narrowPeak.gz
A549	CTCF	HudsonAlpha	http://hgdownload.cse.ucsc.edu/goldenPath/hg19/encodeDCC/wgEncodeAwgTfbsUniform/wgEncodeAwgTfbsHaibA549Ctcfsc5916Pcr1xDex100nmUniPk.narrowPeak.gz
A549	CTCF	HudsonAlpha	http://hgdownload.cse.ucsc.edu/goldenPath/hg19/encodeDCC/wgEncodeAwgTfbsUniform/wgEncodeAwgTfbsHaibA549Ctcfsc5916Pcr1xEtoh02UniPk.narrowPeak.gz
A549	CTCF	UT-A	http://hgdownload.cse.ucsc.edu/goldenPath/hg19/encodeDCC/wgEncodeAwgTfbsUniform/wgEncodeAwgTfbsUtaA549CtcfUniPk.narrowPeak.gz
A549	CTCF	UW	http://hgdownload.cse.ucsc.edu/goldenPath/hg19/encodeDCC/wgEncodeAwgTfbsUniform/wgEncodeAwgTfbsUwA549CtcfUniPk.narrowPeak.gz
A549	ELF1	HudsonAlpha	http://hgdownload.cse.ucsc.edu/goldenPath/hg19/encodeDCC/wgEncodeAwgTfbsUniform/wgEncodeAwgTfbsHaibA549Elf1V0422111Etoh02UniPk.narrowPeak.gz
A549	EP300	HudsonAlpha	http://hgdownload.cse.ucsc.edu/goldenPath/hg19/encodeDCC/wgEncodeAwgTfbsUniform/wgEncodeAwgTfbsHaibA549P300V0422111Etoh02UniPk.narrowPeak.gz
A549	ETS1	HudsonAlpha	http://hgdownload.cse.ucsc.edu/goldenPath/hg19/encodeDCC/wgEncodeAwgTfbsUniform/wgEncodeAwgTfbsHaibA549Ets1V0422111Etoh02UniPk.narrowPeak.gz
A549	FOSL2	HudsonAlpha	http://hgdownload.cse.ucsc.edu/goldenPath/hg19/encodeDCC/wgEncodeAwgTfbsUniform/wgEncodeAwgTfbsHaibA549Fosl2V0422111Etoh02UniPk.narrowPeak.gz
A549	FOXA1	HudsonAlpha	http://hgdownload.cse.ucsc.edu/goldenPath/hg19/encodeDCC/wgEncodeAwgTfbsUniform/wgEncodeAwgTfbsHaibA549Foxa1V0416102Dex100nmUniPk.narrowPeak.gz
A549	GABPA	HudsonAlpha	http://hgdownload.cse.ucsc.edu/goldenPath/hg19/encodeDCC/wgEncodeAwgTfbsUniform/wgEncodeAwgTfbsHaibA549GabpV0422111Etoh02UniPk.narrowPeak.gz
A549	MAX	Stanford	http://hgdownload.cse.ucsc.edu/goldenPath/hg19/encodeDCC/wgEncodeAwgTfbsUniform/wgEncodeAwgTfbsSydhA549MaxIggrabUniPk.narrowPeak.gz
A549	NR3C1	HudsonAlpha	http://hgdownload.cse.ucsc.edu/goldenPath/hg19/encodeDCC/wgEncodeAwgTfbsUniform/wgEncodeAwgTfbsHaibA549GrPcr1xDex500pmUniPk.narrowPeak.gz
A549	NR3C1	HudsonAlpha	http://hgdownload.cse.ucsc.edu/goldenPath/hg19/encodeDCC/wgEncodeAwgTfbsUniform/wgEncodeAwgTfbsHaibA549GrPcr1xDex50nmUniPk.narrowPeak.gz
A549	NR3C1	HudsonAlpha	http://hgdownload.cse.ucsc.edu/goldenPath/hg19/encodeDCC/wgEncodeAwgTfbsUniform/wgEncodeAwgTfbsHaibA549GrPcr1xDex5nmUniPk.narrowPeak.gz
A549	NR3C1	HudsonAlpha	http://hgdownload.cse.ucsc.edu/goldenPath/hg19/encodeDCC/wgEncodeAwgTfbsUniform/wgEncodeAwgTfbsHaibA549GrPcr2xDex100nmUniPk.narrowPeak.gz
A549	POLR2A	HudsonAlpha	http://hgdownload.cse.ucsc.edu/goldenPath/hg19/encodeDCC/wgEncodeAwgTfbsUniform/wgEncodeAwgTfbsHaibA549Pol2Pcr2xDex100nmUniPk.narrowPeak.gz
A549	POLR2A	HudsonAlpha	http://hgdownload.cse.ucsc.edu/goldenPath/hg19/encodeDCC/wgEncodeAwgTfbsUniform/wgEncodeAwgTfbsHaibA549Pol2Pcr2xEtoh02UniPk.narrowPeak.gz
A549	POLR2A	Stanford	http://hgdownload.cse.ucsc.edu/goldenPath/hg19/encodeDCC/wgEncodeAwgTfbsUniform/wgEncodeAwgTfbsSydhA549Pol2s2IggrabUniPk.narrowPeak.gz
A549	POLR2A	UT-A	http://hgdownload.cse.ucsc.edu/goldenPath/hg19/encodeDCC/wgEncodeAwgTfbsUniform/wgEncodeAwgTfbsUtaA549Pol2UniPk.narrowPeak.gz
A549	RAD21	Stanford	http://hgdownload.cse.ucsc.edu/goldenPath/hg19/encodeDCC/wgEncodeAwgTfbsUniform/wgEncodeAwgTfbsSydhA549Rad21IggrabUniPk.narrowPeak.gz
A549	REST	HudsonAlpha	http://hgdownload.cse.ucsc.edu/goldenPath/hg19/encodeDCC/wgEncodeAwgTfbsUniform/wgEncodeAwgTfbsHaibA549NrsfV0422111Etoh02UniPk.narrowPeak.gz
A549	SIN3AK20	HudsonAlpha	http://hgdownload.cse.ucsc.edu/goldenPath/hg19/encodeDCC/wgEncodeAwgTfbsUniform/wgEncodeAwgTfbsHaibA549Sin3ak20V0422111Etoh02UniPk.narrowPeak.gz
A549	SIX5	HudsonAlpha	http://hgdownload.cse.ucsc.edu/goldenPath/hg19/encodeDCC/wgEncodeAwgTfbsUniform/wgEncodeAwgTfbsHaibA549Six5V0422111Etoh02UniPk.narrowPeak.gz
A549	TAF1	HudsonAlpha	http://hgdownload.cse.ucsc.edu/goldenPath/hg19/encodeDCC/wgEncodeAwgTfbsUniform/wgEncodeAwgTfbsHaibA549Taf1V0422111Etoh02UniPk.narrowPeak.gz
A549	TCF12	HudsonAlpha	http://hgdownload.cse.ucsc.edu/goldenPath/hg19/encodeDCC/wgEncodeAwgTfbsUniform/wgEncodeAwgTfbsHaibA549Tcf12V0422111Etoh02UniPk.narrowPeak.gz
A549	USF1	HudsonAlpha	http://hgdownload.cse.ucsc.edu/goldenPath/hg19/encodeDCC/wgEncodeAwgTfbsUniform/wgEncodeAwgTfbsHaibA549Usf1Pcr1xDex100nmUniPk.narrowPeak.gz
A549	USF1	HudsonAlpha	http://hgdownload.cse.ucsc.edu/goldenPath/hg19/encodeDCC/wgEncodeAwgTfbsUniform/wgEncodeAwgTfbsHaibA549Usf1Pcr1xEtoh02UniPk.narrowPeak.gz
A549	USF1	HudsonAlpha	http://hgdownload.cse.ucsc.edu/goldenPath/hg19/encodeDCC/wgEncodeAwgTfbsUniform/wgEncodeAwgTfbsHaibA549Usf1V0422111Etoh02UniPk.narrowPeak.gz
A549	YY1	HudsonAlpha	http://hgdownload.cse.ucsc.edu/goldenPath/hg19/encodeDCC/wgEncodeAwgTfbsUniform/wgEncodeAwgTfbsHaibA549Yy1cV0422111Etoh02UniPk.narrowPeak.gz
A549	ZBTB33	HudsonAlpha	http://hgdownload.cse.ucsc.edu/goldenPath/hg19/encodeDCC/wgEncodeAwgTfbsUniform/wgEncodeAwgTfbsHaibA549Zbtb33V0422111Etoh02UniPk.narrowPeak.gz
AG04449	CTCF	UW	http://hgdownload.cse.ucsc.edu/goldenPath/hg19/encodeDCC/wgEncodeAwgTfbsUniform/wgEncodeAwgTfbsUwAg04449CtcfUniPk.narrowPeak.gz
AG04450	CTCF	UW	http://hgdownload.cse.ucsc.edu/goldenPath/hg19/encodeDCC/wgEncodeAwgTfbsUniform/wgEncodeAwgTfbsUwAg04450CtcfUniPk.narrowPeak.gz
AG09309	CTCF	UW	http://hgdownload.cse.ucsc.edu/goldenPath/hg19/encodeDCC/wgEncodeAwgTfbsUniform/wgEncodeAwgTfbsUwAg09309CtcfUniPk.narrowPeak.gz
AG09319	CTCF	UW	http://hgdownload.cse.ucsc.edu/goldenPath/hg19/encodeDCC/wgEncodeAwgTfbsUniform/wgEncodeAwgTfbsUwAg09319CtcfUniPk.narrowPeak.gz
AG10803	CTCF	UW	http://hgdownload.cse.ucsc.edu/goldenPath/hg19/encodeDCC/wgEncodeAwgTfbsUniform/wgEncodeAwgTfbsUwAg10803CtcfUniPk.narrowPeak.gz
AoAF	CTCF	UW	http://hgdownload.cse.ucsc.edu/goldenPath/hg19/encodeDCC/wgEncodeAwgTfbsUniform/wgEncodeAwgTfbsUwAoafCtcfUniPk.narrowPeak.gz
BE2_C	CTCF	UW	http://hgdownload.cse.ucsc.edu/goldenPath/hg19/encodeDCC/wgEncodeAwgTfbsUniform/wgEncodeAwgTfbsUwBe2cCtcfUniPk.narrowPeak.gz
BJ	CTCF	UW	http://hgdownload.cse.ucsc.edu/goldenPath/hg19/encodeDCC/wgEncodeAwgTfbsUniform/wgEncodeAwgTfbsUwBjCtcfUniPk.narrowPeak.gz
Caco-2	CTCF	UW	http://hgdownload.cse.ucsc.edu/goldenPath/hg19/encodeDCC/wgEncodeAwgTfbsUniform/wgEncodeAwgTfbsUwCaco2CtcfUniPk.narrowPeak.gz
Dnd41	CTCF	Broad	http://hgdownload.cse.ucsc.edu/goldenPath/hg19/encodeDCC/wgEncodeAwgTfbsUniform/wgEncodeAwgTfbsBroadDnd41CtcfUniPk.narrowPeak.gz
Dnd41	EZH2	Broad	http://hgdownload.cse.ucsc.edu/goldenPath/hg19/encodeDCC/wgEncodeAwgTfbsUniform/wgEncodeAwgTfbsBroadDnd41Ezh239875UniPk.narrowPeak.gz
ECC-1	CTCF	HudsonAlpha	http://hgdownload.cse.ucsc.edu/goldenPath/hg19/encodeDCC/wgEncodeAwgTfbsUniform/wgEncodeAwgTfbsHaibEcc1CtcfcV0416102Dm002p1hUniPk.narrowPeak.gz
ECC-1	ESR1	HudsonAlpha	http://hgdownload.cse.ucsc.edu/goldenPath/hg19/encodeDCC/wgEncodeAwgTfbsUniform/wgEncodeAwgTfbsHaibEcc1EraaV0416102Bpa1hUniPk.narrowPeak.gz
ECC-1	ESR1	HudsonAlpha	http://hgdownload.cse.ucsc.edu/goldenPath/hg19/encodeDCC/wgEncodeAwgTfbsUniform/wgEncodeAwgTfbsHaibEcc1EralphaaV0416102Est10nm1hUniPk.narrowPeak.gz
ECC-1	ESR1	HudsonAlpha	http://hgdownload.cse.ucsc.edu/goldenPath/hg19/encodeDCC/wgEncodeAwgTfbsUniform/wgEncodeAwgTfbsHaibEcc1EralphaaV0416102Gen1hUniPk.narrowPeak.gz
ECC-1	FOXA1	HudsonAlpha	http://hgdownload.cse.ucsc.edu/goldenPath/hg19/encodeDCC/wgEncodeAwgTfbsUniform/wgEncodeAwgTfbsHaibEcc1Foxa1sc6553V0416102Dm002p1hUniPk.narrowPeak.gz
ECC-1	NR3C1	HudsonAlpha	http://hgdownload.cse.ucsc.edu/goldenPath/hg19/encodeDCC/wgEncodeAwgTfbsUniform/wgEncodeAwgTfbsHaibEcc1GrV0416102Dex100nmUniPk.narrowPeak.gz
ECC-1	POLR2A	HudsonAlpha	http://hgdownload.cse.ucsc.edu/goldenPath/hg19/encodeDCC/wgEncodeAwgTfbsUniform/wgEncodeAwgTfbsHaibEcc1Pol2V0416102Dm002p1hUniPk.narrowPeak.gz
Fibrobl	CTCF	UT-A	http://hgdownload.cse.ucsc.edu/goldenPath/hg19/encodeDCC/wgEncodeAwgTfbsUniform/wgEncodeAwgTfbsUtaFibroblCtcfUniPk.narrowPeak.gz
Gliobla	CTCF	UT-A	http://hgdownload.cse.ucsc.edu/goldenPath/hg19/encodeDCC/wgEncodeAwgTfbsUniform/wgEncodeAwgTfbsUtaGlioblaCtcfUniPk.narrowPeak.gz
Gliobla	POLR2A	UT-A	http://hgdownload.cse.ucsc.edu/goldenPath/hg19/encodeDCC/wgEncodeAwgTfbsUniform/wgEncodeAwgTfbsUtaGlioblaPol2UniPk.narrowPeak.gz
GM06990	CTCF	UW	http://hgdownload.cse.ucsc.edu/goldenPath/hg19/encodeDCC/wgEncodeAwgTfbsUniform/wgEncodeAwgTfbsUwGm06990CtcfUniPk.narrowPeak.gz
GM08714	ZNF274	USC	http://hgdownload.cse.ucsc.edu/goldenPath/hg19/encodeDCC/wgEncodeAwgTfbsUniform/wgEncodeAwgTfbsSydhGm08714Znf274UcdUniPk.narrowPeak.gz
GM10847	POLR2A	Stanford	http://hgdownload.cse.ucsc.edu/goldenPath/hg19/encodeDCC/wgEncodeAwgTfbsUniform/wgEncodeAwgTfbsSydhGm10847Pol2IggmusUniPk.narrowPeak.gz
GM10847	RELA	Stanford	http://hgdownload.cse.ucsc.edu/goldenPath/hg19/encodeDCC/wgEncodeAwgTfbsUniform/wgEncodeAwgTfbsSydhGm10847NfkbTnfaIggrabUniPk.narrowPeak.gz
GM12801	CTCF	UW	http://hgdownload.cse.ucsc.edu/goldenPath/hg19/encodeDCC/wgEncodeAwgTfbsUniform/wgEncodeAwgTfbsUwGm12801CtcfUniPk.narrowPeak.gz
GM12864	CTCF	UW	http://hgdownload.cse.ucsc.edu/goldenPath/hg19/encodeDCC/wgEncodeAwgTfbsUniform/wgEncodeAwgTfbsUwGm12864CtcfUniPk.narrowPeak.gz
GM12865	CTCF	UW	http://hgdownload.cse.ucsc.edu/goldenPath/hg19/encodeDCC/wgEncodeAwgTfbsUniform/wgEncodeAwgTfbsUwGm12865CtcfUniPk.narrowPeak.gz
GM12872	CTCF	UW	http://hgdownload.cse.ucsc.edu/goldenPath/hg19/encodeDCC/wgEncodeAwgTfbsUniform/wgEncodeAwgTfbsUwGm12872CtcfUniPk.narrowPeak.gz
GM12873	CTCF	UW	http://hgdownload.cse.ucsc.edu/goldenPath/hg19/encodeDCC/wgEncodeAwgTfbsUniform/wgEncodeAwgTfbsUwGm12873CtcfUniPk.narrowPeak.gz
GM12874	CTCF	UW	http://hgdownload.cse.ucsc.edu/goldenPath/hg19/encodeDCC/wgEncodeAwgTfbsUniform/wgEncodeAwgTfbsUwGm12874CtcfUniPk.narrowPeak.gz
GM12875	CTCF	UW	http://hgdownload.cse.ucsc.edu/goldenPath/hg19/encodeDCC/wgEncodeAwgTfbsUniform/wgEncodeAwgTfbsUwGm12875CtcfUniPk.narrowPeak.gz
GM12878	ATF2	HudsonAlpha	http://hgdownload.cse.ucsc.edu/goldenPath/hg19/encodeDCC/wgEncodeAwgTfbsUniform/wgEncodeAwgTfbsHaibGm12878Atf2sc81188V0422111UniPk.narrowPeak.gz
GM12878	ATF3	HudsonAlpha	http://hgdownload.cse.ucsc.edu/goldenPath/hg19/encodeDCC/wgEncodeAwgTfbsUniform/wgEncodeAwgTfbsHaibGm12878Atf3Pcr1xUniPk.narrowPeak.gz
GM12878	BATF	HudsonAlpha	http://hgdownload.cse.ucsc.edu/goldenPath/hg19/encodeDCC/wgEncodeAwgTfbsUniform/wgEncodeAwgTfbsHaibGm12878BatfPcr1xUniPk.narrowPeak.gz
GM12878	BCL11A	HudsonAlpha	http://hgdownload.cse.ucsc.edu/goldenPath/hg19/encodeDCC/wgEncodeAwgTfbsUniform/wgEncodeAwgTfbsHaibGm12878Bcl11aPcr1xUniPk.narrowPeak.gz
GM12878	BCL3	HudsonAlpha	http://hgdownload.cse.ucsc.edu/goldenPath/hg19/encodeDCC/wgEncodeAwgTfbsUniform/wgEncodeAwgTfbsHaibGm12878Bcl3V0416101UniPk.narrowPeak.gz
GM12878	BCLAF1	HudsonAlpha	http://hgdownload.cse.ucsc.edu/goldenPath/hg19/encodeDCC/wgEncodeAwgTfbsUniform/wgEncodeAwgTfbsHaibGm12878Bclaf101388V0416101UniPk.narrowPeak.gz
GM12878	BHLHE40	Stanford	http://hgdownload.cse.ucsc.edu/goldenPath/hg19/encodeDCC/wgEncodeAwgTfbsUniform/wgEncodeAwgTfbsSydhGm12878Bhlhe40cIggmusUniPk.narrowPeak.gz
GM12878	BRCA1	Stanford	http://hgdownload.cse.ucsc.edu/goldenPath/hg19/encodeDCC/wgEncodeAwgTfbsUniform/wgEncodeAwgTfbsSydhGm12878Brca1a300IggmusUniPk.narrowPeak.gz
GM12878	CEBPB	HudsonAlpha	http://hgdownload.cse.ucsc.edu/goldenPath/hg19/encodeDCC/wgEncodeAwgTfbsUniform/wgEncodeAwgTfbsHaibGm12878Cebpbsc150V0422111UniPk.narrowPeak.gz
GM12878	CHD1	Stanford	http://hgdownload.cse.ucsc.edu/goldenPath/hg19/encodeDCC/wgEncodeAwgTfbsUniform/wgEncodeAwgTfbsSydhGm12878Chd1a301218aIggmusUniPk.narrowPeak.gz
GM12878	CHD2	Stanford	http://hgdownload.cse.ucsc.edu/goldenPath/hg19/encodeDCC/wgEncodeAwgTfbsUniform/wgEncodeAwgTfbsSydhGm12878Chd2ab68301IggmusUniPk.narrowPeak.gz
GM12878	CTCF	Broad	http://hgdownload.cse.ucsc.edu/goldenPath/hg19/encodeDCC/wgEncodeAwgTfbsUniform/wgEncodeAwgTfbsBroadGm12878CtcfUniPk.narrowPeak.gz
GM12878	CTCF	Stanford	http://hgdownload.cse.ucsc.edu/goldenPath/hg19/encodeDCC/wgEncodeAwgTfbsUniform/wgEncodeAwgTfbsSydhGm12878Ctcfsc15914c20UniPk.narrowPeak.gz
GM12878	CTCF	UT-A	http://hgdownload.cse.ucsc.edu/goldenPath/hg19/encodeDCC/wgEncodeAwgTfbsUniform/wgEncodeAwgTfbsUtaGm12878CtcfUniPk.narrowPeak.gz
GM12878	CTCF	UW	http://hgdownload.cse.ucsc.edu/goldenPath/hg19/encodeDCC/wgEncodeAwgTfbsUniform/wgEncodeAwgTfbsUwGm12878CtcfUniPk.narrowPeak.gz
GM12878	E2F4	Stanford	http://hgdownload.cse.ucsc.edu/goldenPath/hg19/encodeDCC/wgEncodeAwgTfbsUniform/wgEncodeAwgTfbsSydhGm12878E2f4IggmusUniPk.narrowPeak.gz
GM12878	EBF1	HudsonAlpha	http://hgdownload.cse.ucsc.edu/goldenPath/hg19/encodeDCC/wgEncodeAwgTfbsUniform/wgEncodeAwgTfbsHaibGm12878Ebf1sc137065Pcr1xUniPk.narrowPeak.gz
GM12878	EBF1	Stanford	http://hgdownload.cse.ucsc.edu/goldenPath/hg19/encodeDCC/wgEncodeAwgTfbsUniform/wgEncodeAwgTfbsSydhGm12878Ebf1sc137065UniPk.narrowPeak.gz
GM12878	EGR1	HudsonAlpha	http://hgdownload.cse.ucsc.edu/goldenPath/hg19/encodeDCC/wgEncodeAwgTfbsUniform/wgEncodeAwgTfbsHaibGm12878Egr1Pcr2xUniPk.narrowPeak.gz
GM12878	ELF1	HudsonAlpha	http://hgdownload.cse.ucsc.edu/goldenPath/hg19/encodeDCC/wgEncodeAwgTfbsUniform/wgEncodeAwgTfbsHaibGm12878Elf1sc631V0416101UniPk.narrowPeak.gz
GM12878	ELK1	Stanford	http://hgdownload.cse.ucsc.edu/goldenPath/hg19/encodeDCC/wgEncodeAwgTfbsUniform/wgEncodeAwgTfbsSydhGm12878Elk112771IggmusUniPk.narrowPeak.gz
GM12878	EP300	HudsonAlpha	http://hgdownload.cse.ucsc.edu/goldenPath/hg19/encodeDCC/wgEncodeAwgTfbsUniform/wgEncodeAwgTfbsHaibGm12878P300Pcr1xUniPk.narrowPeak.gz
GM12878	EP300	Stanford	http://hgdownload.cse.ucsc.edu/goldenPath/hg19/encodeDCC/wgEncodeAwgTfbsUniform/wgEncodeAwgTfbsSydhGm12878P300bUniPk.narrowPeak.gz
GM12878	EP300	Stanford	http://hgdownload.cse.ucsc.edu/goldenPath/hg19/encodeDCC/wgEncodeAwgTfbsUniform/wgEncodeAwgTfbsSydhGm12878P300IggmusUniPk.narrowPeak.gz
GM12878	ETS1	HudsonAlpha	http://hgdownload.cse.ucsc.edu/goldenPath/hg19/encodeDCC/wgEncodeAwgTfbsUniform/wgEncodeAwgTfbsHaibGm12878Ets1Pcr1xUniPk.narrowPeak.gz
GM12878	EZH2	Broad	http://hgdownload.cse.ucsc.edu/goldenPath/hg19/encodeDCC/wgEncodeAwgTfbsUniform/wgEncodeAwgTfbsBroadGm12878Ezh239875UniPk.narrowPeak.gz
GM12878	FOS	Yale	http://hgdownload.cse.ucsc.edu/goldenPath/hg19/encodeDCC/wgEncodeAwgTfbsUniform/wgEncodeAwgTfbsSydhGm12878CfosUniPk.narrowPeak.gz
GM12878	FOXM1	HudsonAlpha	http://hgdownload.cse.ucsc.edu/goldenPath/hg19/encodeDCC/wgEncodeAwgTfbsUniform/wgEncodeAwgTfbsHaibGm12878Foxm1sc502V0422111UniPk.narrowPeak.gz
GM12878	GABPA	HudsonAlpha	http://hgdownload.cse.ucsc.edu/goldenPath/hg19/encodeDCC/wgEncodeAwgTfbsUniform/wgEncodeAwgTfbsHaibGm12878GabpPcr2xUniPk.narrowPeak.gz
GM12878	IKZF1	USC	http://hgdownload.cse.ucsc.edu/goldenPath/hg19/encodeDCC/wgEncodeAwgTfbsUniform/wgEncodeAwgTfbsSydhGm12878Ikzf1iknuclaUniPk.narrowPeak.gz
GM12878	IRF4	HudsonAlpha	http://hgdownload.cse.ucsc.edu/goldenPath/hg19/encodeDCC/wgEncodeAwgTfbsUniform/wgEncodeAwgTfbsHaibGm12878Irf4sc6059Pcr1xUniPk.narrowPeak.gz
GM12878	JUND	Yale	http://hgdownload.cse.ucsc.edu/goldenPath/hg19/encodeDCC/wgEncodeAwgTfbsUniform/wgEncodeAwgTfbsSydhGm12878JundUniPk.narrowPeak.gz
GM12878	MAX	Stanford	http://hgdownload.cse.ucsc.edu/goldenPath/hg19/encodeDCC/wgEncodeAwgTfbsUniform/wgEncodeAwgTfbsSydhGm12878MaxIggmusUniPk.narrowPeak.gz
GM12878	MAZ	Stanford	http://hgdownload.cse.ucsc.edu/goldenPath/hg19/encodeDCC/wgEncodeAwgTfbsUniform/wgEncodeAwgTfbsSydhGm12878Mazab85725IggmusUniPk.narrowPeak.gz
GM12878	MEF2A	HudsonAlpha	http://hgdownload.cse.ucsc.edu/goldenPath/hg19/encodeDCC/wgEncodeAwgTfbsUniform/wgEncodeAwgTfbsHaibGm12878Mef2aPcr1xUniPk.narrowPeak.gz
GM12878	MEF2C	HudsonAlpha	http://hgdownload.cse.ucsc.edu/goldenPath/hg19/encodeDCC/wgEncodeAwgTfbsUniform/wgEncodeAwgTfbsHaibGm12878Mef2csc13268V0416101UniPk.narrowPeak.gz
GM12878	MTA3	HudsonAlpha	http://hgdownload.cse.ucsc.edu/goldenPath/hg19/encodeDCC/wgEncodeAwgTfbsUniform/wgEncodeAwgTfbsHaibGm12878Mta3sc81325V0422111UniPk.narrowPeak.gz
GM12878	MXI1	Stanford	http://hgdownload.cse.ucsc.edu/goldenPath/hg19/encodeDCC/wgEncodeAwgTfbsUniform/wgEncodeAwgTfbsSydhGm12878Mxi1IggmusUniPk.narrowPeak.gz
GM12878	MYC	UT-A	http://hgdownload.cse.ucsc.edu/goldenPath/hg19/encodeDCC/wgEncodeAwgTfbsUniform/wgEncodeAwgTfbsUtaGm12878CmycUniPk.narrowPeak.gz
GM12878	NFATC1	HudsonAlpha	http://hgdownload.cse.ucsc.edu/goldenPath/hg19/encodeDCC/wgEncodeAwgTfbsUniform/wgEncodeAwgTfbsHaibGm12878Nfatc1sc17834V0422111UniPk.narrowPeak.gz
GM12878	NFE2	Stanford	http://hgdownload.cse.ucsc.edu/goldenPath/hg19/encodeDCC/wgEncodeAwgTfbsUniform/wgEncodeAwgTfbsSydhGm12878Nfe2sc22827UniPk.narrowPeak.gz
GM12878	NFIC	HudsonAlpha	http://hgdownload.cse.ucsc.edu/goldenPath/hg19/encodeDCC/wgEncodeAwgTfbsUniform/wgEncodeAwgTfbsHaibGm12878Nficsc81335V0422111UniPk.narrowPeak.gz
GM12878	NFYA	Harvard	http://hgdownload.cse.ucsc.edu/goldenPath/hg19/encodeDCC/wgEncodeAwgTfbsUniform/wgEncodeAwgTfbsSydhGm12878NfyaIggmusUniPk.narrowPeak.gz
GM12878	NFYB	Harvard	http://hgdownload.cse.ucsc.edu/goldenPath/hg19/encodeDCC/wgEncodeAwgTfbsUniform/wgEncodeAwgTfbsSydhGm12878NfybIggmusUniPk.narrowPeak.gz
GM12878	NR2C2	USC	http://hgdownload.cse.ucsc.edu/goldenPath/hg19/encodeDCC/wgEncodeAwgTfbsUniform/wgEncodeAwgTfbsSydhGm12878Tr4UniPk.narrowPeak.gz
GM12878	NRF1	Stanford	http://hgdownload.cse.ucsc.edu/goldenPath/hg19/encodeDCC/wgEncodeAwgTfbsUniform/wgEncodeAwgTfbsSydhGm12878Nrf1IggmusUniPk.narrowPeak.gz
GM12878	PAX5	HudsonAlpha	http://hgdownload.cse.ucsc.edu/goldenPath/hg19/encodeDCC/wgEncodeAwgTfbsUniform/wgEncodeAwgTfbsHaibGm12878Pax5c20Pcr1xUniPk.narrowPeak.gz
GM12878	PAX5	HudsonAlpha	http://hgdownload.cse.ucsc.edu/goldenPath/hg19/encodeDCC/wgEncodeAwgTfbsUniform/wgEncodeAwgTfbsHaibGm12878Pax5n19Pcr1xUniPk.narrowPeak.gz
GM12878	PBX3	HudsonAlpha	http://hgdownload.cse.ucsc.edu/goldenPath/hg19/encodeDCC/wgEncodeAwgTfbsUniform/wgEncodeAwgTfbsHaibGm12878Pbx3Pcr1xUniPk.narrowPeak.gz
GM12878	PML	HudsonAlpha	http://hgdownload.cse.ucsc.edu/goldenPath/hg19/encodeDCC/wgEncodeAwgTfbsUniform/wgEncodeAwgTfbsHaibGm12878Pmlsc71910V0422111UniPk.narrowPeak.gz
GM12878	POLR2A	HudsonAlpha	http://hgdownload.cse.ucsc.edu/goldenPath/hg19/encodeDCC/wgEncodeAwgTfbsUniform/wgEncodeAwgTfbsHaibGm12878Pol24h8Pcr1xUniPk.narrowPeak.gz
GM12878	POLR2A	HudsonAlpha	http://hgdownload.cse.ucsc.edu/goldenPath/hg19/encodeDCC/wgEncodeAwgTfbsUniform/wgEncodeAwgTfbsHaibGm12878Pol2Pcr2xUniPk.narrowPeak.gz
GM12878	POLR2A	Stanford	http://hgdownload.cse.ucsc.edu/goldenPath/hg19/encodeDCC/wgEncodeAwgTfbsUniform/wgEncodeAwgTfbsSydhGm12878Pol2IggmusUniPk.narrowPeak.gz
GM12878	POLR2A	Stanford	http://hgdownload.cse.ucsc.edu/goldenPath/hg19/encodeDCC/wgEncodeAwgTfbsUniform/wgEncodeAwgTfbsSydhGm12878Pol2s2IggmusUniPk.narrowPeak.gz
GM12878	POLR2A	UT-A	http://hgdownload.cse.ucsc.edu/goldenPath/hg19/encodeDCC/wgEncodeAwgTfbsUniform/wgEncodeAwgTfbsUtaGm12878Pol2UniPk.narrowPeak.gz
GM12878	POLR2A	Yale	http://hgdownload.cse.ucsc.edu/goldenPath/hg19/encodeDCC/wgEncodeAwgTfbsUniform/wgEncodeAwgTfbsSydhGm12878Pol2UniPk.narrowPeak.gz
GM12878	POLR3G	Yale	http://hgdownload.cse.ucsc.edu/goldenPath/hg19/encodeDCC/wgEncodeAwgTfbsUniform/wgEncodeAwgTfbsSydhGm12878Pol3UniPk.narrowPeak.gz
GM12878	POU2F2	HudsonAlpha	http://hgdownload.cse.ucsc.edu/goldenPath/hg19/encodeDCC/wgEncodeAwgTfbsUniform/wgEncodeAwgTfbsHaibGm12878Pou2f2Pcr1xUniPk.narrowPeak.gz
GM12878	RAD21	HudsonAlpha	http://hgdownload.cse.ucsc.edu/goldenPath/hg19/encodeDCC/wgEncodeAwgTfbsUniform/wgEncodeAwgTfbsHaibGm12878Rad21V0416101UniPk.narrowPeak.gz
GM12878	RAD21	Stanford	http://hgdownload.cse.ucsc.edu/goldenPath/hg19/encodeDCC/wgEncodeAwgTfbsUniform/wgEncodeAwgTfbsSydhGm12878Rad21IggrabUniPk.narrowPeak.gz
GM12878	RCOR1	Stanford	http://hgdownload.cse.ucsc.edu/goldenPath/hg19/encodeDCC/wgEncodeAwgTfbsUniform/wgEncodeAwgTfbsSydhGm12878Corestsc30189IggmusUniPk.narrowPeak.gz
GM12878	RELA	Stanford	http://hgdownload.cse.ucsc.edu/goldenPath/hg19/encodeDCC/wgEncodeAwgTfbsUniform/wgEncodeAwgTfbsSydhGm12878NfkbTnfaIggrabUniPk.narrowPeak.gz
GM12878	REST	HudsonAlpha	http://hgdownload.cse.ucsc.edu/goldenPath/hg19/encodeDCC/wgEncodeAwgTfbsUniform/wgEncodeAwgTfbsHaibGm12878NrsfPcr1xUniPk.narrowPeak.gz
GM12878	RFX5	Stanford	http://hgdownload.cse.ucsc.edu/goldenPath/hg19/encodeDCC/wgEncodeAwgTfbsUniform/wgEncodeAwgTfbsSydhGm12878Rfx5200401194IggmusUniPk.narrowPeak.gz
GM12878	RUNX3	HudsonAlpha	http://hgdownload.cse.ucsc.edu/goldenPath/hg19/encodeDCC/wgEncodeAwgTfbsUniform/wgEncodeAwgTfbsHaibGm12878Runx3sc101553V0422111UniPk.narrowPeak.gz
GM12878	RXRA	HudsonAlpha	http://hgdownload.cse.ucsc.edu/goldenPath/hg19/encodeDCC/wgEncodeAwgTfbsUniform/wgEncodeAwgTfbsHaibGm12878RxraPcr1xUniPk.narrowPeak.gz
GM12878	SIN3A	Stanford	http://hgdownload.cse.ucsc.edu/goldenPath/hg19/encodeDCC/wgEncodeAwgTfbsUniform/wgEncodeAwgTfbsSydhGm12878Sin3anb6001263IggmusUniPk.narrowPeak.gz
GM12878	SIX5	HudsonAlpha	http://hgdownload.cse.ucsc.edu/goldenPath/hg19/encodeDCC/wgEncodeAwgTfbsUniform/wgEncodeAwgTfbsHaibGm12878Six5Pcr1xUniPk.narrowPeak.gz
GM12878	SMC3	Stanford	http://hgdownload.cse.ucsc.edu/goldenPath/hg19/encodeDCC/wgEncodeAwgTfbsUniform/wgEncodeAwgTfbsSydhGm12878Smc3ab9263IggmusUniPk.narrowPeak.gz
GM12878	SP1	HudsonAlpha	http://hgdownload.cse.ucsc.edu/goldenPath/hg19/encodeDCC/wgEncodeAwgTfbsUniform/wgEncodeAwgTfbsHaibGm12878Sp1Pcr1xUniPk.narrowPeak.gz
GM12878	SPI1	HudsonAlpha	http://hgdownload.cse.ucsc.edu/goldenPath/hg19/encodeDCC/wgEncodeAwgTfbsUniform/wgEncodeAwgTfbsHaibGm12878Pu1Pcr1xUniPk.narrowPeak.gz
GM12878	SRF	HudsonAlpha	http://hgdownload.cse.ucsc.edu/goldenPath/hg19/encodeDCC/wgEncodeAwgTfbsUniform/wgEncodeAwgTfbsHaibGm12878SrfPcr2xUniPk.narrowPeak.gz
GM12878	STAT1	Stanford	http://hgdownload.cse.ucsc.edu/goldenPath/hg19/encodeDCC/wgEncodeAwgTfbsUniform/wgEncodeAwgTfbsSydhGm12878Stat1UniPk.narrowPeak.gz
GM12878	STAT3	Stanford	http://hgdownload.cse.ucsc.edu/goldenPath/hg19/encodeDCC/wgEncodeAwgTfbsUniform/wgEncodeAwgTfbsSydhGm12878Stat3IggmusUniPk.narrowPeak.gz
GM12878	STAT5A	HudsonAlpha	http://hgdownload.cse.ucsc.edu/goldenPath/hg19/encodeDCC/wgEncodeAwgTfbsUniform/wgEncodeAwgTfbsHaibGm12878Stat5asc74442V0422111UniPk.narrowPeak.gz
GM12878	TAF1	HudsonAlpha	http://hgdownload.cse.ucsc.edu/goldenPath/hg19/encodeDCC/wgEncodeAwgTfbsUniform/wgEncodeAwgTfbsHaibGm12878Taf1Pcr1xUniPk.narrowPeak.gz
GM12878	TBL1XR1	Stanford	http://hgdownload.cse.ucsc.edu/goldenPath/hg19/encodeDCC/wgEncodeAwgTfbsUniform/wgEncodeAwgTfbsSydhGm12878Tblr1ab24550IggmusUniPk.narrowPeak.gz
GM12878	TBP	Stanford	http://hgdownload.cse.ucsc.edu/goldenPath/hg19/encodeDCC/wgEncodeAwgTfbsUniform/wgEncodeAwgTfbsSydhGm12878TbpIggmusUniPk.narrowPeak.gz
GM12878	TCF12	HudsonAlpha	http://hgdownload.cse.ucsc.edu/goldenPath/hg19/encodeDCC/wgEncodeAwgTfbsUniform/wgEncodeAwgTfbsHaibGm12878Tcf12Pcr1xUniPk.narrowPeak.gz
GM12878	TCF3	HudsonAlpha	http://hgdownload.cse.ucsc.edu/goldenPath/hg19/encodeDCC/wgEncodeAwgTfbsUniform/wgEncodeAwgTfbsHaibGm12878Tcf3Pcr1xUniPk.narrowPeak.gz
GM12878	USF1	HudsonAlpha	http://hgdownload.cse.ucsc.edu/goldenPath/hg19/encodeDCC/wgEncodeAwgTfbsUniform/wgEncodeAwgTfbsHaibGm12878Usf1Pcr2xUniPk.narrowPeak.gz
GM12878	USF2	Stanford	http://hgdownload.cse.ucsc.edu/goldenPath/hg19/encodeDCC/wgEncodeAwgTfbsUniform/wgEncodeAwgTfbsSydhGm12878Usf2IggmusUniPk.narrowPeak.gz
GM12878	WRNIP1	Stanford	http://hgdownload.cse.ucsc.edu/goldenPath/hg19/encodeDCC/wgEncodeAwgTfbsUniform/wgEncodeAwgTfbsSydhGm12878WhipIggmusUniPk.narrowPeak.gz
GM12878	YY1	HudsonAlpha	http://hgdownload.cse.ucsc.edu/goldenPath/hg19/encodeDCC/wgEncodeAwgTfbsUniform/wgEncodeAwgTfbsHaibGm12878Yy1sc281Pcr1xUniPk.narrowPeak.gz
GM12878	YY1	USC	http://hgdownload.cse.ucsc.edu/goldenPath/hg19/encodeDCC/wgEncodeAwgTfbsUniform/wgEncodeAwgTfbsSydhGm12878Yy1UniPk.narrowPeak.gz
GM12878	ZBTB33	HudsonAlpha	http://hgdownload.cse.ucsc.edu/goldenPath/hg19/encodeDCC/wgEncodeAwgTfbsUniform/wgEncodeAwgTfbsHaibGm12878Zbtb33Pcr1xUniPk.narrowPeak.gz
GM12878	ZEB1	HudsonAlpha	http://hgdownload.cse.ucsc.edu/goldenPath/hg19/encodeDCC/wgEncodeAwgTfbsUniform/wgEncodeAwgTfbsHaibGm12878Zeb1sc25388V0416102UniPk.narrowPeak.gz
GM12878	ZNF143	Stanford	http://hgdownload.cse.ucsc.edu/goldenPath/hg19/encodeDCC/wgEncodeAwgTfbsUniform/wgEncodeAwgTfbsSydhGm12878Znf143166181apUniPk.narrowPeak.gz
GM12878	ZNF274	USC	http://hgdownload.cse.ucsc.edu/goldenPath/hg19/encodeDCC/wgEncodeAwgTfbsUniform/wgEncodeAwgTfbsSydhGm12878Znf274UniPk.narrowPeak.gz
GM12878	ZZZ3	Harvard	http://hgdownload.cse.ucsc.edu/goldenPath/hg19/encodeDCC/wgEncodeAwgTfbsUniform/wgEncodeAwgTfbsSydhGm12878Zzz3UniPk.narrowPeak.gz
GM12891	CTCF	UT-A	http://hgdownload.cse.ucsc.edu/goldenPath/hg19/encodeDCC/wgEncodeAwgTfbsUniform/wgEncodeAwgTfbsUtaGm12891CtcfUniPk.narrowPeak.gz
GM12891	PAX5	HudsonAlpha	http://hgdownload.cse.ucsc.edu/goldenPath/hg19/encodeDCC/wgEncodeAwgTfbsUniform/wgEncodeAwgTfbsHaibGm12891Pax5c20V0416101UniPk.narrowPeak.gz
GM12891	POLR2A	HudsonAlpha	http://hgdownload.cse.ucsc.edu/goldenPath/hg19/encodeDCC/wgEncodeAwgTfbsUniform/wgEncodeAwgTfbsHaibGm12891Pol24h8Pcr1xUniPk.narrowPeak.gz
GM12891	POLR2A	HudsonAlpha	http://hgdownload.cse.ucsc.edu/goldenPath/hg19/encodeDCC/wgEncodeAwgTfbsUniform/wgEncodeAwgTfbsHaibGm12891Pol2Pcr1xUniPk.narrowPeak.gz
GM12891	POLR2A	Stanford	http://hgdownload.cse.ucsc.edu/goldenPath/hg19/encodeDCC/wgEncodeAwgTfbsUniform/wgEncodeAwgTfbsSydhGm12891Pol2IggmusUniPk.narrowPeak.gz
GM12891	POU2F2	HudsonAlpha	http://hgdownload.cse.ucsc.edu/goldenPath/hg19/encodeDCC/wgEncodeAwgTfbsUniform/wgEncodeAwgTfbsHaibGm12891Pou2f2Pcr1xUniPk.narrowPeak.gz
GM12891	RELA	Stanford	http://hgdownload.cse.ucsc.edu/goldenPath/hg19/encodeDCC/wgEncodeAwgTfbsUniform/wgEncodeAwgTfbsSydhGm12891NfkbTnfaIggrabUniPk.narrowPeak.gz
GM12891	SPI1	HudsonAlpha	http://hgdownload.cse.ucsc.edu/goldenPath/hg19/encodeDCC/wgEncodeAwgTfbsUniform/wgEncodeAwgTfbsHaibGm12891Pu1Pcr1xUniPk.narrowPeak.gz
GM12891	TAF1	HudsonAlpha	http://hgdownload.cse.ucsc.edu/goldenPath/hg19/encodeDCC/wgEncodeAwgTfbsUniform/wgEncodeAwgTfbsHaibGm12891Taf1Pcr1xUniPk.narrowPeak.gz
GM12891	YY1	HudsonAlpha	http://hgdownload.cse.ucsc.edu/goldenPath/hg19/encodeDCC/wgEncodeAwgTfbsUniform/wgEncodeAwgTfbsHaibGm12891Yy1sc281V0416101UniPk.narrowPeak.gz
GM12892	CTCF	UT-A	http://hgdownload.cse.ucsc.edu/goldenPath/hg19/encodeDCC/wgEncodeAwgTfbsUniform/wgEncodeAwgTfbsUtaGm12892CtcfUniPk.narrowPeak.gz
GM12892	PAX5	HudsonAlpha	http://hgdownload.cse.ucsc.edu/goldenPath/hg19/encodeDCC/wgEncodeAwgTfbsUniform/wgEncodeAwgTfbsHaibGm12892Pax5c20V0416101UniPk.narrowPeak.gz
GM12892	POLR2A	HudsonAlpha	http://hgdownload.cse.ucsc.edu/goldenPath/hg19/encodeDCC/wgEncodeAwgTfbsUniform/wgEncodeAwgTfbsHaibGm12892Pol24h8V0416102UniPk.narrowPeak.gz
GM12892	POLR2A	HudsonAlpha	http://hgdownload.cse.ucsc.edu/goldenPath/hg19/encodeDCC/wgEncodeAwgTfbsUniform/wgEncodeAwgTfbsHaibGm12892Pol2V0416102UniPk.narrowPeak.gz
GM12892	POLR2A	Stanford	http://hgdownload.cse.ucsc.edu/goldenPath/hg19/encodeDCC/wgEncodeAwgTfbsUniform/wgEncodeAwgTfbsSydhGm12892Pol2IggmusUniPk.narrowPeak.gz
GM12892	RELA	Stanford	http://hgdownload.cse.ucsc.edu/goldenPath/hg19/encodeDCC/wgEncodeAwgTfbsUniform/wgEncodeAwgTfbsSydhGm12892NfkbTnfaIggrabUniPk.narrowPeak.gz
GM12892	TAF1	HudsonAlpha	http://hgdownload.cse.ucsc.edu/goldenPath/hg19/encodeDCC/wgEncodeAwgTfbsUniform/wgEncodeAwgTfbsHaibGm12892Taf1V0416102UniPk.narrowPeak.gz
GM12892	YY1	HudsonAlpha	http://hgdownload.cse.ucsc.edu/goldenPath/hg19/encodeDCC/wgEncodeAwgTfbsUniform/wgEncodeAwgTfbsHaibGm12892Yy1V0416101UniPk.narrowPeak.gz
GM15510	POLR2A	Stanford	http://hgdownload.cse.ucsc.edu/goldenPath/hg19/encodeDCC/wgEncodeAwgTfbsUniform/wgEncodeAwgTfbsSydhGm15510Pol2IggmusUniPk.narrowPeak.gz
GM15510	RELA	Stanford	http://hgdownload.cse.ucsc.edu/goldenPath/hg19/encodeDCC/wgEncodeAwgTfbsUniform/wgEncodeAwgTfbsSydhGm15510NfkbTnfaIggrabUniPk.narrowPeak.gz
GM18505	POLR2A	Stanford	http://hgdownload.cse.ucsc.edu/goldenPath/hg19/encodeDCC/wgEncodeAwgTfbsUniform/wgEncodeAwgTfbsSydhGm18505Pol2IggmusUniPk.narrowPeak.gz
GM18505	RELA	Stanford	http://hgdownload.cse.ucsc.edu/goldenPath/hg19/encodeDCC/wgEncodeAwgTfbsUniform/wgEncodeAwgTfbsSydhGm18505NfkbTnfaIggrabUniPk.narrowPeak.gz
GM18526	POLR2A	Stanford	http://hgdownload.cse.ucsc.edu/goldenPath/hg19/encodeDCC/wgEncodeAwgTfbsUniform/wgEncodeAwgTfbsSydhGm18526Pol2IggmusUniPk.narrowPeak.gz
GM18526	RELA	Stanford	http://hgdownload.cse.ucsc.edu/goldenPath/hg19/encodeDCC/wgEncodeAwgTfbsUniform/wgEncodeAwgTfbsSydhGm18526NfkbTnfaIggrabUniPk.narrowPeak.gz
GM18951	POLR2A	Stanford	http://hgdownload.cse.ucsc.edu/goldenPath/hg19/encodeDCC/wgEncodeAwgTfbsUniform/wgEncodeAwgTfbsSydhGm18951Pol2IggmusUniPk.narrowPeak.gz
GM18951	RELA	Stanford	http://hgdownload.cse.ucsc.edu/goldenPath/hg19/encodeDCC/wgEncodeAwgTfbsUniform/wgEncodeAwgTfbsSydhGm18951NfkbTnfaIggrabUniPk.narrowPeak.gz
GM19099	POLR2A	Stanford	http://hgdownload.cse.ucsc.edu/goldenPath/hg19/encodeDCC/wgEncodeAwgTfbsUniform/wgEncodeAwgTfbsSydhGm19099Pol2IggmusUniPk.narrowPeak.gz
GM19099	RELA	Stanford	http://hgdownload.cse.ucsc.edu/goldenPath/hg19/encodeDCC/wgEncodeAwgTfbsUniform/wgEncodeAwgTfbsSydhGm19099NfkbTnfaIggrabUniPk.narrowPeak.gz
GM19193	POLR2A	Stanford	http://hgdownload.cse.ucsc.edu/goldenPath/hg19/encodeDCC/wgEncodeAwgTfbsUniform/wgEncodeAwgTfbsSydhGm19193Pol2IggmusUniPk.narrowPeak.gz
GM19193	RELA	Stanford	http://hgdownload.cse.ucsc.edu/goldenPath/hg19/encodeDCC/wgEncodeAwgTfbsUniform/wgEncodeAwgTfbsSydhGm19193NfkbTnfaIggrabUniPk.narrowPeak.gz
GM19238	CTCF	UT-A	http://hgdownload.cse.ucsc.edu/goldenPath/hg19/encodeDCC/wgEncodeAwgTfbsUniform/wgEncodeAwgTfbsUtaGm19238CtcfUniPk.narrowPeak.gz
GM19239	CTCF	UT-A	http://hgdownload.cse.ucsc.edu/goldenPath/hg19/encodeDCC/wgEncodeAwgTfbsUniform/wgEncodeAwgTfbsUtaGm19239CtcfUniPk.narrowPeak.gz
GM19240	CTCF	UT-A	http://hgdownload.cse.ucsc.edu/goldenPath/hg19/encodeDCC/wgEncodeAwgTfbsUniform/wgEncodeAwgTfbsUtaGm19240CtcfUniPk.narrowPeak.gz
H1-hESC	ATF2	HudsonAlpha	http://hgdownload.cse.ucsc.edu/goldenPath/hg19/encodeDCC/wgEncodeAwgTfbsUniform/wgEncodeAwgTfbsHaibH1hescAtf2sc81188V0422111UniPk.narrowPeak.gz
H1-hESC	ATF3	HudsonAlpha	http://hgdownload.cse.ucsc.edu/goldenPath/hg19/encodeDCC/wgEncodeAwgTfbsUniform/wgEncodeAwgTfbsHaibH1hescAtf3V0416102UniPk.narrowPeak.gz
H1-hESC	BACH1	Stanford	http://hgdownload.cse.ucsc.edu/goldenPath/hg19/encodeDCC/wgEncodeAwgTfbsUniform/wgEncodeAwgTfbsSydhH1hescBach1sc14700IggrabUniPk.narrowPeak.gz
H1-hESC	BCL11A	HudsonAlpha	http://hgdownload.cse.ucsc.edu/goldenPath/hg19/encodeDCC/wgEncodeAwgTfbsUniform/wgEncodeAwgTfbsHaibH1hescBcl11aPcr1xUniPk.narrowPeak.gz
H1-hESC	BRCA1	Stanford	http://hgdownload.cse.ucsc.edu/goldenPath/hg19/encodeDCC/wgEncodeAwgTfbsUniform/wgEncodeAwgTfbsSydhH1hescBrca1IggrabUniPk.narrowPeak.gz
H1-hESC	CEBPB	Stanford	http://hgdownload.cse.ucsc.edu/goldenPath/hg19/encodeDCC/wgEncodeAwgTfbsUniform/wgEncodeAwgTfbsSydhH1hescCebpbIggrabUniPk.narrowPeak.gz
H1-hESC	CHD1	Broad	http://hgdownload.cse.ucsc.edu/goldenPath/hg19/encodeDCC/wgEncodeAwgTfbsUniform/wgEncodeAwgTfbsBroadH1hescChd1a301218aUniPk.narrowPeak.gz
H1-hESC	CHD1	Stanford	http://hgdownload.cse.ucsc.edu/goldenPath/hg19/encodeDCC/wgEncodeAwgTfbsUniform/wgEncodeAwgTfbsSydhH1hescChd1a301218aIggrabUniPk.narrowPeak.gz
H1-hESC	CHD2	Stanford	http://hgdownload.cse.ucsc.edu/goldenPath/hg19/encodeDCC/wgEncodeAwgTfbsUniform/wgEncodeAwgTfbsSydhH1hescChd2IggrabUniPk.narrowPeak.gz
H1-hESC	CTBP2	USC	http://hgdownload.cse.ucsc.edu/goldenPath/hg19/encodeDCC/wgEncodeAwgTfbsUniform/wgEncodeAwgTfbsSydhH1hescCtbp2UcdUniPk.narrowPeak.gz
H1-hESC	CTCF	Broad	http://hgdownload.cse.ucsc.edu/goldenPath/hg19/encodeDCC/wgEncodeAwgTfbsUniform/wgEncodeAwgTfbsBroadH1hescCtcfUniPk.narrowPeak.gz
H1-hESC	CTCF	HudsonAlpha	http://hgdownload.cse.ucsc.edu/goldenPath/hg19/encodeDCC/wgEncodeAwgTfbsUniform/wgEncodeAwgTfbsHaibH1hescCtcfsc5916V0416102UniPk.narrowPeak.gz
H1-hESC	CTCF	UT-A	http://hgdownload.cse.ucsc.edu/goldenPath/hg19/encodeDCC/wgEncodeAwgTfbsUniform/wgEncodeAwgTfbsUtaH1hescCtcfUniPk.narrowPeak.gz
H1-hESC	EGR1	HudsonAlpha	http://hgdownload.cse.ucsc.edu/goldenPath/hg19/encodeDCC/wgEncodeAwgTfbsUniform/wgEncodeAwgTfbsHaibH1hescEgr1V0416102UniPk.narrowPeak.gz
H1-hESC	EP300	HudsonAlpha	http://hgdownload.cse.ucsc.edu/goldenPath/hg19/encodeDCC/wgEncodeAwgTfbsUniform/wgEncodeAwgTfbsHaibH1hescP300V0416102UniPk.narrowPeak.gz
H1-hESC	EZH2	Broad	http://hgdownload.cse.ucsc.edu/goldenPath/hg19/encodeDCC/wgEncodeAwgTfbsUniform/wgEncodeAwgTfbsBroadH1hescEzh239875UniPk.narrowPeak.gz
H1-hESC	FOSL1	HudsonAlpha	http://hgdownload.cse.ucsc.edu/goldenPath/hg19/encodeDCC/wgEncodeAwgTfbsUniform/wgEncodeAwgTfbsHaibH1hescFosl1sc183V0416102UniPk.narrowPeak.gz
H1-hESC	GABPA	HudsonAlpha	http://hgdownload.cse.ucsc.edu/goldenPath/hg19/encodeDCC/wgEncodeAwgTfbsUniform/wgEncodeAwgTfbsHaibH1hescGabpPcr1xUniPk.narrowPeak.gz
H1-hESC	GTF2F1	Stanford	http://hgdownload.cse.ucsc.edu/goldenPath/hg19/encodeDCC/wgEncodeAwgTfbsUniform/wgEncodeAwgTfbsSydhH1hescGtf2f1IggrabUniPk.narrowPeak.gz
H1-hESC	HDAC2	HudsonAlpha	http://hgdownload.cse.ucsc.edu/goldenPath/hg19/encodeDCC/wgEncodeAwgTfbsUniform/wgEncodeAwgTfbsHaibH1hescHdac2sc6296V0416102UniPk.narrowPeak.gz
H1-hESC	JUN	Stanford	http://hgdownload.cse.ucsc.edu/goldenPath/hg19/encodeDCC/wgEncodeAwgTfbsUniform/wgEncodeAwgTfbsSydhH1hescCjunIggrabUniPk.narrowPeak.gz
H1-hESC	JUND	HudsonAlpha	http://hgdownload.cse.ucsc.edu/goldenPath/hg19/encodeDCC/wgEncodeAwgTfbsUniform/wgEncodeAwgTfbsHaibH1hescJundV0416102UniPk.narrowPeak.gz
H1-hESC	JUND	Stanford	http://hgdownload.cse.ucsc.edu/goldenPath/hg19/encodeDCC/wgEncodeAwgTfbsUniform/wgEncodeAwgTfbsSydhH1hescJundIggrabUniPk.narrowPeak.gz
H1-hESC	KDM5A	Broad	http://hgdownload.cse.ucsc.edu/goldenPath/hg19/encodeDCC/wgEncodeAwgTfbsUniform/wgEncodeAwgTfbsBroadH1hescJarid1aab26049UniPk.narrowPeak.gz
H1-hESC	MAFK	Stanford	http://hgdownload.cse.ucsc.edu/goldenPath/hg19/encodeDCC/wgEncodeAwgTfbsUniform/wgEncodeAwgTfbsSydhH1hescMafkIggrabUniPk.narrowPeak.gz
H1-hESC	MAX	USC	http://hgdownload.cse.ucsc.edu/goldenPath/hg19/encodeDCC/wgEncodeAwgTfbsUniform/wgEncodeAwgTfbsSydhH1hescMaxUcdUniPk.narrowPeak.gz
H1-hESC	MXI1	Stanford	http://hgdownload.cse.ucsc.edu/goldenPath/hg19/encodeDCC/wgEncodeAwgTfbsUniform/wgEncodeAwgTfbsSydhH1hescMxi1IggrabUniPk.narrowPeak.gz
H1-hESC	MYC	Stanford	http://hgdownload.cse.ucsc.edu/goldenPath/hg19/encodeDCC/wgEncodeAwgTfbsUniform/wgEncodeAwgTfbsSydhH1hescCmycIggrabUniPk.narrowPeak.gz
H1-hESC	MYC	UT-A	http://hgdownload.cse.ucsc.edu/goldenPath/hg19/encodeDCC/wgEncodeAwgTfbsUniform/wgEncodeAwgTfbsUtaH1hescCmycUniPk.narrowPeak.gz
H1-hESC	NANOG	HudsonAlpha	http://hgdownload.cse.ucsc.edu/goldenPath/hg19/encodeDCC/wgEncodeAwgTfbsUniform/wgEncodeAwgTfbsHaibH1hescNanogsc33759V0416102UniPk.narrowPeak.gz
H1-hESC	NRF1	Stanford	http://hgdownload.cse.ucsc.edu/goldenPath/hg19/encodeDCC/wgEncodeAwgTfbsUniform/wgEncodeAwgTfbsSydhH1hescNrf1IggrabUniPk.narrowPeak.gz
H1-hESC	POLR2A	HudsonAlpha	http://hgdownload.cse.ucsc.edu/goldenPath/hg19/encodeDCC/wgEncodeAwgTfbsUniform/wgEncodeAwgTfbsHaibH1hescPol24h8V0416102UniPk.narrowPeak.gz
H1-hESC	POLR2A	HudsonAlpha	http://hgdownload.cse.ucsc.edu/goldenPath/hg19/encodeDCC/wgEncodeAwgTfbsUniform/wgEncodeAwgTfbsHaibH1hescPol2V0416102UniPk.narrowPeak.gz
H1-hESC	POLR2A	UT-A	http://hgdownload.cse.ucsc.edu/goldenPath/hg19/encodeDCC/wgEncodeAwgTfbsUniform/wgEncodeAwgTfbsUtaH1hescPol2UniPk.narrowPeak.gz
H1-hESC	POU5F1	HudsonAlpha	http://hgdownload.cse.ucsc.edu/goldenPath/hg19/encodeDCC/wgEncodeAwgTfbsUniform/wgEncodeAwgTfbsHaibH1hescPou5f1sc9081V0416102UniPk.narrowPeak.gz
H1-hESC	RAD21	HudsonAlpha	http://hgdownload.cse.ucsc.edu/goldenPath/hg19/encodeDCC/wgEncodeAwgTfbsUniform/wgEncodeAwgTfbsHaibH1hescRad21V0416102UniPk.narrowPeak.gz
H1-hESC	RAD21	Stanford	http://hgdownload.cse.ucsc.edu/goldenPath/hg19/encodeDCC/wgEncodeAwgTfbsUniform/wgEncodeAwgTfbsSydhH1hescRad21IggrabUniPk.narrowPeak.gz
H1-hESC	RBBP5	Broad	http://hgdownload.cse.ucsc.edu/goldenPath/hg19/encodeDCC/wgEncodeAwgTfbsUniform/wgEncodeAwgTfbsBroadH1hescRbbp5a300109aUniPk.narrowPeak.gz
H1-hESC	REST	HudsonAlpha	http://hgdownload.cse.ucsc.edu/goldenPath/hg19/encodeDCC/wgEncodeAwgTfbsUniform/wgEncodeAwgTfbsHaibH1hescNrsfV0416102UniPk.narrowPeak.gz
H1-hESC	RFX5	Stanford	http://hgdownload.cse.ucsc.edu/goldenPath/hg19/encodeDCC/wgEncodeAwgTfbsUniform/wgEncodeAwgTfbsSydhH1hescRfx5200401194IggrabUniPk.narrowPeak.gz
H1-hESC	RXRA	HudsonAlpha	http://hgdownload.cse.ucsc.edu/goldenPath/hg19/encodeDCC/wgEncodeAwgTfbsUniform/wgEncodeAwgTfbsHaibH1hescRxraV0416102UniPk.narrowPeak.gz
H1-hESC	SIN3A	Stanford	http://hgdownload.cse.ucsc.edu/goldenPath/hg19/encodeDCC/wgEncodeAwgTfbsUniform/wgEncodeAwgTfbsSydhH1hescSin3anb6001263IggrabUniPk.narrowPeak.gz
H1-hESC	SIN3AK20	HudsonAlpha	http://hgdownload.cse.ucsc.edu/goldenPath/hg19/encodeDCC/wgEncodeAwgTfbsUniform/wgEncodeAwgTfbsHaibH1hescSin3ak20Pcr1xUniPk.narrowPeak.gz
H1-hESC	SIX5	HudsonAlpha	http://hgdownload.cse.ucsc.edu/goldenPath/hg19/encodeDCC/wgEncodeAwgTfbsUniform/wgEncodeAwgTfbsHaibH1hescSix5Pcr1xUniPk.narrowPeak.gz
H1-hESC	SP1	HudsonAlpha	http://hgdownload.cse.ucsc.edu/goldenPath/hg19/encodeDCC/wgEncodeAwgTfbsUniform/wgEncodeAwgTfbsHaibH1hescSp1Pcr1xUniPk.narrowPeak.gz
H1-hESC	SP2	HudsonAlpha	http://hgdownload.cse.ucsc.edu/goldenPath/hg19/encodeDCC/wgEncodeAwgTfbsUniform/wgEncodeAwgTfbsHaibH1hescSp2V0422111UniPk.narrowPeak.gz
H1-hESC	SP4	HudsonAlpha	http://hgdownload.cse.ucsc.edu/goldenPath/hg19/encodeDCC/wgEncodeAwgTfbsUniform/wgEncodeAwgTfbsHaibH1hescSp4v20V0422111UniPk.narrowPeak.gz
H1-hESC	SRF	HudsonAlpha	http://hgdownload.cse.ucsc.edu/goldenPath/hg19/encodeDCC/wgEncodeAwgTfbsUniform/wgEncodeAwgTfbsHaibH1hescSrfPcr1xUniPk.narrowPeak.gz
H1-hESC	SUZ12	USC	http://hgdownload.cse.ucsc.edu/goldenPath/hg19/encodeDCC/wgEncodeAwgTfbsUniform/wgEncodeAwgTfbsSydhH1hescSuz12UcdUniPk.narrowPeak.gz
H1-hESC	TAF1	HudsonAlpha	http://hgdownload.cse.ucsc.edu/goldenPath/hg19/encodeDCC/wgEncodeAwgTfbsUniform/wgEncodeAwgTfbsHaibH1hescTaf1V0416102UniPk.narrowPeak.gz
H1-hESC	TAF7	HudsonAlpha	http://hgdownload.cse.ucsc.edu/goldenPath/hg19/encodeDCC/wgEncodeAwgTfbsUniform/wgEncodeAwgTfbsHaibH1hescTaf7sc101167V0416102UniPk.narrowPeak.gz
H1-hESC	TBP	Stanford	http://hgdownload.cse.ucsc.edu/goldenPath/hg19/encodeDCC/wgEncodeAwgTfbsUniform/wgEncodeAwgTfbsSydhH1hescTbpIggrabUniPk.narrowPeak.gz
H1-hESC	TCF12	HudsonAlpha	http://hgdownload.cse.ucsc.edu/goldenPath/hg19/encodeDCC/wgEncodeAwgTfbsUniform/wgEncodeAwgTfbsHaibH1hescTcf12Pcr1xUniPk.narrowPeak.gz
H1-hESC	TEAD4	HudsonAlpha	http://hgdownload.cse.ucsc.edu/goldenPath/hg19/encodeDCC/wgEncodeAwgTfbsUniform/wgEncodeAwgTfbsHaibH1hescTead4sc101184V0422111UniPk.narrowPeak.gz
H1-hESC	USF1	HudsonAlpha	http://hgdownload.cse.ucsc.edu/goldenPath/hg19/encodeDCC/wgEncodeAwgTfbsUniform/wgEncodeAwgTfbsHaibH1hescUsf1Pcr1xUniPk.narrowPeak.gz
H1-hESC	USF2	Stanford	http://hgdownload.cse.ucsc.edu/goldenPath/hg19/encodeDCC/wgEncodeAwgTfbsUniform/wgEncodeAwgTfbsSydhH1hescUsf2IggrabUniPk.narrowPeak.gz
H1-hESC	YY1	HudsonAlpha	http://hgdownload.cse.ucsc.edu/goldenPath/hg19/encodeDCC/wgEncodeAwgTfbsUniform/wgEncodeAwgTfbsHaibH1hescYy1sc281V0416102UniPk.narrowPeak.gz
H1-hESC	ZNF143	Stanford	http://hgdownload.cse.ucsc.edu/goldenPath/hg19/encodeDCC/wgEncodeAwgTfbsUniform/wgEncodeAwgTfbsSydhH1hescZnf143IggrabUniPk.narrowPeak.gz
HA-sp	CTCF	UW	http://hgdownload.cse.ucsc.edu/goldenPath/hg19/encodeDCC/wgEncodeAwgTfbsUniform/wgEncodeAwgTfbsUwHaspCtcfUniPk.narrowPeak.gz
HAc	CTCF	UW	http://hgdownload.cse.ucsc.edu/goldenPath/hg19/encodeDCC/wgEncodeAwgTfbsUniform/wgEncodeAwgTfbsUwHacCtcfUniPk.narrowPeak.gz
HBMEC	CTCF	UW	http://hgdownload.cse.ucsc.edu/goldenPath/hg19/encodeDCC/wgEncodeAwgTfbsUniform/wgEncodeAwgTfbsUwHbmecCtcfUniPk.narrowPeak.gz
HCFaa	CTCF	UW	http://hgdownload.cse.ucsc.edu/goldenPath/hg19/encodeDCC/wgEncodeAwgTfbsUniform/wgEncodeAwgTfbsUwHcfaaCtcfUniPk.narrowPeak.gz
HCM	CTCF	UW	http://hgdownload.cse.ucsc.edu/goldenPath/hg19/encodeDCC/wgEncodeAwgTfbsUniform/wgEncodeAwgTfbsUwHcmCtcfUniPk.narrowPeak.gz
HCPEpiC	CTCF	UW	http://hgdownload.cse.ucsc.edu/goldenPath/hg19/encodeDCC/wgEncodeAwgTfbsUniform/wgEncodeAwgTfbsUwHcpeCtcfUniPk.narrowPeak.gz
HCT-116	CTCF	UW	http://hgdownload.cse.ucsc.edu/goldenPath/hg19/encodeDCC/wgEncodeAwgTfbsUniform/wgEncodeAwgTfbsUwHct116CtcfUniPk.narrowPeak.gz
HCT-116	POLR2A	HudsonAlpha	http://hgdownload.cse.ucsc.edu/goldenPath/hg19/encodeDCC/wgEncodeAwgTfbsUniform/wgEncodeAwgTfbsHaibHct116Pol24h8V0416101UniPk.narrowPeak.gz
HCT-116	POLR2A	USC	http://hgdownload.cse.ucsc.edu/goldenPath/hg19/encodeDCC/wgEncodeAwgTfbsUniform/wgEncodeAwgTfbsSydhHct116Pol2UcdUniPk.narrowPeak.gz
HCT-116	TCF7L2	USC	http://hgdownload.cse.ucsc.edu/goldenPath/hg19/encodeDCC/wgEncodeAwgTfbsUniform/wgEncodeAwgTfbsSydhHct116Tcf7l2UcdUniPk.narrowPeak.gz
HCT-116	YY1	HudsonAlpha	http://hgdownload.cse.ucsc.edu/goldenPath/hg19/encodeDCC/wgEncodeAwgTfbsUniform/wgEncodeAwgTfbsHaibHct116Yy1sc281V0416101UniPk.narrowPeak.gz
HCT-116	ZBTB33	HudsonAlpha	http://hgdownload.cse.ucsc.edu/goldenPath/hg19/encodeDCC/wgEncodeAwgTfbsUniform/wgEncodeAwgTfbsHaibHct116Zbtb33V0416101UniPk.narrowPeak.gz
HEEpiC	CTCF	UW	http://hgdownload.cse.ucsc.edu/goldenPath/hg19/encodeDCC/wgEncodeAwgTfbsUniform/wgEncodeAwgTfbsUwHeeCtcfUniPk.narrowPeak.gz
HEK293	CTCF	UW	http://hgdownload.cse.ucsc.edu/goldenPath/hg19/encodeDCC/wgEncodeAwgTfbsUniform/wgEncodeAwgTfbsUwHek293CtcfUniPk.narrowPeak.gz
HEK293	ELK4	USC	http://hgdownload.cse.ucsc.edu/goldenPath/hg19/encodeDCC/wgEncodeAwgTfbsUniform/wgEncodeAwgTfbsSydhHek293Elk4UcdUniPk.narrowPeak.gz
HEK293	KAP1	USC	http://hgdownload.cse.ucsc.edu/goldenPath/hg19/encodeDCC/wgEncodeAwgTfbsUniform/wgEncodeAwgTfbsSydhHek293Kap1UcdUniPk.narrowPeak.gz
HEK293	POLR2A	Yale	http://hgdownload.cse.ucsc.edu/goldenPath/hg19/encodeDCC/wgEncodeAwgTfbsUniform/wgEncodeAwgTfbsSydhHek293Pol2UniPk.narrowPeak.gz
HEK293	TCF7L2	USC	http://hgdownload.cse.ucsc.edu/goldenPath/hg19/encodeDCC/wgEncodeAwgTfbsUniform/wgEncodeAwgTfbsSydhHek293Tcf7l2UcdUniPk.narrowPeak.gz
HEK293-T-REx	ZNF263	USC	http://hgdownload.cse.ucsc.edu/goldenPath/hg19/encodeDCC/wgEncodeAwgTfbsUniform/wgEncodeAwgTfbsSydhHek293tZnf263UcdUniPk.narrowPeak.gz
HeLa-S3	BDP1	Harvard	http://hgdownload.cse.ucsc.edu/goldenPath/hg19/encodeDCC/wgEncodeAwgTfbsUniform/wgEncodeAwgTfbsSydhHelas3Bdp1UniPk.narrowPeak.gz
HeLa-S3	BRCA1	Stanford	http://hgdownload.cse.ucsc.edu/goldenPath/hg19/encodeDCC/wgEncodeAwgTfbsUniform/wgEncodeAwgTfbsSydhHelas3Brca1a300IggrabUniPk.narrowPeak.gz
HeLa-S3	BRF1	Harvard	http://hgdownload.cse.ucsc.edu/goldenPath/hg19/encodeDCC/wgEncodeAwgTfbsUniform/wgEncodeAwgTfbsSydhHelas3Brf1UniPk.narrowPeak.gz
HeLa-S3	BRF2	Harvard	http://hgdownload.cse.ucsc.edu/goldenPath/hg19/encodeDCC/wgEncodeAwgTfbsUniform/wgEncodeAwgTfbsSydhHelas3Brf2UniPk.narrowPeak.gz
HeLa-S3	CEBPB	Stanford	http://hgdownload.cse.ucsc.edu/goldenPath/hg19/encodeDCC/wgEncodeAwgTfbsUniform/wgEncodeAwgTfbsSydhHelas3CebpbIggrabUniPk.narrowPeak.gz
HeLa-S3	CHD2	Stanford	http://hgdownload.cse.ucsc.edu/goldenPath/hg19/encodeDCC/wgEncodeAwgTfbsUniform/wgEncodeAwgTfbsSydhHelas3Chd2IggrabUniPk.narrowPeak.gz
HeLa-S3	CTCF	Broad	http://hgdownload.cse.ucsc.edu/goldenPath/hg19/encodeDCC/wgEncodeAwgTfbsUniform/wgEncodeAwgTfbsBroadHelas3CtcfUniPk.narrowPeak.gz
HeLa-S3	CTCF	UT-A	http://hgdownload.cse.ucsc.edu/goldenPath/hg19/encodeDCC/wgEncodeAwgTfbsUniform/wgEncodeAwgTfbsUtaHelas3CtcfUniPk.narrowPeak.gz
HeLa-S3	CTCF	UW	http://hgdownload.cse.ucsc.edu/goldenPath/hg19/encodeDCC/wgEncodeAwgTfbsUniform/wgEncodeAwgTfbsUwHelas3CtcfUniPk.narrowPeak.gz
HeLa-S3	E2F1	USC	http://hgdownload.cse.ucsc.edu/goldenPath/hg19/encodeDCC/wgEncodeAwgTfbsUniform/wgEncodeAwgTfbsSydhHelas3E2f1UniPk.narrowPeak.gz
HeLa-S3	E2F1	USC	http://hgdownload.cse.ucsc.edu/goldenPath/hg19/encodeDCC/wgEncodeAwgTfbsUniform/wgEncodeAwgTfbsSydhHelas3Hae2f1UniPk.narrowPeak.gz
HeLa-S3	E2F4	USC	http://hgdownload.cse.ucsc.edu/goldenPath/hg19/encodeDCC/wgEncodeAwgTfbsUniform/wgEncodeAwgTfbsSydhHelas3E2f4UniPk.narrowPeak.gz
HeLa-S3	E2F6	USC	http://hgdownload.cse.ucsc.edu/goldenPath/hg19/encodeDCC/wgEncodeAwgTfbsUniform/wgEncodeAwgTfbsSydhHelas3E2f6UniPk.narrowPeak.gz
HeLa-S3	ELK1	Stanford	http://hgdownload.cse.ucsc.edu/goldenPath/hg19/encodeDCC/wgEncodeAwgTfbsUniform/wgEncodeAwgTfbsSydhHelas3Elk112771IggrabUniPk.narrowPeak.gz
HeLa-S3	ELK4	USC	http://hgdownload.cse.ucsc.edu/goldenPath/hg19/encodeDCC/wgEncodeAwgTfbsUniform/wgEncodeAwgTfbsSydhHelas3Elk4UcdUniPk.narrowPeak.gz
HeLa-S3	EP300	Stanford	http://hgdownload.cse.ucsc.edu/goldenPath/hg19/encodeDCC/wgEncodeAwgTfbsUniform/wgEncodeAwgTfbsSydhHelas3P300sc584sc584IggrabUniPk.narrowPeak.gz
HeLa-S3	EZH2	Broad	http://hgdownload.cse.ucsc.edu/goldenPath/hg19/encodeDCC/wgEncodeAwgTfbsUniform/wgEncodeAwgTfbsBroadHelas3Ezh239875UniPk.narrowPeak.gz
HeLa-S3	FAM48A	Stanford	http://hgdownload.cse.ucsc.edu/goldenPath/hg19/encodeDCC/wgEncodeAwgTfbsUniform/wgEncodeAwgTfbsSydhHelas3Spt20UniPk.narrowPeak.gz
HeLa-S3	FOS	Yale	http://hgdownload.cse.ucsc.edu/goldenPath/hg19/encodeDCC/wgEncodeAwgTfbsUniform/wgEncodeAwgTfbsSydhHelas3CfosUniPk.narrowPeak.gz
HeLa-S3	GABPA	HudsonAlpha	http://hgdownload.cse.ucsc.edu/goldenPath/hg19/encodeDCC/wgEncodeAwgTfbsUniform/wgEncodeAwgTfbsHaibHelas3GabpPcr1xUniPk.narrowPeak.gz
HeLa-S3	GTF2F1	Stanford	http://hgdownload.cse.ucsc.edu/goldenPath/hg19/encodeDCC/wgEncodeAwgTfbsUniform/wgEncodeAwgTfbsSydhHelas3Gtf2f1ab28179IggrabUniPk.narrowPeak.gz
HeLa-S3	GTF3C2	Harvard	http://hgdownload.cse.ucsc.edu/goldenPath/hg19/encodeDCC/wgEncodeAwgTfbsUniform/wgEncodeAwgTfbsSydhHelas3Tf3c110UniPk.narrowPeak.gz
HeLa-S3	IRF3	Stanford	http://hgdownload.cse.ucsc.edu/goldenPath/hg19/encodeDCC/wgEncodeAwgTfbsUniform/wgEncodeAwgTfbsSydhHelas3Irf3IggrabUniPk.narrowPeak.gz
HeLa-S3	JUN	Stanford	http://hgdownload.cse.ucsc.edu/goldenPath/hg19/encodeDCC/wgEncodeAwgTfbsUniform/wgEncodeAwgTfbsSydhHelas3CjunIggrabUniPk.narrowPeak.gz
HeLa-S3	JUND	Stanford	http://hgdownload.cse.ucsc.edu/goldenPath/hg19/encodeDCC/wgEncodeAwgTfbsUniform/wgEncodeAwgTfbsSydhHelas3JundIggrabUniPk.narrowPeak.gz
HeLa-S3	MAFK	Stanford	http://hgdownload.cse.ucsc.edu/goldenPath/hg19/encodeDCC/wgEncodeAwgTfbsUniform/wgEncodeAwgTfbsSydhHelas3MafkIggrabUniPk.narrowPeak.gz
HeLa-S3	MAX	Stanford	http://hgdownload.cse.ucsc.edu/goldenPath/hg19/encodeDCC/wgEncodeAwgTfbsUniform/wgEncodeAwgTfbsSydhHelas3MaxIggrabUniPk.narrowPeak.gz
HeLa-S3	MAZ	Stanford	http://hgdownload.cse.ucsc.edu/goldenPath/hg19/encodeDCC/wgEncodeAwgTfbsUniform/wgEncodeAwgTfbsSydhHelas3Mazab85725IggrabUniPk.narrowPeak.gz
HeLa-S3	MXI1	Stanford	http://hgdownload.cse.ucsc.edu/goldenPath/hg19/encodeDCC/wgEncodeAwgTfbsUniform/wgEncodeAwgTfbsSydhHelas3Mxi1af4185IggrabUniPk.narrowPeak.gz
HeLa-S3	MYC	UT-A	http://hgdownload.cse.ucsc.edu/goldenPath/hg19/encodeDCC/wgEncodeAwgTfbsUniform/wgEncodeAwgTfbsUtaHelas3CmycUniPk.narrowPeak.gz
HeLa-S3	MYC	Yale	http://hgdownload.cse.ucsc.edu/goldenPath/hg19/encodeDCC/wgEncodeAwgTfbsUniform/wgEncodeAwgTfbsSydhHelas3CmycUniPk.narrowPeak.gz
HeLa-S3	NFYA	Harvard	http://hgdownload.cse.ucsc.edu/goldenPath/hg19/encodeDCC/wgEncodeAwgTfbsUniform/wgEncodeAwgTfbsSydhHelas3NfyaIggrabUniPk.narrowPeak.gz
HeLa-S3	NFYB	Harvard	http://hgdownload.cse.ucsc.edu/goldenPath/hg19/encodeDCC/wgEncodeAwgTfbsUniform/wgEncodeAwgTfbsSydhHelas3NfybIggrabUniPk.narrowPeak.gz
HeLa-S3	NR2C2	USC	http://hgdownload.cse.ucsc.edu/goldenPath/hg19/encodeDCC/wgEncodeAwgTfbsUniform/wgEncodeAwgTfbsSydhHelas3Tr4UniPk.narrowPeak.gz
HeLa-S3	NRF1	Stanford	http://hgdownload.cse.ucsc.edu/goldenPath/hg19/encodeDCC/wgEncodeAwgTfbsUniform/wgEncodeAwgTfbsSydhHelas3Nrf1IggmusUniPk.narrowPeak.gz
HeLa-S3	POLR2A	Broad	http://hgdownload.cse.ucsc.edu/goldenPath/hg19/encodeDCC/wgEncodeAwgTfbsUniform/wgEncodeAwgTfbsBroadHelas3Pol2bUniPk.narrowPeak.gz
HeLa-S3	POLR2A	HudsonAlpha	http://hgdownload.cse.ucsc.edu/goldenPath/hg19/encodeDCC/wgEncodeAwgTfbsUniform/wgEncodeAwgTfbsHaibHelas3Pol2Pcr1xUniPk.narrowPeak.gz
HeLa-S3	POLR2A	Stanford	http://hgdownload.cse.ucsc.edu/goldenPath/hg19/encodeDCC/wgEncodeAwgTfbsUniform/wgEncodeAwgTfbsSydhHelas3Pol2s2IggrabUniPk.narrowPeak.gz
HeLa-S3	POLR2A	UT-A	http://hgdownload.cse.ucsc.edu/goldenPath/hg19/encodeDCC/wgEncodeAwgTfbsUniform/wgEncodeAwgTfbsUtaHelas3Pol2UniPk.narrowPeak.gz
HeLa-S3	POLR2A	Yale	http://hgdownload.cse.ucsc.edu/goldenPath/hg19/encodeDCC/wgEncodeAwgTfbsUniform/wgEncodeAwgTfbsSydhHelas3Pol2UniPk.narrowPeak.gz
HeLa-S3	PRDM1	Stanford	http://hgdownload.cse.ucsc.edu/goldenPath/hg19/encodeDCC/wgEncodeAwgTfbsUniform/wgEncodeAwgTfbsSydhHelas3Prdm19115IggrabUniPk.narrowPeak.gz
HeLa-S3	RAD21	Stanford	http://hgdownload.cse.ucsc.edu/goldenPath/hg19/encodeDCC/wgEncodeAwgTfbsUniform/wgEncodeAwgTfbsSydhHelas3Rad21IggrabUniPk.narrowPeak.gz
HeLa-S3	RCOR1	Stanford	http://hgdownload.cse.ucsc.edu/goldenPath/hg19/encodeDCC/wgEncodeAwgTfbsUniform/wgEncodeAwgTfbsSydhHelas3Corestsc30189IggrabUniPk.narrowPeak.gz
HeLa-S3	REST	HudsonAlpha	http://hgdownload.cse.ucsc.edu/goldenPath/hg19/encodeDCC/wgEncodeAwgTfbsUniform/wgEncodeAwgTfbsHaibHelas3NrsfPcr1xUniPk.narrowPeak.gz
HeLa-S3	RFX5	Stanford	http://hgdownload.cse.ucsc.edu/goldenPath/hg19/encodeDCC/wgEncodeAwgTfbsUniform/wgEncodeAwgTfbsSydhHelas3Rfx5200401194IggrabUniPk.narrowPeak.gz
HeLa-S3	RPC155	Harvard	http://hgdownload.cse.ucsc.edu/goldenPath/hg19/encodeDCC/wgEncodeAwgTfbsUniform/wgEncodeAwgTfbsSydhHelas3Rpc155UniPk.narrowPeak.gz
HeLa-S3	SMARCA4	Yale	http://hgdownload.cse.ucsc.edu/goldenPath/hg19/encodeDCC/wgEncodeAwgTfbsUniform/wgEncodeAwgTfbsSydhHelas3Brg1IggmusUniPk.narrowPeak.gz
HeLa-S3	SMARCB1	Stanford	http://hgdownload.cse.ucsc.edu/goldenPath/hg19/encodeDCC/wgEncodeAwgTfbsUniform/wgEncodeAwgTfbsSydhHelas3Ini1IggmusUniPk.narrowPeak.gz
HeLa-S3	SMARCC1	Stanford	http://hgdownload.cse.ucsc.edu/goldenPath/hg19/encodeDCC/wgEncodeAwgTfbsUniform/wgEncodeAwgTfbsSydhHelas3Baf155IggmusUniPk.narrowPeak.gz
HeLa-S3	SMARCC2	Stanford	http://hgdownload.cse.ucsc.edu/goldenPath/hg19/encodeDCC/wgEncodeAwgTfbsUniform/wgEncodeAwgTfbsSydhHelas3Baf170IggmusUniPk.narrowPeak.gz
HeLa-S3	SMC3	Stanford	http://hgdownload.cse.ucsc.edu/goldenPath/hg19/encodeDCC/wgEncodeAwgTfbsUniform/wgEncodeAwgTfbsSydhHelas3Smc3ab9263IggrabUniPk.narrowPeak.gz
HeLa-S3	STAT1	Yale	http://hgdownload.cse.ucsc.edu/goldenPath/hg19/encodeDCC/wgEncodeAwgTfbsUniform/wgEncodeAwgTfbsSydhHelas3Stat1Ifng30UniPk.narrowPeak.gz
HeLa-S3	STAT3	Stanford	http://hgdownload.cse.ucsc.edu/goldenPath/hg19/encodeDCC/wgEncodeAwgTfbsUniform/wgEncodeAwgTfbsSydhHelas3Stat3IggrabUniPk.narrowPeak.gz
HeLa-S3	TAF1	HudsonAlpha	http://hgdownload.cse.ucsc.edu/goldenPath/hg19/encodeDCC/wgEncodeAwgTfbsUniform/wgEncodeAwgTfbsHaibHelas3Taf1Pcr1xUniPk.narrowPeak.gz
HeLa-S3	TBP	Stanford	http://hgdownload.cse.ucsc.edu/goldenPath/hg19/encodeDCC/wgEncodeAwgTfbsUniform/wgEncodeAwgTfbsSydhHelas3TbpIggrabUniPk.narrowPeak.gz
HeLa-S3	TCF7L2	USC	http://hgdownload.cse.ucsc.edu/goldenPath/hg19/encodeDCC/wgEncodeAwgTfbsUniform/wgEncodeAwgTfbsSydhHelas3Tcf7l2c9b92565UcdUniPk.narrowPeak.gz
HeLa-S3	TCF7L2	USC	http://hgdownload.cse.ucsc.edu/goldenPath/hg19/encodeDCC/wgEncodeAwgTfbsUniform/wgEncodeAwgTfbsSydhHelas3Tcf7l2UcdUniPk.narrowPeak.gz
HeLa-S3	TFAP2A	USC	http://hgdownload.cse.ucsc.edu/goldenPath/hg19/encodeDCC/wgEncodeAwgTfbsUniform/wgEncodeAwgTfbsSydhHelas3Ap2alphaUniPk.narrowPeak.gz
HeLa-S3	TFAP2C	USC	http://hgdownload.cse.ucsc.edu/goldenPath/hg19/encodeDCC/wgEncodeAwgTfbsUniform/wgEncodeAwgTfbsSydhHelas3Ap2gammaUniPk.narrowPeak.gz
HeLa-S3	USF2	Stanford	http://hgdownload.cse.ucsc.edu/goldenPath/hg19/encodeDCC/wgEncodeAwgTfbsUniform/wgEncodeAwgTfbsSydhHelas3Usf2IggmusUniPk.narrowPeak.gz
HeLa-S3	ZKSCAN1	Stanford	http://hgdownload.cse.ucsc.edu/goldenPath/hg19/encodeDCC/wgEncodeAwgTfbsUniform/wgEncodeAwgTfbsSydhHelas3Zkscan1hpa006672IggrabUniPk.narrowPeak.gz
HeLa-S3	ZNF143	Stanford	http://hgdownload.cse.ucsc.edu/goldenPath/hg19/encodeDCC/wgEncodeAwgTfbsUniform/wgEncodeAwgTfbsSydhHelas3Znf143IggrabUniPk.narrowPeak.gz
HeLa-S3	ZNF274	USC	http://hgdownload.cse.ucsc.edu/goldenPath/hg19/encodeDCC/wgEncodeAwgTfbsUniform/wgEncodeAwgTfbsSydhHelas3Znf274UcdUniPk.narrowPeak.gz
HeLa-S3	ZZZ3	Harvard	http://hgdownload.cse.ucsc.edu/goldenPath/hg19/encodeDCC/wgEncodeAwgTfbsUniform/wgEncodeAwgTfbsSydhHelas3Zzz3UniPk.narrowPeak.gz
HepG2	ARID3A	Stanford	http://hgdownload.cse.ucsc.edu/goldenPath/hg19/encodeDCC/wgEncodeAwgTfbsUniform/wgEncodeAwgTfbsSydhHepg2Arid3anb100279IggrabUniPk.narrowPeak.gz
HepG2	ATF3	HudsonAlpha	http://hgdownload.cse.ucsc.edu/goldenPath/hg19/encodeDCC/wgEncodeAwgTfbsUniform/wgEncodeAwgTfbsHaibHepg2Atf3V0416101UniPk.narrowPeak.gz
HepG2	BHLHE40	HudsonAlpha	http://hgdownload.cse.ucsc.edu/goldenPath/hg19/encodeDCC/wgEncodeAwgTfbsUniform/wgEncodeAwgTfbsHaibHepg2Bhlhe40V0416101UniPk.narrowPeak.gz
HepG2	BHLHE40	Stanford	http://hgdownload.cse.ucsc.edu/goldenPath/hg19/encodeDCC/wgEncodeAwgTfbsUniform/wgEncodeAwgTfbsSydhHepg2Bhlhe40cIggrabUniPk.narrowPeak.gz
HepG2	BRCA1	Stanford	http://hgdownload.cse.ucsc.edu/goldenPath/hg19/encodeDCC/wgEncodeAwgTfbsUniform/wgEncodeAwgTfbsSydhHepg2Brca1a300IggrabUniPk.narrowPeak.gz
HepG2	CEBPB	HudsonAlpha	http://hgdownload.cse.ucsc.edu/goldenPath/hg19/encodeDCC/wgEncodeAwgTfbsUniform/wgEncodeAwgTfbsHaibHepg2Cebpbsc150V0416101UniPk.narrowPeak.gz
HepG2	CEBPB	Stanford	http://hgdownload.cse.ucsc.edu/goldenPath/hg19/encodeDCC/wgEncodeAwgTfbsUniform/wgEncodeAwgTfbsSydhHepg2CebpbForsklnUniPk.narrowPeak.gz
HepG2	CEBPB	Stanford	http://hgdownload.cse.ucsc.edu/goldenPath/hg19/encodeDCC/wgEncodeAwgTfbsUniform/wgEncodeAwgTfbsSydhHepg2CebpbIggrabUniPk.narrowPeak.gz
HepG2	CEBPD	HudsonAlpha	http://hgdownload.cse.ucsc.edu/goldenPath/hg19/encodeDCC/wgEncodeAwgTfbsUniform/wgEncodeAwgTfbsHaibHepg2Cebpdsc636V0416101UniPk.narrowPeak.gz
HepG2	CHD2	Stanford	http://hgdownload.cse.ucsc.edu/goldenPath/hg19/encodeDCC/wgEncodeAwgTfbsUniform/wgEncodeAwgTfbsSydhHepg2Chd2ab68301IggrabUniPk.narrowPeak.gz
HepG2	CTCF	Broad	http://hgdownload.cse.ucsc.edu/goldenPath/hg19/encodeDCC/wgEncodeAwgTfbsUniform/wgEncodeAwgTfbsBroadHepg2CtcfUniPk.narrowPeak.gz
HepG2	CTCF	HudsonAlpha	http://hgdownload.cse.ucsc.edu/goldenPath/hg19/encodeDCC/wgEncodeAwgTfbsUniform/wgEncodeAwgTfbsHaibHepg2Ctcfsc5916V0416101UniPk.narrowPeak.gz
HepG2	CTCF	UT-A	http://hgdownload.cse.ucsc.edu/goldenPath/hg19/encodeDCC/wgEncodeAwgTfbsUniform/wgEncodeAwgTfbsUtaHepg2CtcfUniPk.narrowPeak.gz
HepG2	CTCF	UW	http://hgdownload.cse.ucsc.edu/goldenPath/hg19/encodeDCC/wgEncodeAwgTfbsUniform/wgEncodeAwgTfbsUwHepg2CtcfUniPk.narrowPeak.gz
HepG2	ELF1	HudsonAlpha	http://hgdownload.cse.ucsc.edu/goldenPath/hg19/encodeDCC/wgEncodeAwgTfbsUniform/wgEncodeAwgTfbsHaibHepg2Elf1sc631V0416101UniPk.narrowPeak.gz
HepG2	EP300	HudsonAlpha	http://hgdownload.cse.ucsc.edu/goldenPath/hg19/encodeDCC/wgEncodeAwgTfbsUniform/wgEncodeAwgTfbsHaibHepg2P300V0416101UniPk.narrowPeak.gz
HepG2	EP300	Stanford	http://hgdownload.cse.ucsc.edu/goldenPath/hg19/encodeDCC/wgEncodeAwgTfbsUniform/wgEncodeAwgTfbsSydhHepg2P300sc582IggrabUniPk.narrowPeak.gz
HepG2	ESRRA	Stanford	http://hgdownload.cse.ucsc.edu/goldenPath/hg19/encodeDCC/wgEncodeAwgTfbsUniform/wgEncodeAwgTfbsSydhHepg2ErraForsklnUniPk.narrowPeak.gz
HepG2	EZH2	Broad	http://hgdownload.cse.ucsc.edu/goldenPath/hg19/encodeDCC/wgEncodeAwgTfbsUniform/wgEncodeAwgTfbsBroadHepg2Ezh239875UniPk.narrowPeak.gz
HepG2	FOSL2	HudsonAlpha	http://hgdownload.cse.ucsc.edu/goldenPath/hg19/encodeDCC/wgEncodeAwgTfbsUniform/wgEncodeAwgTfbsHaibHepg2Fosl2V0416101UniPk.narrowPeak.gz
HepG2	FOXA1	HudsonAlpha	http://hgdownload.cse.ucsc.edu/goldenPath/hg19/encodeDCC/wgEncodeAwgTfbsUniform/wgEncodeAwgTfbsHaibHepg2Foxa1sc101058V0416101UniPk.narrowPeak.gz
HepG2	FOXA1	HudsonAlpha	http://hgdownload.cse.ucsc.edu/goldenPath/hg19/encodeDCC/wgEncodeAwgTfbsUniform/wgEncodeAwgTfbsHaibHepg2Foxa1sc6553V0416101UniPk.narrowPeak.gz
HepG2	FOXA2	HudsonAlpha	http://hgdownload.cse.ucsc.edu/goldenPath/hg19/encodeDCC/wgEncodeAwgTfbsUniform/wgEncodeAwgTfbsHaibHepg2Foxa2sc6554V0416101UniPk.narrowPeak.gz
HepG2	GABPA	HudsonAlpha	http://hgdownload.cse.ucsc.edu/goldenPath/hg19/encodeDCC/wgEncodeAwgTfbsUniform/wgEncodeAwgTfbsHaibHepg2GabpPcr2xUniPk.narrowPeak.gz
HepG2	GRp20	Stanford	http://hgdownload.cse.ucsc.edu/goldenPath/hg19/encodeDCC/wgEncodeAwgTfbsUniform/wgEncodeAwgTfbsSydhHepg2Grp20ForsklnUniPk.narrowPeak.gz
HepG2	HDAC2	HudsonAlpha	http://hgdownload.cse.ucsc.edu/goldenPath/hg19/encodeDCC/wgEncodeAwgTfbsUniform/wgEncodeAwgTfbsHaibHepg2Hdac2sc6296V0416101UniPk.narrowPeak.gz
HepG2	HNF4A	HudsonAlpha	http://hgdownload.cse.ucsc.edu/goldenPath/hg19/encodeDCC/wgEncodeAwgTfbsUniform/wgEncodeAwgTfbsHaibHepg2Hnf4asc8987V0416101UniPk.narrowPeak.gz
HepG2	HNF4A	Stanford	http://hgdownload.cse.ucsc.edu/goldenPath/hg19/encodeDCC/wgEncodeAwgTfbsUniform/wgEncodeAwgTfbsSydhHepg2Hnf4aForsklnUniPk.narrowPeak.gz
HepG2	HNF4G	HudsonAlpha	http://hgdownload.cse.ucsc.edu/goldenPath/hg19/encodeDCC/wgEncodeAwgTfbsUniform/wgEncodeAwgTfbsHaibHepg2Hnf4gsc6558V0416101UniPk.narrowPeak.gz
HepG2	HSF1	Stanford	http://hgdownload.cse.ucsc.edu/goldenPath/hg19/encodeDCC/wgEncodeAwgTfbsUniform/wgEncodeAwgTfbsSydhHepg2Hsf1ForsklnUniPk.narrowPeak.gz
HepG2	IRF3	Stanford	http://hgdownload.cse.ucsc.edu/goldenPath/hg19/encodeDCC/wgEncodeAwgTfbsUniform/wgEncodeAwgTfbsSydhHepg2Irf3IggrabUniPk.narrowPeak.gz
HepG2	JUN	Stanford	http://hgdownload.cse.ucsc.edu/goldenPath/hg19/encodeDCC/wgEncodeAwgTfbsUniform/wgEncodeAwgTfbsSydhHepg2CjunIggrabUniPk.narrowPeak.gz
HepG2	JUND	HudsonAlpha	http://hgdownload.cse.ucsc.edu/goldenPath/hg19/encodeDCC/wgEncodeAwgTfbsUniform/wgEncodeAwgTfbsHaibHepg2JundPcr1xUniPk.narrowPeak.gz
HepG2	JUND	Stanford	http://hgdownload.cse.ucsc.edu/goldenPath/hg19/encodeDCC/wgEncodeAwgTfbsUniform/wgEncodeAwgTfbsSydhHepg2JundIggrabUniPk.narrowPeak.gz
HepG2	MAFF	Stanford	http://hgdownload.cse.ucsc.edu/goldenPath/hg19/encodeDCC/wgEncodeAwgTfbsUniform/wgEncodeAwgTfbsSydhHepg2Maffm8194IggrabUniPk.narrowPeak.gz
HepG2	MAFK	Stanford	http://hgdownload.cse.ucsc.edu/goldenPath/hg19/encodeDCC/wgEncodeAwgTfbsUniform/wgEncodeAwgTfbsSydhHepg2Mafkab50322IggrabUniPk.narrowPeak.gz
HepG2	MAFK	Stanford	http://hgdownload.cse.ucsc.edu/goldenPath/hg19/encodeDCC/wgEncodeAwgTfbsUniform/wgEncodeAwgTfbsSydhHepg2Mafksc477IggrabUniPk.narrowPeak.gz
HepG2	MAX	Stanford	http://hgdownload.cse.ucsc.edu/goldenPath/hg19/encodeDCC/wgEncodeAwgTfbsUniform/wgEncodeAwgTfbsSydhHepg2MaxIggrabUniPk.narrowPeak.gz
HepG2	MAZ	Stanford	http://hgdownload.cse.ucsc.edu/goldenPath/hg19/encodeDCC/wgEncodeAwgTfbsUniform/wgEncodeAwgTfbsSydhHepg2Mazab85725IggrabUniPk.narrowPeak.gz
HepG2	MBD4	HudsonAlpha	http://hgdownload.cse.ucsc.edu/goldenPath/hg19/encodeDCC/wgEncodeAwgTfbsUniform/wgEncodeAwgTfbsHaibHepg2Mbd4sc271530V0422111UniPk.narrowPeak.gz
HepG2	MXI1	Stanford	http://hgdownload.cse.ucsc.edu/goldenPath/hg19/encodeDCC/wgEncodeAwgTfbsUniform/wgEncodeAwgTfbsSydhHepg2Mxi1UniPk.narrowPeak.gz
HepG2	MYBL2	HudsonAlpha	http://hgdownload.cse.ucsc.edu/goldenPath/hg19/encodeDCC/wgEncodeAwgTfbsUniform/wgEncodeAwgTfbsHaibHepg2Mybl2sc81192V0422111UniPk.narrowPeak.gz
HepG2	MYC	UT-A	http://hgdownload.cse.ucsc.edu/goldenPath/hg19/encodeDCC/wgEncodeAwgTfbsUniform/wgEncodeAwgTfbsUtaHepg2CmycUniPk.narrowPeak.gz
HepG2	NFIC	HudsonAlpha	http://hgdownload.cse.ucsc.edu/goldenPath/hg19/encodeDCC/wgEncodeAwgTfbsUniform/wgEncodeAwgTfbsHaibHepg2Nficsc81335V0422111UniPk.narrowPeak.gz
HepG2	NR2C2	USC	http://hgdownload.cse.ucsc.edu/goldenPath/hg19/encodeDCC/wgEncodeAwgTfbsUniform/wgEncodeAwgTfbsSydhHepg2Tr4UcdUniPk.narrowPeak.gz
HepG2	NRF1	Stanford	http://hgdownload.cse.ucsc.edu/goldenPath/hg19/encodeDCC/wgEncodeAwgTfbsUniform/wgEncodeAwgTfbsSydhHepg2Nrf1IggrabUniPk.narrowPeak.gz
HepG2	POLR2A	HudsonAlpha	http://hgdownload.cse.ucsc.edu/goldenPath/hg19/encodeDCC/wgEncodeAwgTfbsUniform/wgEncodeAwgTfbsHaibHepg2Pol24h8V0416102UniPk.narrowPeak.gz
HepG2	POLR2A	HudsonAlpha	http://hgdownload.cse.ucsc.edu/goldenPath/hg19/encodeDCC/wgEncodeAwgTfbsUniform/wgEncodeAwgTfbsHaibHepg2Pol2Pcr2xUniPk.narrowPeak.gz
HepG2	POLR2A	Stanford	http://hgdownload.cse.ucsc.edu/goldenPath/hg19/encodeDCC/wgEncodeAwgTfbsUniform/wgEncodeAwgTfbsSydhHepg2Pol2ForsklnUniPk.narrowPeak.gz
HepG2	POLR2A	Stanford	http://hgdownload.cse.ucsc.edu/goldenPath/hg19/encodeDCC/wgEncodeAwgTfbsUniform/wgEncodeAwgTfbsSydhHepg2Pol2IggrabUniPk.narrowPeak.gz
HepG2	POLR2A	Stanford	http://hgdownload.cse.ucsc.edu/goldenPath/hg19/encodeDCC/wgEncodeAwgTfbsUniform/wgEncodeAwgTfbsSydhHepg2Pol2s2IggrabUniPk.narrowPeak.gz
HepG2	POLR2A	UT-A	http://hgdownload.cse.ucsc.edu/goldenPath/hg19/encodeDCC/wgEncodeAwgTfbsUniform/wgEncodeAwgTfbsUtaHepg2Pol2UniPk.narrowPeak.gz
HepG2	PPARGC1A	Stanford	http://hgdownload.cse.ucsc.edu/goldenPath/hg19/encodeDCC/wgEncodeAwgTfbsUniform/wgEncodeAwgTfbsSydhHepg2Pgc1aForsklnUniPk.narrowPeak.gz
HepG2	RAD21	HudsonAlpha	http://hgdownload.cse.ucsc.edu/goldenPath/hg19/encodeDCC/wgEncodeAwgTfbsUniform/wgEncodeAwgTfbsHaibHepg2Rad21V0416101UniPk.narrowPeak.gz
HepG2	RAD21	Stanford	http://hgdownload.cse.ucsc.edu/goldenPath/hg19/encodeDCC/wgEncodeAwgTfbsUniform/wgEncodeAwgTfbsSydhHepg2Rad21IggrabUniPk.narrowPeak.gz
HepG2	RCOR1	Stanford	http://hgdownload.cse.ucsc.edu/goldenPath/hg19/encodeDCC/wgEncodeAwgTfbsUniform/wgEncodeAwgTfbsSydhHepg2Corestsc30189IggrabUniPk.narrowPeak.gz
HepG2	REST	HudsonAlpha	http://hgdownload.cse.ucsc.edu/goldenPath/hg19/encodeDCC/wgEncodeAwgTfbsUniform/wgEncodeAwgTfbsHaibHepg2NrsfPcr2xUniPk.narrowPeak.gz
HepG2	REST	HudsonAlpha	http://hgdownload.cse.ucsc.edu/goldenPath/hg19/encodeDCC/wgEncodeAwgTfbsUniform/wgEncodeAwgTfbsHaibHepg2NrsfV0416101UniPk.narrowPeak.gz
HepG2	RFX5	Stanford	http://hgdownload.cse.ucsc.edu/goldenPath/hg19/encodeDCC/wgEncodeAwgTfbsUniform/wgEncodeAwgTfbsSydhHepg2Rfx5200401194IggrabUniPk.narrowPeak.gz
HepG2	RXRA	HudsonAlpha	http://hgdownload.cse.ucsc.edu/goldenPath/hg19/encodeDCC/wgEncodeAwgTfbsUniform/wgEncodeAwgTfbsHaibHepg2RxraPcr1xUniPk.narrowPeak.gz
HepG2	SIN3AK20	HudsonAlpha	http://hgdownload.cse.ucsc.edu/goldenPath/hg19/encodeDCC/wgEncodeAwgTfbsUniform/wgEncodeAwgTfbsHaibHepg2Sin3ak20Pcr1xUniPk.narrowPeak.gz
HepG2	SMC3	Stanford	http://hgdownload.cse.ucsc.edu/goldenPath/hg19/encodeDCC/wgEncodeAwgTfbsUniform/wgEncodeAwgTfbsSydhHepg2Smc3ab9263IggrabUniPk.narrowPeak.gz
HepG2	SP1	HudsonAlpha	http://hgdownload.cse.ucsc.edu/goldenPath/hg19/encodeDCC/wgEncodeAwgTfbsUniform/wgEncodeAwgTfbsHaibHepg2Sp1Pcr1xUniPk.narrowPeak.gz
HepG2	SP2	HudsonAlpha	http://hgdownload.cse.ucsc.edu/goldenPath/hg19/encodeDCC/wgEncodeAwgTfbsUniform/wgEncodeAwgTfbsHaibHepg2Sp2V0422111UniPk.narrowPeak.gz
HepG2	SREBP1	Stanford	http://hgdownload.cse.ucsc.edu/goldenPath/hg19/encodeDCC/wgEncodeAwgTfbsUniform/wgEncodeAwgTfbsSydhHepg2Srebp1InslnUniPk.narrowPeak.gz
HepG2	SRF	HudsonAlpha	http://hgdownload.cse.ucsc.edu/goldenPath/hg19/encodeDCC/wgEncodeAwgTfbsUniform/wgEncodeAwgTfbsHaibHepg2SrfV0416101UniPk.narrowPeak.gz
HepG2	TAF1	HudsonAlpha	http://hgdownload.cse.ucsc.edu/goldenPath/hg19/encodeDCC/wgEncodeAwgTfbsUniform/wgEncodeAwgTfbsHaibHepg2Taf1Pcr2xUniPk.narrowPeak.gz
HepG2	TBP	Stanford	http://hgdownload.cse.ucsc.edu/goldenPath/hg19/encodeDCC/wgEncodeAwgTfbsUniform/wgEncodeAwgTfbsSydhHepg2TbpIggrabUniPk.narrowPeak.gz
HepG2	TCF12	HudsonAlpha	http://hgdownload.cse.ucsc.edu/goldenPath/hg19/encodeDCC/wgEncodeAwgTfbsUniform/wgEncodeAwgTfbsHaibHepg2Tcf12Pcr1xUniPk.narrowPeak.gz
HepG2	TCF7L2	USC	http://hgdownload.cse.ucsc.edu/goldenPath/hg19/encodeDCC/wgEncodeAwgTfbsUniform/wgEncodeAwgTfbsSydhHepg2Tcf7l2UcdUniPk.narrowPeak.gz
HepG2	TEAD4	HudsonAlpha	http://hgdownload.cse.ucsc.edu/goldenPath/hg19/encodeDCC/wgEncodeAwgTfbsUniform/wgEncodeAwgTfbsHaibHepg2Tead4sc101184V0422111UniPk.narrowPeak.gz
HepG2	USF1	HudsonAlpha	http://hgdownload.cse.ucsc.edu/goldenPath/hg19/encodeDCC/wgEncodeAwgTfbsUniform/wgEncodeAwgTfbsHaibHepg2Usf1Pcr1xUniPk.narrowPeak.gz
HepG2	USF2	Stanford	http://hgdownload.cse.ucsc.edu/goldenPath/hg19/encodeDCC/wgEncodeAwgTfbsUniform/wgEncodeAwgTfbsSydhHepg2Usf2IggrabUniPk.narrowPeak.gz
HepG2	YY1	HudsonAlpha	http://hgdownload.cse.ucsc.edu/goldenPath/hg19/encodeDCC/wgEncodeAwgTfbsUniform/wgEncodeAwgTfbsHaibHepg2Yy1sc281V0416101UniPk.narrowPeak.gz
HepG2	ZBTB33	HudsonAlpha	http://hgdownload.cse.ucsc.edu/goldenPath/hg19/encodeDCC/wgEncodeAwgTfbsUniform/wgEncodeAwgTfbsHaibHepg2Zbtb33Pcr1xUniPk.narrowPeak.gz
HepG2	ZBTB7A	HudsonAlpha	http://hgdownload.cse.ucsc.edu/goldenPath/hg19/encodeDCC/wgEncodeAwgTfbsUniform/wgEncodeAwgTfbsHaibHepg2Zbtb7aV0416101UniPk.narrowPeak.gz
HepG2	ZNF274	USC	http://hgdownload.cse.ucsc.edu/goldenPath/hg19/encodeDCC/wgEncodeAwgTfbsUniform/wgEncodeAwgTfbsSydhHepg2Znf274UcdUniPk.narrowPeak.gz
HFF	CTCF	UW	http://hgdownload.cse.ucsc.edu/goldenPath/hg19/encodeDCC/wgEncodeAwgTfbsUniform/wgEncodeAwgTfbsUwHffCtcfUniPk.narrowPeak.gz
HFF-Myc	CTCF	UW	http://hgdownload.cse.ucsc.edu/goldenPath/hg19/encodeDCC/wgEncodeAwgTfbsUniform/wgEncodeAwgTfbsUwHffmycCtcfUniPk.narrowPeak.gz
HL-60	CTCF	UW	http://hgdownload.cse.ucsc.edu/goldenPath/hg19/encodeDCC/wgEncodeAwgTfbsUniform/wgEncodeAwgTfbsUwHl60CtcfUniPk.narrowPeak.gz
HMEC	CTCF	Broad	http://hgdownload.cse.ucsc.edu/goldenPath/hg19/encodeDCC/wgEncodeAwgTfbsUniform/wgEncodeAwgTfbsBroadHmecCtcfUniPk.narrowPeak.gz
HMEC	CTCF	UW	http://hgdownload.cse.ucsc.edu/goldenPath/hg19/encodeDCC/wgEncodeAwgTfbsUniform/wgEncodeAwgTfbsUwHmecCtcfUniPk.narrowPeak.gz
HMEC	EZH2	Broad	http://hgdownload.cse.ucsc.edu/goldenPath/hg19/encodeDCC/wgEncodeAwgTfbsUniform/wgEncodeAwgTfbsBroadHmecEzh239875UniPk.narrowPeak.gz
HMF	CTCF	UW	http://hgdownload.cse.ucsc.edu/goldenPath/hg19/encodeDCC/wgEncodeAwgTfbsUniform/wgEncodeAwgTfbsUwHmfCtcfUniPk.narrowPeak.gz
HPAF	CTCF	UW	http://hgdownload.cse.ucsc.edu/goldenPath/hg19/encodeDCC/wgEncodeAwgTfbsUniform/wgEncodeAwgTfbsUwHpafCtcfUniPk.narrowPeak.gz
HPF	CTCF	UW	http://hgdownload.cse.ucsc.edu/goldenPath/hg19/encodeDCC/wgEncodeAwgTfbsUniform/wgEncodeAwgTfbsUwHpfCtcfUniPk.narrowPeak.gz
HRE	CTCF	UW	http://hgdownload.cse.ucsc.edu/goldenPath/hg19/encodeDCC/wgEncodeAwgTfbsUniform/wgEncodeAwgTfbsUwHreCtcfUniPk.narrowPeak.gz
HRPEpiC	CTCF	UW	http://hgdownload.cse.ucsc.edu/goldenPath/hg19/encodeDCC/wgEncodeAwgTfbsUniform/wgEncodeAwgTfbsUwHrpeCtcfUniPk.narrowPeak.gz
HSMM	CTCF	Broad	http://hgdownload.cse.ucsc.edu/goldenPath/hg19/encodeDCC/wgEncodeAwgTfbsUniform/wgEncodeAwgTfbsBroadHsmmCtcfUniPk.narrowPeak.gz
HSMM	EZH2	Broad	http://hgdownload.cse.ucsc.edu/goldenPath/hg19/encodeDCC/wgEncodeAwgTfbsUniform/wgEncodeAwgTfbsBroadHsmmEzh239875UniPk.narrowPeak.gz
HSMMtube	CTCF	Broad	http://hgdownload.cse.ucsc.edu/goldenPath/hg19/encodeDCC/wgEncodeAwgTfbsUniform/wgEncodeAwgTfbsBroadHsmmtCtcfUniPk.narrowPeak.gz
HSMMtube	EZH2	Broad	http://hgdownload.cse.ucsc.edu/goldenPath/hg19/encodeDCC/wgEncodeAwgTfbsUniform/wgEncodeAwgTfbsBroadHsmmtEzh239875UniPk.narrowPeak.gz
HUVEC	CTCF	Broad	http://hgdownload.cse.ucsc.edu/goldenPath/hg19/encodeDCC/wgEncodeAwgTfbsUniform/wgEncodeAwgTfbsBroadHuvecCtcfUniPk.narrowPeak.gz
HUVEC	CTCF	UT-A	http://hgdownload.cse.ucsc.edu/goldenPath/hg19/encodeDCC/wgEncodeAwgTfbsUniform/wgEncodeAwgTfbsUtaHuvecCtcfUniPk.narrowPeak.gz
HUVEC	CTCF	UW	http://hgdownload.cse.ucsc.edu/goldenPath/hg19/encodeDCC/wgEncodeAwgTfbsUniform/wgEncodeAwgTfbsUwHuvecCtcfUniPk.narrowPeak.gz
HUVEC	EZH2	Broad	http://hgdownload.cse.ucsc.edu/goldenPath/hg19/encodeDCC/wgEncodeAwgTfbsUniform/wgEncodeAwgTfbsBroadHuvecEzh239875UniPk.narrowPeak.gz
HUVEC	FOS	USC	http://hgdownload.cse.ucsc.edu/goldenPath/hg19/encodeDCC/wgEncodeAwgTfbsUniform/wgEncodeAwgTfbsSydhHuvecCfosUcdUniPk.narrowPeak.gz
HUVEC	GATA2	USC	http://hgdownload.cse.ucsc.edu/goldenPath/hg19/encodeDCC/wgEncodeAwgTfbsUniform/wgEncodeAwgTfbsSydhHuvecGata2UcdUniPk.narrowPeak.gz
HUVEC	JUN	Stanford	http://hgdownload.cse.ucsc.edu/goldenPath/hg19/encodeDCC/wgEncodeAwgTfbsUniform/wgEncodeAwgTfbsSydhHuvecCjunUniPk.narrowPeak.gz
HUVEC	MAX	Stanford	http://hgdownload.cse.ucsc.edu/goldenPath/hg19/encodeDCC/wgEncodeAwgTfbsUniform/wgEncodeAwgTfbsSydhHuvecMaxUniPk.narrowPeak.gz
HUVEC	MYC	UT-A	http://hgdownload.cse.ucsc.edu/goldenPath/hg19/encodeDCC/wgEncodeAwgTfbsUniform/wgEncodeAwgTfbsUtaHuvecCmycUniPk.narrowPeak.gz
HUVEC	POLR2A	Broad	http://hgdownload.cse.ucsc.edu/goldenPath/hg19/encodeDCC/wgEncodeAwgTfbsUniform/wgEncodeAwgTfbsBroadHuvecPol2bUniPk.narrowPeak.gz
HUVEC	POLR2A	HudsonAlpha	http://hgdownload.cse.ucsc.edu/goldenPath/hg19/encodeDCC/wgEncodeAwgTfbsUniform/wgEncodeAwgTfbsHaibHuvecPol24h8V0416101UniPk.narrowPeak.gz
HUVEC	POLR2A	HudsonAlpha	http://hgdownload.cse.ucsc.edu/goldenPath/hg19/encodeDCC/wgEncodeAwgTfbsUniform/wgEncodeAwgTfbsHaibHuvecPol2Pcr1xUniPk.narrowPeak.gz
HUVEC	POLR2A	Stanford	http://hgdownload.cse.ucsc.edu/goldenPath/hg19/encodeDCC/wgEncodeAwgTfbsUniform/wgEncodeAwgTfbsSydhHuvecPol2UniPk.narrowPeak.gz
HUVEC	POLR2A	UT-A	http://hgdownload.cse.ucsc.edu/goldenPath/hg19/encodeDCC/wgEncodeAwgTfbsUniform/wgEncodeAwgTfbsUtaHuvecPol2UniPk.narrowPeak.gz
HVMF	CTCF	UW	http://hgdownload.cse.ucsc.edu/goldenPath/hg19/encodeDCC/wgEncodeAwgTfbsUniform/wgEncodeAwgTfbsUwHvmfCtcfUniPk.narrowPeak.gz
IMR90	CEBPB	Stanford	http://hgdownload.cse.ucsc.edu/goldenPath/hg19/encodeDCC/wgEncodeAwgTfbsUniform/wgEncodeAwgTfbsSydhImr90CebpbIggrabUniPk.narrowPeak.gz
IMR90	CTCF	Stanford	http://hgdownload.cse.ucsc.edu/goldenPath/hg19/encodeDCC/wgEncodeAwgTfbsUniform/wgEncodeAwgTfbsSydhImr90CtcfbIggrabUniPk.narrowPeak.gz
IMR90	MAFK	Stanford	http://hgdownload.cse.ucsc.edu/goldenPath/hg19/encodeDCC/wgEncodeAwgTfbsUniform/wgEncodeAwgTfbsSydhImr90MafkIggrabUniPk.narrowPeak.gz
IMR90	POLR2A	Stanford	http://hgdownload.cse.ucsc.edu/goldenPath/hg19/encodeDCC/wgEncodeAwgTfbsUniform/wgEncodeAwgTfbsSydhImr90Pol2IggrabUniPk.narrowPeak.gz
IMR90	RAD21	Stanford	http://hgdownload.cse.ucsc.edu/goldenPath/hg19/encodeDCC/wgEncodeAwgTfbsUniform/wgEncodeAwgTfbsSydhImr90Rad21IggrabUniPk.narrowPeak.gz
K562	ARID3A	Stanford	http://hgdownload.cse.ucsc.edu/goldenPath/hg19/encodeDCC/wgEncodeAwgTfbsUniform/wgEncodeAwgTfbsSydhK562Arid3asc8821IggrabUniPk.narrowPeak.gz
K562	ATF1	Harvard	http://hgdownload.cse.ucsc.edu/goldenPath/hg19/encodeDCC/wgEncodeAwgTfbsUniform/wgEncodeAwgTfbsSydhK562Atf106325UniPk.narrowPeak.gz
K562	ATF3	Harvard	http://hgdownload.cse.ucsc.edu/goldenPath/hg19/encodeDCC/wgEncodeAwgTfbsUniform/wgEncodeAwgTfbsSydhK562Atf3UniPk.narrowPeak.gz
K562	ATF3	HudsonAlpha	http://hgdownload.cse.ucsc.edu/goldenPath/hg19/encodeDCC/wgEncodeAwgTfbsUniform/wgEncodeAwgTfbsHaibK562Atf3V0416101UniPk.narrowPeak.gz
K562	BACH1	Stanford	http://hgdownload.cse.ucsc.edu/goldenPath/hg19/encodeDCC/wgEncodeAwgTfbsUniform/wgEncodeAwgTfbsSydhK562Bach1sc14700IggrabUniPk.narrowPeak.gz
K562	BCL3	HudsonAlpha	http://hgdownload.cse.ucsc.edu/goldenPath/hg19/encodeDCC/wgEncodeAwgTfbsUniform/wgEncodeAwgTfbsHaibK562Bcl3Pcr1xUniPk.narrowPeak.gz
K562	BCLAF1	HudsonAlpha	http://hgdownload.cse.ucsc.edu/goldenPath/hg19/encodeDCC/wgEncodeAwgTfbsUniform/wgEncodeAwgTfbsHaibK562Bclaf101388Pcr1xUniPk.narrowPeak.gz
K562	BDP1	Harvard	http://hgdownload.cse.ucsc.edu/goldenPath/hg19/encodeDCC/wgEncodeAwgTfbsUniform/wgEncodeAwgTfbsSydhK562Bdp1UniPk.narrowPeak.gz
K562	BHLHE40	Stanford	http://hgdownload.cse.ucsc.edu/goldenPath/hg19/encodeDCC/wgEncodeAwgTfbsUniform/wgEncodeAwgTfbsSydhK562Bhlhe40nb100IggrabUniPk.narrowPeak.gz
K562	BRF1	Harvard	http://hgdownload.cse.ucsc.edu/goldenPath/hg19/encodeDCC/wgEncodeAwgTfbsUniform/wgEncodeAwgTfbsSydhK562Brf1UniPk.narrowPeak.gz
K562	BRF2	Harvard	http://hgdownload.cse.ucsc.edu/goldenPath/hg19/encodeDCC/wgEncodeAwgTfbsUniform/wgEncodeAwgTfbsSydhK562Brf2UniPk.narrowPeak.gz
K562	CBX3	HudsonAlpha	http://hgdownload.cse.ucsc.edu/goldenPath/hg19/encodeDCC/wgEncodeAwgTfbsUniform/wgEncodeAwgTfbsHaibK562Cbx3sc101004V0422111UniPk.narrowPeak.gz
K562	CCNT2	Harvard	http://hgdownload.cse.ucsc.edu/goldenPath/hg19/encodeDCC/wgEncodeAwgTfbsUniform/wgEncodeAwgTfbsSydhK562Ccnt2UniPk.narrowPeak.gz
K562	CEBPB	HudsonAlpha	http://hgdownload.cse.ucsc.edu/goldenPath/hg19/encodeDCC/wgEncodeAwgTfbsUniform/wgEncodeAwgTfbsHaibK562Cebpbsc150V0422111UniPk.narrowPeak.gz
K562	CEBPB	Stanford	http://hgdownload.cse.ucsc.edu/goldenPath/hg19/encodeDCC/wgEncodeAwgTfbsUniform/wgEncodeAwgTfbsSydhK562CebpbIggrabUniPk.narrowPeak.gz
K562	CHD1	Broad	http://hgdownload.cse.ucsc.edu/goldenPath/hg19/encodeDCC/wgEncodeAwgTfbsUniform/wgEncodeAwgTfbsBroadK562Chd1a301218aUniPk.narrowPeak.gz
K562	CHD2	Stanford	http://hgdownload.cse.ucsc.edu/goldenPath/hg19/encodeDCC/wgEncodeAwgTfbsUniform/wgEncodeAwgTfbsSydhK562Chd2ab68301IggrabUniPk.narrowPeak.gz
K562	CTCF	Broad	http://hgdownload.cse.ucsc.edu/goldenPath/hg19/encodeDCC/wgEncodeAwgTfbsUniform/wgEncodeAwgTfbsBroadK562CtcfUniPk.narrowPeak.gz
K562	CTCF	HudsonAlpha	http://hgdownload.cse.ucsc.edu/goldenPath/hg19/encodeDCC/wgEncodeAwgTfbsUniform/wgEncodeAwgTfbsHaibK562CtcfcPcr1xUniPk.narrowPeak.gz
K562	CTCF	Stanford	http://hgdownload.cse.ucsc.edu/goldenPath/hg19/encodeDCC/wgEncodeAwgTfbsUniform/wgEncodeAwgTfbsSydhK562CtcfbIggrabUniPk.narrowPeak.gz
K562	CTCF	UT-A	http://hgdownload.cse.ucsc.edu/goldenPath/hg19/encodeDCC/wgEncodeAwgTfbsUniform/wgEncodeAwgTfbsUtaK562CtcfUniPk.narrowPeak.gz
K562	CTCF	UW	http://hgdownload.cse.ucsc.edu/goldenPath/hg19/encodeDCC/wgEncodeAwgTfbsUniform/wgEncodeAwgTfbsUwK562CtcfUniPk.narrowPeak.gz
K562	CTCFL	HudsonAlpha	http://hgdownload.cse.ucsc.edu/goldenPath/hg19/encodeDCC/wgEncodeAwgTfbsUniform/wgEncodeAwgTfbsHaibK562Ctcflsc98982V0416101UniPk.narrowPeak.gz
K562	E2F4	USC	http://hgdownload.cse.ucsc.edu/goldenPath/hg19/encodeDCC/wgEncodeAwgTfbsUniform/wgEncodeAwgTfbsSydhK562E2f4UcdUniPk.narrowPeak.gz
K562	E2F6	HudsonAlpha	http://hgdownload.cse.ucsc.edu/goldenPath/hg19/encodeDCC/wgEncodeAwgTfbsUniform/wgEncodeAwgTfbsHaibK562E2f6V0416102UniPk.narrowPeak.gz
K562	E2F6	USC	http://hgdownload.cse.ucsc.edu/goldenPath/hg19/encodeDCC/wgEncodeAwgTfbsUniform/wgEncodeAwgTfbsSydhK562E2f6UcdUniPk.narrowPeak.gz
K562	EGR1	HudsonAlpha	http://hgdownload.cse.ucsc.edu/goldenPath/hg19/encodeDCC/wgEncodeAwgTfbsUniform/wgEncodeAwgTfbsHaibK562Egr1V0416101UniPk.narrowPeak.gz
K562	ELF1	HudsonAlpha	http://hgdownload.cse.ucsc.edu/goldenPath/hg19/encodeDCC/wgEncodeAwgTfbsUniform/wgEncodeAwgTfbsHaibK562Elf1sc631V0416102UniPk.narrowPeak.gz
K562	ELK1	Stanford	http://hgdownload.cse.ucsc.edu/goldenPath/hg19/encodeDCC/wgEncodeAwgTfbsUniform/wgEncodeAwgTfbsSydhK562Elk112771IggrabUniPk.narrowPeak.gz
K562	EP300	Broad	http://hgdownload.cse.ucsc.edu/goldenPath/hg19/encodeDCC/wgEncodeAwgTfbsUniform/wgEncodeAwgTfbsBroadK562P300UniPk.narrowPeak.gz
K562	EP300	Stanford	http://hgdownload.cse.ucsc.edu/goldenPath/hg19/encodeDCC/wgEncodeAwgTfbsUniform/wgEncodeAwgTfbsSydhK562P300IggrabUniPk.narrowPeak.gz
K562	ETS1	HudsonAlpha	http://hgdownload.cse.ucsc.edu/goldenPath/hg19/encodeDCC/wgEncodeAwgTfbsUniform/wgEncodeAwgTfbsHaibK562Ets1V0416101UniPk.narrowPeak.gz
K562	EZH2	Broad	http://hgdownload.cse.ucsc.edu/goldenPath/hg19/encodeDCC/wgEncodeAwgTfbsUniform/wgEncodeAwgTfbsBroadK562Ezh239875UniPk.narrowPeak.gz
K562	FOS	UChicago	http://hgdownload.cse.ucsc.edu/goldenPath/hg19/encodeDCC/wgEncodeAwgTfbsUniform/wgEncodeAwgTfbsUchicagoK562EfosUniPk.narrowPeak.gz
K562	FOS	Yale	http://hgdownload.cse.ucsc.edu/goldenPath/hg19/encodeDCC/wgEncodeAwgTfbsUniform/wgEncodeAwgTfbsSydhK562CfosUniPk.narrowPeak.gz
K562	FOSL1	HudsonAlpha	http://hgdownload.cse.ucsc.edu/goldenPath/hg19/encodeDCC/wgEncodeAwgTfbsUniform/wgEncodeAwgTfbsHaibK562Fosl1sc183V0416101UniPk.narrowPeak.gz
K562	GABPA	HudsonAlpha	http://hgdownload.cse.ucsc.edu/goldenPath/hg19/encodeDCC/wgEncodeAwgTfbsUniform/wgEncodeAwgTfbsHaibK562GabpV0416101UniPk.narrowPeak.gz
K562	GATA1	USC	http://hgdownload.cse.ucsc.edu/goldenPath/hg19/encodeDCC/wgEncodeAwgTfbsUniform/wgEncodeAwgTfbsSydhK562Gata1UcdUniPk.narrowPeak.gz
K562	GATA2	HudsonAlpha	http://hgdownload.cse.ucsc.edu/goldenPath/hg19/encodeDCC/wgEncodeAwgTfbsUniform/wgEncodeAwgTfbsHaibK562Gata2sc267Pcr1xUniPk.narrowPeak.gz
K562	GATA2	UChicago	http://hgdownload.cse.ucsc.edu/goldenPath/hg19/encodeDCC/wgEncodeAwgTfbsUniform/wgEncodeAwgTfbsUchicagoK562Egata2UniPk.narrowPeak.gz
K562	GATA2	USC	http://hgdownload.cse.ucsc.edu/goldenPath/hg19/encodeDCC/wgEncodeAwgTfbsUniform/wgEncodeAwgTfbsSydhK562Gata2UcdUniPk.narrowPeak.gz
K562	GTF2B	Harvard	http://hgdownload.cse.ucsc.edu/goldenPath/hg19/encodeDCC/wgEncodeAwgTfbsUniform/wgEncodeAwgTfbsSydhK562Gtf2bUniPk.narrowPeak.gz
K562	GTF2F1	Stanford	http://hgdownload.cse.ucsc.edu/goldenPath/hg19/encodeDCC/wgEncodeAwgTfbsUniform/wgEncodeAwgTfbsSydhK562Gtf2f1ab28179IggrabUniPk.narrowPeak.gz
K562	GTF3C2	Harvard	http://hgdownload.cse.ucsc.edu/goldenPath/hg19/encodeDCC/wgEncodeAwgTfbsUniform/wgEncodeAwgTfbsSydhK562Tf3c110UniPk.narrowPeak.gz
K562	HDAC1	Broad	http://hgdownload.cse.ucsc.edu/goldenPath/hg19/encodeDCC/wgEncodeAwgTfbsUniform/wgEncodeAwgTfbsBroadK562Hdac1sc6298UniPk.narrowPeak.gz
K562	HDAC2	Broad	http://hgdownload.cse.ucsc.edu/goldenPath/hg19/encodeDCC/wgEncodeAwgTfbsUniform/wgEncodeAwgTfbsBroadK562Hdac2a300705aUniPk.narrowPeak.gz
K562	HDAC2	HudsonAlpha	http://hgdownload.cse.ucsc.edu/goldenPath/hg19/encodeDCC/wgEncodeAwgTfbsUniform/wgEncodeAwgTfbsHaibK562Hdac2sc6296V0416102UniPk.narrowPeak.gz
K562	HDAC6	Broad	http://hgdownload.cse.ucsc.edu/goldenPath/hg19/encodeDCC/wgEncodeAwgTfbsUniform/wgEncodeAwgTfbsBroadK562Hdac6a301341aUniPk.narrowPeak.gz
K562	HDAC8	UChicago	http://hgdownload.cse.ucsc.edu/goldenPath/hg19/encodeDCC/wgEncodeAwgTfbsUniform/wgEncodeAwgTfbsUchicagoK562Ehdac8UniPk.narrowPeak.gz
K562	HMGN3	Harvard	http://hgdownload.cse.ucsc.edu/goldenPath/hg19/encodeDCC/wgEncodeAwgTfbsUniform/wgEncodeAwgTfbsSydhK562Hmgn3UniPk.narrowPeak.gz
K562	IRF1	Stanford	http://hgdownload.cse.ucsc.edu/goldenPath/hg19/encodeDCC/wgEncodeAwgTfbsUniform/wgEncodeAwgTfbsSydhK562Irf1Ifna30UniPk.narrowPeak.gz
K562	IRF1	Stanford	http://hgdownload.cse.ucsc.edu/goldenPath/hg19/encodeDCC/wgEncodeAwgTfbsUniform/wgEncodeAwgTfbsSydhK562Irf1Ifna6hUniPk.narrowPeak.gz
K562	IRF1	Stanford	http://hgdownload.cse.ucsc.edu/goldenPath/hg19/encodeDCC/wgEncodeAwgTfbsUniform/wgEncodeAwgTfbsSydhK562Irf1Ifng30UniPk.narrowPeak.gz
K562	IRF1	Stanford	http://hgdownload.cse.ucsc.edu/goldenPath/hg19/encodeDCC/wgEncodeAwgTfbsUniform/wgEncodeAwgTfbsSydhK562Irf1Ifng6hUniPk.narrowPeak.gz
K562	JUN	Stanford	http://hgdownload.cse.ucsc.edu/goldenPath/hg19/encodeDCC/wgEncodeAwgTfbsUniform/wgEncodeAwgTfbsSydhK562CjunIfna30UniPk.narrowPeak.gz
K562	JUN	Yale	http://hgdownload.cse.ucsc.edu/goldenPath/hg19/encodeDCC/wgEncodeAwgTfbsUniform/wgEncodeAwgTfbsSydhK562CjunUniPk.narrowPeak.gz
K562	JUN	Yale	http://hgdownload.cse.ucsc.edu/goldenPath/hg19/encodeDCC/wgEncodeAwgTfbsUniform/wgEncodeAwgTfbsSydhK562CjunIfna6hUniPk.narrowPeak.gz
K562	JUN	Yale	http://hgdownload.cse.ucsc.edu/goldenPath/hg19/encodeDCC/wgEncodeAwgTfbsUniform/wgEncodeAwgTfbsSydhK562CjunIfng30UniPk.narrowPeak.gz
K562	JUN	Yale	http://hgdownload.cse.ucsc.edu/goldenPath/hg19/encodeDCC/wgEncodeAwgTfbsUniform/wgEncodeAwgTfbsSydhK562CjunIfng6hUniPk.narrowPeak.gz
K562	JUNB	UChicago	http://hgdownload.cse.ucsc.edu/goldenPath/hg19/encodeDCC/wgEncodeAwgTfbsUniform/wgEncodeAwgTfbsUchicagoK562EjunbUniPk.narrowPeak.gz
K562	JUND	Stanford	http://hgdownload.cse.ucsc.edu/goldenPath/hg19/encodeDCC/wgEncodeAwgTfbsUniform/wgEncodeAwgTfbsSydhK562JundIggrabUniPk.narrowPeak.gz
K562	JUND	UChicago	http://hgdownload.cse.ucsc.edu/goldenPath/hg19/encodeDCC/wgEncodeAwgTfbsUniform/wgEncodeAwgTfbsUchicagoK562EjundUniPk.narrowPeak.gz
K562	KAP1	USC	http://hgdownload.cse.ucsc.edu/goldenPath/hg19/encodeDCC/wgEncodeAwgTfbsUniform/wgEncodeAwgTfbsSydhK562Kap1UcdUniPk.narrowPeak.gz
K562	KDM5B	Broad	http://hgdownload.cse.ucsc.edu/goldenPath/hg19/encodeDCC/wgEncodeAwgTfbsUniform/wgEncodeAwgTfbsBroadK562Plu1UniPk.narrowPeak.gz
K562	MAFF	Stanford	http://hgdownload.cse.ucsc.edu/goldenPath/hg19/encodeDCC/wgEncodeAwgTfbsUniform/wgEncodeAwgTfbsSydhK562MaffIggrabUniPk.narrowPeak.gz
K562	MAFK	Stanford	http://hgdownload.cse.ucsc.edu/goldenPath/hg19/encodeDCC/wgEncodeAwgTfbsUniform/wgEncodeAwgTfbsSydhK562Mafkab50322IggrabUniPk.narrowPeak.gz
K562	MAX	HudsonAlpha	http://hgdownload.cse.ucsc.edu/goldenPath/hg19/encodeDCC/wgEncodeAwgTfbsUniform/wgEncodeAwgTfbsHaibK562MaxV0416102UniPk.narrowPeak.gz
K562	MAX	Stanford	http://hgdownload.cse.ucsc.edu/goldenPath/hg19/encodeDCC/wgEncodeAwgTfbsUniform/wgEncodeAwgTfbsSydhK562MaxIggrabUniPk.narrowPeak.gz
K562	MAZ	Stanford	http://hgdownload.cse.ucsc.edu/goldenPath/hg19/encodeDCC/wgEncodeAwgTfbsUniform/wgEncodeAwgTfbsSydhK562Mazab85725IggrabUniPk.narrowPeak.gz
K562	MEF2A	HudsonAlpha	http://hgdownload.cse.ucsc.edu/goldenPath/hg19/encodeDCC/wgEncodeAwgTfbsUniform/wgEncodeAwgTfbsHaibK562Mef2aV0416101UniPk.narrowPeak.gz
K562	MXI1	Stanford	http://hgdownload.cse.ucsc.edu/goldenPath/hg19/encodeDCC/wgEncodeAwgTfbsUniform/wgEncodeAwgTfbsSydhK562Mxi1af4185IggrabUniPk.narrowPeak.gz
K562	MYC	Stanford	http://hgdownload.cse.ucsc.edu/goldenPath/hg19/encodeDCC/wgEncodeAwgTfbsUniform/wgEncodeAwgTfbsSydhK562CmycIfng30UniPk.narrowPeak.gz
K562	MYC	Stanford	http://hgdownload.cse.ucsc.edu/goldenPath/hg19/encodeDCC/wgEncodeAwgTfbsUniform/wgEncodeAwgTfbsSydhK562CmycIggrabUniPk.narrowPeak.gz
K562	MYC	UT-A	http://hgdownload.cse.ucsc.edu/goldenPath/hg19/encodeDCC/wgEncodeAwgTfbsUniform/wgEncodeAwgTfbsUtaK562CmycUniPk.narrowPeak.gz
K562	MYC	Yale	http://hgdownload.cse.ucsc.edu/goldenPath/hg19/encodeDCC/wgEncodeAwgTfbsUniform/wgEncodeAwgTfbsSydhK562CmycUniPk.narrowPeak.gz
K562	MYC	Yale	http://hgdownload.cse.ucsc.edu/goldenPath/hg19/encodeDCC/wgEncodeAwgTfbsUniform/wgEncodeAwgTfbsSydhK562CmycIfna30UniPk.narrowPeak.gz
K562	MYC	Yale	http://hgdownload.cse.ucsc.edu/goldenPath/hg19/encodeDCC/wgEncodeAwgTfbsUniform/wgEncodeAwgTfbsSydhK562CmycIfna6hUniPk.narrowPeak.gz
K562	MYC	Yale	http://hgdownload.cse.ucsc.edu/goldenPath/hg19/encodeDCC/wgEncodeAwgTfbsUniform/wgEncodeAwgTfbsSydhK562CmycIfng6hUniPk.narrowPeak.gz
K562	NFE2	Yale	http://hgdownload.cse.ucsc.edu/goldenPath/hg19/encodeDCC/wgEncodeAwgTfbsUniform/wgEncodeAwgTfbsSydhK562Nfe2UniPk.narrowPeak.gz
K562	NFYA	Stanford	http://hgdownload.cse.ucsc.edu/goldenPath/hg19/encodeDCC/wgEncodeAwgTfbsUniform/wgEncodeAwgTfbsSydhK562NfyaUniPk.narrowPeak.gz
K562	NFYB	Stanford	http://hgdownload.cse.ucsc.edu/goldenPath/hg19/encodeDCC/wgEncodeAwgTfbsUniform/wgEncodeAwgTfbsSydhK562NfybUniPk.narrowPeak.gz
K562	NR2C2	USC	http://hgdownload.cse.ucsc.edu/goldenPath/hg19/encodeDCC/wgEncodeAwgTfbsUniform/wgEncodeAwgTfbsSydhK562Tr4UcdUniPk.narrowPeak.gz
K562	NR2F2	HudsonAlpha	http://hgdownload.cse.ucsc.edu/goldenPath/hg19/encodeDCC/wgEncodeAwgTfbsUniform/wgEncodeAwgTfbsHaibK562Nr2f2sc271940V0422111UniPk.narrowPeak.gz
K562	NRF1	Stanford	http://hgdownload.cse.ucsc.edu/goldenPath/hg19/encodeDCC/wgEncodeAwgTfbsUniform/wgEncodeAwgTfbsSydhK562Nrf1IggrabUniPk.narrowPeak.gz
K562	PHF8	Broad	http://hgdownload.cse.ucsc.edu/goldenPath/hg19/encodeDCC/wgEncodeAwgTfbsUniform/wgEncodeAwgTfbsBroadK562Phf8a301772aUniPk.narrowPeak.gz
K562	PML	HudsonAlpha	http://hgdownload.cse.ucsc.edu/goldenPath/hg19/encodeDCC/wgEncodeAwgTfbsUniform/wgEncodeAwgTfbsHaibK562Pmlsc71910V0422111UniPk.narrowPeak.gz
K562	POLR2A	Broad	http://hgdownload.cse.ucsc.edu/goldenPath/hg19/encodeDCC/wgEncodeAwgTfbsUniform/wgEncodeAwgTfbsBroadK562Pol2bUniPk.narrowPeak.gz
K562	POLR2A	HudsonAlpha	http://hgdownload.cse.ucsc.edu/goldenPath/hg19/encodeDCC/wgEncodeAwgTfbsUniform/wgEncodeAwgTfbsHaibK562Pol24h8V0416101UniPk.narrowPeak.gz
K562	POLR2A	HudsonAlpha	http://hgdownload.cse.ucsc.edu/goldenPath/hg19/encodeDCC/wgEncodeAwgTfbsUniform/wgEncodeAwgTfbsHaibK562Pol2V0416101UniPk.narrowPeak.gz
K562	POLR2A	Stanford	http://hgdownload.cse.ucsc.edu/goldenPath/hg19/encodeDCC/wgEncodeAwgTfbsUniform/wgEncodeAwgTfbsSydhK562Pol2Ifng30UniPk.narrowPeak.gz
K562	POLR2A	Stanford	http://hgdownload.cse.ucsc.edu/goldenPath/hg19/encodeDCC/wgEncodeAwgTfbsUniform/wgEncodeAwgTfbsSydhK562Pol2IggmusUniPk.narrowPeak.gz
K562	POLR2A	Stanford	http://hgdownload.cse.ucsc.edu/goldenPath/hg19/encodeDCC/wgEncodeAwgTfbsUniform/wgEncodeAwgTfbsSydhK562Pol2s2UniPk.narrowPeak.gz
K562	POLR2A	Stanford	http://hgdownload.cse.ucsc.edu/goldenPath/hg19/encodeDCC/wgEncodeAwgTfbsUniform/wgEncodeAwgTfbsSydhK562Pol2s2IggrabUniPk.narrowPeak.gz
K562	POLR2A	UT-A	http://hgdownload.cse.ucsc.edu/goldenPath/hg19/encodeDCC/wgEncodeAwgTfbsUniform/wgEncodeAwgTfbsUtaK562Pol2UniPk.narrowPeak.gz
K562	POLR2A	Yale	http://hgdownload.cse.ucsc.edu/goldenPath/hg19/encodeDCC/wgEncodeAwgTfbsUniform/wgEncodeAwgTfbsSydhK562Pol2UniPk.narrowPeak.gz
K562	POLR2A	Yale	http://hgdownload.cse.ucsc.edu/goldenPath/hg19/encodeDCC/wgEncodeAwgTfbsUniform/wgEncodeAwgTfbsSydhK562Pol2Ifna30UniPk.narrowPeak.gz
K562	POLR2A	Yale	http://hgdownload.cse.ucsc.edu/goldenPath/hg19/encodeDCC/wgEncodeAwgTfbsUniform/wgEncodeAwgTfbsSydhK562Pol2Ifna6hUniPk.narrowPeak.gz
K562	POLR2A	Yale	http://hgdownload.cse.ucsc.edu/goldenPath/hg19/encodeDCC/wgEncodeAwgTfbsUniform/wgEncodeAwgTfbsSydhK562Pol2Ifng6hUniPk.narrowPeak.gz
K562	POLR3G	Stanford	http://hgdownload.cse.ucsc.edu/goldenPath/hg19/encodeDCC/wgEncodeAwgTfbsUniform/wgEncodeAwgTfbsSydhK562Pol3UniPk.narrowPeak.gz
K562	RAD21	HudsonAlpha	http://hgdownload.cse.ucsc.edu/goldenPath/hg19/encodeDCC/wgEncodeAwgTfbsUniform/wgEncodeAwgTfbsHaibK562Rad21V0416102UniPk.narrowPeak.gz
K562	RAD21	Yale	http://hgdownload.cse.ucsc.edu/goldenPath/hg19/encodeDCC/wgEncodeAwgTfbsUniform/wgEncodeAwgTfbsSydhK562Rad21UniPk.narrowPeak.gz
K562	RBBP5	Broad	http://hgdownload.cse.ucsc.edu/goldenPath/hg19/encodeDCC/wgEncodeAwgTfbsUniform/wgEncodeAwgTfbsBroadK562Rbbp5a300109aUniPk.narrowPeak.gz
K562	RCOR1	Stanford	http://hgdownload.cse.ucsc.edu/goldenPath/hg19/encodeDCC/wgEncodeAwgTfbsUniform/wgEncodeAwgTfbsSydhK562Corestab24166IggrabUniPk.narrowPeak.gz
K562	RCOR1	Stanford	http://hgdownload.cse.ucsc.edu/goldenPath/hg19/encodeDCC/wgEncodeAwgTfbsUniform/wgEncodeAwgTfbsSydhK562Corestsc30189IggrabUniPk.narrowPeak.gz
K562	RDBP	Harvard	http://hgdownload.cse.ucsc.edu/goldenPath/hg19/encodeDCC/wgEncodeAwgTfbsUniform/wgEncodeAwgTfbsSydhK562NelfeUniPk.narrowPeak.gz
K562	REST	HudsonAlpha	http://hgdownload.cse.ucsc.edu/goldenPath/hg19/encodeDCC/wgEncodeAwgTfbsUniform/wgEncodeAwgTfbsHaibK562NrsfV0416102UniPk.narrowPeak.gz
K562	RFX5	Stanford	http://hgdownload.cse.ucsc.edu/goldenPath/hg19/encodeDCC/wgEncodeAwgTfbsUniform/wgEncodeAwgTfbsSydhK562Rfx5IggrabUniPk.narrowPeak.gz
K562	RPC155	Harvard	http://hgdownload.cse.ucsc.edu/goldenPath/hg19/encodeDCC/wgEncodeAwgTfbsUniform/wgEncodeAwgTfbsSydhK562Rpc155UniPk.narrowPeak.gz
K562	SAP30	Broad	http://hgdownload.cse.ucsc.edu/goldenPath/hg19/encodeDCC/wgEncodeAwgTfbsUniform/wgEncodeAwgTfbsBroadK562Sap3039731UniPk.narrowPeak.gz
K562	SETDB1	USC	http://hgdownload.cse.ucsc.edu/goldenPath/hg19/encodeDCC/wgEncodeAwgTfbsUniform/wgEncodeAwgTfbsSydhK562Setdb1MnasedUcdUniPk.narrowPeak.gz
K562	SETDB1	USC	http://hgdownload.cse.ucsc.edu/goldenPath/hg19/encodeDCC/wgEncodeAwgTfbsUniform/wgEncodeAwgTfbsSydhK562Setdb1UcdUniPk.narrowPeak.gz
K562	SIN3AK20	HudsonAlpha	http://hgdownload.cse.ucsc.edu/goldenPath/hg19/encodeDCC/wgEncodeAwgTfbsUniform/wgEncodeAwgTfbsHaibK562Sin3ak20V0416101UniPk.narrowPeak.gz
K562	SIRT6	Harvard	http://hgdownload.cse.ucsc.edu/goldenPath/hg19/encodeDCC/wgEncodeAwgTfbsUniform/wgEncodeAwgTfbsSydhK562Sirt6UniPk.narrowPeak.gz
K562	SIX5	HudsonAlpha	http://hgdownload.cse.ucsc.edu/goldenPath/hg19/encodeDCC/wgEncodeAwgTfbsUniform/wgEncodeAwgTfbsHaibK562Six5Pcr1xUniPk.narrowPeak.gz
K562	SMARCA4	Stanford	http://hgdownload.cse.ucsc.edu/goldenPath/hg19/encodeDCC/wgEncodeAwgTfbsUniform/wgEncodeAwgTfbsSydhK562Brg1IggmusUniPk.narrowPeak.gz
K562	SMARCB1	Stanford	http://hgdownload.cse.ucsc.edu/goldenPath/hg19/encodeDCC/wgEncodeAwgTfbsUniform/wgEncodeAwgTfbsSydhK562Ini1IggmusUniPk.narrowPeak.gz
K562	SMC3	Stanford	http://hgdownload.cse.ucsc.edu/goldenPath/hg19/encodeDCC/wgEncodeAwgTfbsUniform/wgEncodeAwgTfbsSydhK562Smc3ab9263IggrabUniPk.narrowPeak.gz
K562	SP1	HudsonAlpha	http://hgdownload.cse.ucsc.edu/goldenPath/hg19/encodeDCC/wgEncodeAwgTfbsUniform/wgEncodeAwgTfbsHaibK562Sp1Pcr1xUniPk.narrowPeak.gz
K562	SP2	HudsonAlpha	http://hgdownload.cse.ucsc.edu/goldenPath/hg19/encodeDCC/wgEncodeAwgTfbsUniform/wgEncodeAwgTfbsHaibK562Sp2sc643V0416102UniPk.narrowPeak.gz
K562	SPI1	HudsonAlpha	http://hgdownload.cse.ucsc.edu/goldenPath/hg19/encodeDCC/wgEncodeAwgTfbsUniform/wgEncodeAwgTfbsHaibK562Pu1Pcr1xUniPk.narrowPeak.gz
K562	SRF	HudsonAlpha	http://hgdownload.cse.ucsc.edu/goldenPath/hg19/encodeDCC/wgEncodeAwgTfbsUniform/wgEncodeAwgTfbsHaibK562SrfV0416101UniPk.narrowPeak.gz
K562	STAT1	Stanford	http://hgdownload.cse.ucsc.edu/goldenPath/hg19/encodeDCC/wgEncodeAwgTfbsUniform/wgEncodeAwgTfbsSydhK562Stat1Ifng30UniPk.narrowPeak.gz
K562	STAT1	Stanford	http://hgdownload.cse.ucsc.edu/goldenPath/hg19/encodeDCC/wgEncodeAwgTfbsUniform/wgEncodeAwgTfbsSydhK562Stat1Ifng6hUniPk.narrowPeak.gz
K562	STAT1	Yale	http://hgdownload.cse.ucsc.edu/goldenPath/hg19/encodeDCC/wgEncodeAwgTfbsUniform/wgEncodeAwgTfbsSydhK562Stat1Ifna30UniPk.narrowPeak.gz
K562	STAT1	Yale	http://hgdownload.cse.ucsc.edu/goldenPath/hg19/encodeDCC/wgEncodeAwgTfbsUniform/wgEncodeAwgTfbsSydhK562Stat1Ifna6hUniPk.narrowPeak.gz
K562	STAT2	Yale	http://hgdownload.cse.ucsc.edu/goldenPath/hg19/encodeDCC/wgEncodeAwgTfbsUniform/wgEncodeAwgTfbsSydhK562Stat2Ifna30UniPk.narrowPeak.gz
K562	STAT2	Yale	http://hgdownload.cse.ucsc.edu/goldenPath/hg19/encodeDCC/wgEncodeAwgTfbsUniform/wgEncodeAwgTfbsSydhK562Stat2Ifna6hUniPk.narrowPeak.gz
K562	STAT5A	HudsonAlpha	http://hgdownload.cse.ucsc.edu/goldenPath/hg19/encodeDCC/wgEncodeAwgTfbsUniform/wgEncodeAwgTfbsHaibK562Stat5asc74442V0422111UniPk.narrowPeak.gz
K562	TAF1	HudsonAlpha	http://hgdownload.cse.ucsc.edu/goldenPath/hg19/encodeDCC/wgEncodeAwgTfbsUniform/wgEncodeAwgTfbsHaibK562Taf1V0416101UniPk.narrowPeak.gz
K562	TAF7	HudsonAlpha	http://hgdownload.cse.ucsc.edu/goldenPath/hg19/encodeDCC/wgEncodeAwgTfbsUniform/wgEncodeAwgTfbsHaibK562Taf7sc101167V0416101UniPk.narrowPeak.gz
K562	TAL1	Stanford	http://hgdownload.cse.ucsc.edu/goldenPath/hg19/encodeDCC/wgEncodeAwgTfbsUniform/wgEncodeAwgTfbsSydhK562Tal1sc12984IggmusUniPk.narrowPeak.gz
K562	TBL1XR1	Stanford	http://hgdownload.cse.ucsc.edu/goldenPath/hg19/encodeDCC/wgEncodeAwgTfbsUniform/wgEncodeAwgTfbsSydhK562Tblr1ab24550IggrabUniPk.narrowPeak.gz
K562	TBL1XR1	Stanford	http://hgdownload.cse.ucsc.edu/goldenPath/hg19/encodeDCC/wgEncodeAwgTfbsUniform/wgEncodeAwgTfbsSydhK562Tblr1nb600270IggrabUniPk.narrowPeak.gz
K562	TBP	Stanford	http://hgdownload.cse.ucsc.edu/goldenPath/hg19/encodeDCC/wgEncodeAwgTfbsUniform/wgEncodeAwgTfbsSydhK562TbpIggmusUniPk.narrowPeak.gz
K562	TEAD4	HudsonAlpha	http://hgdownload.cse.ucsc.edu/goldenPath/hg19/encodeDCC/wgEncodeAwgTfbsUniform/wgEncodeAwgTfbsHaibK562Tead4sc101184V0422111UniPk.narrowPeak.gz
K562	THAP1	HudsonAlpha	http://hgdownload.cse.ucsc.edu/goldenPath/hg19/encodeDCC/wgEncodeAwgTfbsUniform/wgEncodeAwgTfbsHaibK562Thap1sc98174V0416101UniPk.narrowPeak.gz
K562	TRIM28	HudsonAlpha	http://hgdownload.cse.ucsc.edu/goldenPath/hg19/encodeDCC/wgEncodeAwgTfbsUniform/wgEncodeAwgTfbsHaibK562Trim28sc81411V0422111UniPk.narrowPeak.gz
K562	UBTF	Stanford	http://hgdownload.cse.ucsc.edu/goldenPath/hg19/encodeDCC/wgEncodeAwgTfbsUniform/wgEncodeAwgTfbsSydhK562Ubfsc13125IggmusUniPk.narrowPeak.gz
K562	UBTF	Stanford	http://hgdownload.cse.ucsc.edu/goldenPath/hg19/encodeDCC/wgEncodeAwgTfbsUniform/wgEncodeAwgTfbsSydhK562Ubtfsab1404509IggmusUniPk.narrowPeak.gz
K562	USF1	HudsonAlpha	http://hgdownload.cse.ucsc.edu/goldenPath/hg19/encodeDCC/wgEncodeAwgTfbsUniform/wgEncodeAwgTfbsHaibK562Usf1V0416101UniPk.narrowPeak.gz
K562	USF2	Stanford	http://hgdownload.cse.ucsc.edu/goldenPath/hg19/encodeDCC/wgEncodeAwgTfbsUniform/wgEncodeAwgTfbsSydhK562Usf2IggrabUniPk.narrowPeak.gz
K562	YY1	HudsonAlpha	http://hgdownload.cse.ucsc.edu/goldenPath/hg19/encodeDCC/wgEncodeAwgTfbsUniform/wgEncodeAwgTfbsHaibK562Yy1V0416101UniPk.narrowPeak.gz
K562	YY1	HudsonAlpha	http://hgdownload.cse.ucsc.edu/goldenPath/hg19/encodeDCC/wgEncodeAwgTfbsUniform/wgEncodeAwgTfbsHaibK562Yy1V0416102UniPk.narrowPeak.gz
K562	YY1	USC	http://hgdownload.cse.ucsc.edu/goldenPath/hg19/encodeDCC/wgEncodeAwgTfbsUniform/wgEncodeAwgTfbsSydhK562Yy1UcdUniPk.narrowPeak.gz
K562	ZBTB33	HudsonAlpha	http://hgdownload.cse.ucsc.edu/goldenPath/hg19/encodeDCC/wgEncodeAwgTfbsUniform/wgEncodeAwgTfbsHaibK562Zbtb33Pcr1xUniPk.narrowPeak.gz
K562	ZBTB7A	HudsonAlpha	http://hgdownload.cse.ucsc.edu/goldenPath/hg19/encodeDCC/wgEncodeAwgTfbsUniform/wgEncodeAwgTfbsHaibK562Zbtb7asc34508V0416101UniPk.narrowPeak.gz
K562	ZNF143	Stanford	http://hgdownload.cse.ucsc.edu/goldenPath/hg19/encodeDCC/wgEncodeAwgTfbsUniform/wgEncodeAwgTfbsSydhK562Znf143IggrabUniPk.narrowPeak.gz
K562	ZNF263	USC	http://hgdownload.cse.ucsc.edu/goldenPath/hg19/encodeDCC/wgEncodeAwgTfbsUniform/wgEncodeAwgTfbsSydhK562Znf263UcdUniPk.narrowPeak.gz
K562	ZNF274	USC	http://hgdownload.cse.ucsc.edu/goldenPath/hg19/encodeDCC/wgEncodeAwgTfbsUniform/wgEncodeAwgTfbsSydhK562Znf274m01UcdUniPk.narrowPeak.gz
K562	ZNF274	USC	http://hgdownload.cse.ucsc.edu/goldenPath/hg19/encodeDCC/wgEncodeAwgTfbsUniform/wgEncodeAwgTfbsSydhK562Znf274UcdUniPk.narrowPeak.gz
MCF-7	CTCF	UT-A	http://hgdownload.cse.ucsc.edu/goldenPath/hg19/encodeDCC/wgEncodeAwgTfbsUniform/wgEncodeAwgTfbsUtaMcf7CtcfUniPk.narrowPeak.gz
MCF-7	CTCF	UT-A	http://hgdownload.cse.ucsc.edu/goldenPath/hg19/encodeDCC/wgEncodeAwgTfbsUniform/wgEncodeAwgTfbsUtaMcf7CtcfEstroUniPk.narrowPeak.gz
MCF-7	CTCF	UT-A	http://hgdownload.cse.ucsc.edu/goldenPath/hg19/encodeDCC/wgEncodeAwgTfbsUniform/wgEncodeAwgTfbsUtaMcf7CtcfSerumstimUniPk.narrowPeak.gz
MCF-7	CTCF	UT-A	http://hgdownload.cse.ucsc.edu/goldenPath/hg19/encodeDCC/wgEncodeAwgTfbsUniform/wgEncodeAwgTfbsUtaMcf7CtcfSerumstvdUniPk.narrowPeak.gz
MCF-7	CTCF	UT-A	http://hgdownload.cse.ucsc.edu/goldenPath/hg19/encodeDCC/wgEncodeAwgTfbsUniform/wgEncodeAwgTfbsUtaMcf7CtcfVehUniPk.narrowPeak.gz
MCF-7	CTCF	UW	http://hgdownload.cse.ucsc.edu/goldenPath/hg19/encodeDCC/wgEncodeAwgTfbsUniform/wgEncodeAwgTfbsUwMcf7CtcfUniPk.narrowPeak.gz
MCF-7	E2F1	USC	http://hgdownload.cse.ucsc.edu/goldenPath/hg19/encodeDCC/wgEncodeAwgTfbsUniform/wgEncodeAwgTfbsSydhMcf7Hae2f1UcdUniPk.narrowPeak.gz
MCF-7	GATA3	USC	http://hgdownload.cse.ucsc.edu/goldenPath/hg19/encodeDCC/wgEncodeAwgTfbsUniform/wgEncodeAwgTfbsSydhMcf7Gata3sc269UcdUniPk.narrowPeak.gz
MCF-7	GATA3	USC	http://hgdownload.cse.ucsc.edu/goldenPath/hg19/encodeDCC/wgEncodeAwgTfbsUniform/wgEncodeAwgTfbsSydhMcf7Gata3UcdUniPk.narrowPeak.gz
MCF-7	MYC	UT-A	http://hgdownload.cse.ucsc.edu/goldenPath/hg19/encodeDCC/wgEncodeAwgTfbsUniform/wgEncodeAwgTfbsUtaMcf7CmycEstroUniPk.narrowPeak.gz
MCF-7	MYC	UT-A	http://hgdownload.cse.ucsc.edu/goldenPath/hg19/encodeDCC/wgEncodeAwgTfbsUniform/wgEncodeAwgTfbsUtaMcf7CmycSerumstimUniPk.narrowPeak.gz
MCF-7	MYC	UT-A	http://hgdownload.cse.ucsc.edu/goldenPath/hg19/encodeDCC/wgEncodeAwgTfbsUniform/wgEncodeAwgTfbsUtaMcf7CmycSerumstvdUniPk.narrowPeak.gz
MCF-7	MYC	UT-A	http://hgdownload.cse.ucsc.edu/goldenPath/hg19/encodeDCC/wgEncodeAwgTfbsUniform/wgEncodeAwgTfbsUtaMcf7CmycVehUniPk.narrowPeak.gz
MCF-7	POLR2A	UT-A	http://hgdownload.cse.ucsc.edu/goldenPath/hg19/encodeDCC/wgEncodeAwgTfbsUniform/wgEncodeAwgTfbsUtaMcf7Pol2UniPk.narrowPeak.gz
MCF-7	POLR2A	UT-A	http://hgdownload.cse.ucsc.edu/goldenPath/hg19/encodeDCC/wgEncodeAwgTfbsUniform/wgEncodeAwgTfbsUtaMcf7Pol2SerumstimUniPk.narrowPeak.gz
MCF-7	POLR2A	UT-A	http://hgdownload.cse.ucsc.edu/goldenPath/hg19/encodeDCC/wgEncodeAwgTfbsUniform/wgEncodeAwgTfbsUtaMcf7Pol2SerumstvdUniPk.narrowPeak.gz
MCF-7	TCF7L2	USC	http://hgdownload.cse.ucsc.edu/goldenPath/hg19/encodeDCC/wgEncodeAwgTfbsUniform/wgEncodeAwgTfbsSydhMcf7Tcf7l2UcdUniPk.narrowPeak.gz
MCF-7	ZNF217	USC	http://hgdownload.cse.ucsc.edu/goldenPath/hg19/encodeDCC/wgEncodeAwgTfbsUniform/wgEncodeAwgTfbsSydhMcf7Znf217UcdUniPk.narrowPeak.gz
MCF10A-Er-Src	E2F4	Harvard	http://hgdownload.cse.ucsc.edu/goldenPath/hg19/encodeDCC/wgEncodeAwgTfbsUniform/wgEncodeAwgTfbsSydhMcf10aesE2f4TamHvdUniPk.narrowPeak.gz
MCF10A-Er-Src	FOS	Harvard	http://hgdownload.cse.ucsc.edu/goldenPath/hg19/encodeDCC/wgEncodeAwgTfbsUniform/wgEncodeAwgTfbsSydhMcf10aesCfosEtoh01HvdUniPk.narrowPeak.gz
MCF10A-Er-Src	FOS	Harvard	http://hgdownload.cse.ucsc.edu/goldenPath/hg19/encodeDCC/wgEncodeAwgTfbsUniform/wgEncodeAwgTfbsSydhMcf10aesCfosTam112hHvdUniPk.narrowPeak.gz
MCF10A-Er-Src	FOS	Harvard	http://hgdownload.cse.ucsc.edu/goldenPath/hg19/encodeDCC/wgEncodeAwgTfbsUniform/wgEncodeAwgTfbsSydhMcf10aesCfosTam14hHvdUniPk.narrowPeak.gz
MCF10A-Er-Src	FOS	Harvard	http://hgdownload.cse.ucsc.edu/goldenPath/hg19/encodeDCC/wgEncodeAwgTfbsUniform/wgEncodeAwgTfbsSydhMcf10aesCfosTamHvdUniPk.narrowPeak.gz
MCF10A-Er-Src	MYC	Harvard	http://hgdownload.cse.ucsc.edu/goldenPath/hg19/encodeDCC/wgEncodeAwgTfbsUniform/wgEncodeAwgTfbsSydhMcf10aesCmycEtoh01HvdUniPk.narrowPeak.gz
MCF10A-Er-Src	MYC	Harvard	http://hgdownload.cse.ucsc.edu/goldenPath/hg19/encodeDCC/wgEncodeAwgTfbsUniform/wgEncodeAwgTfbsSydhMcf10aesCmycTam14hHvdUniPk.narrowPeak.gz
MCF10A-Er-Src	POLR2A	Harvard	http://hgdownload.cse.ucsc.edu/goldenPath/hg19/encodeDCC/wgEncodeAwgTfbsUniform/wgEncodeAwgTfbsSydhMcf10aesPol2Etoh01UniPk.narrowPeak.gz
MCF10A-Er-Src	POLR2A	Harvard	http://hgdownload.cse.ucsc.edu/goldenPath/hg19/encodeDCC/wgEncodeAwgTfbsUniform/wgEncodeAwgTfbsSydhMcf10aesPol2TamUniPk.narrowPeak.gz
MCF10A-Er-Src	STAT3	Harvard	http://hgdownload.cse.ucsc.edu/goldenPath/hg19/encodeDCC/wgEncodeAwgTfbsUniform/wgEncodeAwgTfbsSydhMcf10aesStat3Etoh01UniPk.narrowPeak.gz
MCF10A-Er-Src	STAT3	Harvard	http://hgdownload.cse.ucsc.edu/goldenPath/hg19/encodeDCC/wgEncodeAwgTfbsUniform/wgEncodeAwgTfbsSydhMcf10aesStat3Etoh01bUniPk.narrowPeak.gz
MCF10A-Er-Src	STAT3	Harvard	http://hgdownload.cse.ucsc.edu/goldenPath/hg19/encodeDCC/wgEncodeAwgTfbsUniform/wgEncodeAwgTfbsSydhMcf10aesStat3Etoh01cUniPk.narrowPeak.gz
MCF10A-Er-Src	STAT3	Harvard	http://hgdownload.cse.ucsc.edu/goldenPath/hg19/encodeDCC/wgEncodeAwgTfbsUniform/wgEncodeAwgTfbsSydhMcf10aesStat3TamUniPk.narrowPeak.gz
MCF10A-Er-Src	STAT3	Harvard	http://hgdownload.cse.ucsc.edu/goldenPath/hg19/encodeDCC/wgEncodeAwgTfbsUniform/wgEncodeAwgTfbsSydhMcf10aesStat3Tam112hHvdUniPk.narrowPeak.gz
NB4	CTCF	UW	http://hgdownload.cse.ucsc.edu/goldenPath/hg19/encodeDCC/wgEncodeAwgTfbsUniform/wgEncodeAwgTfbsUwNb4CtcfUniPk.narrowPeak.gz
NB4	MAX	Stanford	http://hgdownload.cse.ucsc.edu/goldenPath/hg19/encodeDCC/wgEncodeAwgTfbsUniform/wgEncodeAwgTfbsSydhNb4MaxUniPk.narrowPeak.gz
NB4	MYC	Stanford	http://hgdownload.cse.ucsc.edu/goldenPath/hg19/encodeDCC/wgEncodeAwgTfbsUniform/wgEncodeAwgTfbsSydhNb4CmycUniPk.narrowPeak.gz
NB4	POLR2A	Yale	http://hgdownload.cse.ucsc.edu/goldenPath/hg19/encodeDCC/wgEncodeAwgTfbsUniform/wgEncodeAwgTfbsSydhNb4Pol2UniPk.narrowPeak.gz
NH-A	CTCF	Broad	http://hgdownload.cse.ucsc.edu/goldenPath/hg19/encodeDCC/wgEncodeAwgTfbsUniform/wgEncodeAwgTfbsBroadNhaCtcfUniPk.narrowPeak.gz
NH-A	EZH2	Broad	http://hgdownload.cse.ucsc.edu/goldenPath/hg19/encodeDCC/wgEncodeAwgTfbsUniform/wgEncodeAwgTfbsBroadNhaEzh239875UniPk.narrowPeak.gz
NHDF-Ad	CTCF	Broad	http://hgdownload.cse.ucsc.edu/goldenPath/hg19/encodeDCC/wgEncodeAwgTfbsUniform/wgEncodeAwgTfbsBroadNhdfadCtcfUniPk.narrowPeak.gz
NHDF-Ad	EZH2	Broad	http://hgdownload.cse.ucsc.edu/goldenPath/hg19/encodeDCC/wgEncodeAwgTfbsUniform/wgEncodeAwgTfbsBroadNhdfadEzh239875UniPk.narrowPeak.gz
NHDF-neo	CTCF	UW	http://hgdownload.cse.ucsc.edu/goldenPath/hg19/encodeDCC/wgEncodeAwgTfbsUniform/wgEncodeAwgTfbsUwNhdfneoCtcfUniPk.narrowPeak.gz
NHEK	CTCF	Broad	http://hgdownload.cse.ucsc.edu/goldenPath/hg19/encodeDCC/wgEncodeAwgTfbsUniform/wgEncodeAwgTfbsBroadNhekCtcfUniPk.narrowPeak.gz
NHEK	CTCF	UT-A	http://hgdownload.cse.ucsc.edu/goldenPath/hg19/encodeDCC/wgEncodeAwgTfbsUniform/wgEncodeAwgTfbsUtaNhekCtcfUniPk.narrowPeak.gz
NHEK	CTCF	UW	http://hgdownload.cse.ucsc.edu/goldenPath/hg19/encodeDCC/wgEncodeAwgTfbsUniform/wgEncodeAwgTfbsUwNhekCtcfUniPk.narrowPeak.gz
NHEK	EZH2	Broad	http://hgdownload.cse.ucsc.edu/goldenPath/hg19/encodeDCC/wgEncodeAwgTfbsUniform/wgEncodeAwgTfbsBroadNhekEzh239875UniPk.narrowPeak.gz
NHEK	POLR2A	Broad	http://hgdownload.cse.ucsc.edu/goldenPath/hg19/encodeDCC/wgEncodeAwgTfbsUniform/wgEncodeAwgTfbsBroadNhekPol2bUniPk.narrowPeak.gz
NHLF	CTCF	Broad	http://hgdownload.cse.ucsc.edu/goldenPath/hg19/encodeDCC/wgEncodeAwgTfbsUniform/wgEncodeAwgTfbsBroadNhlfCtcfUniPk.narrowPeak.gz
NHLF	CTCF	UW	http://hgdownload.cse.ucsc.edu/goldenPath/hg19/encodeDCC/wgEncodeAwgTfbsUniform/wgEncodeAwgTfbsUwNhlfCtcfUniPk.narrowPeak.gz
NHLF	EZH2	Broad	http://hgdownload.cse.ucsc.edu/goldenPath/hg19/encodeDCC/wgEncodeAwgTfbsUniform/wgEncodeAwgTfbsBroadNhlfEzh239875UniPk.narrowPeak.gz
NT2-D1	SUZ12	USC	http://hgdownload.cse.ucsc.edu/goldenPath/hg19/encodeDCC/wgEncodeAwgTfbsUniform/wgEncodeAwgTfbsSydhNt2d1Suz12UcdUniPk.narrowPeak.gz
NT2-D1	YY1	USC	http://hgdownload.cse.ucsc.edu/goldenPath/hg19/encodeDCC/wgEncodeAwgTfbsUniform/wgEncodeAwgTfbsSydhNt2d1Yy1UcdUniPk.narrowPeak.gz
NT2-D1	ZNF274	USC	http://hgdownload.cse.ucsc.edu/goldenPath/hg19/encodeDCC/wgEncodeAwgTfbsUniform/wgEncodeAwgTfbsSydhNt2d1Znf274UcdUniPk.narrowPeak.gz
Osteobl	CTCF	Broad	http://hgdownload.cse.ucsc.edu/goldenPath/hg19/encodeDCC/wgEncodeAwgTfbsUniform/wgEncodeAwgTfbsBroadOsteoblCtcfUniPk.narrowPeak.gz
PANC-1	POLR2A	HudsonAlpha	http://hgdownload.cse.ucsc.edu/goldenPath/hg19/encodeDCC/wgEncodeAwgTfbsUniform/wgEncodeAwgTfbsHaibPanc1Pol24h8V0416101UniPk.narrowPeak.gz
PANC-1	REST	HudsonAlpha	http://hgdownload.cse.ucsc.edu/goldenPath/hg19/encodeDCC/wgEncodeAwgTfbsUniform/wgEncodeAwgTfbsHaibPanc1NrsfPcr2xUniPk.narrowPeak.gz
PANC-1	SIN3AK20	HudsonAlpha	http://hgdownload.cse.ucsc.edu/goldenPath/hg19/encodeDCC/wgEncodeAwgTfbsUniform/wgEncodeAwgTfbsHaibPanc1Sin3ak20V0416101UniPk.narrowPeak.gz
PANC-1	TCF7L2	USC	http://hgdownload.cse.ucsc.edu/goldenPath/hg19/encodeDCC/wgEncodeAwgTfbsUniform/wgEncodeAwgTfbsSydhPanc1Tcf7l2UcdUniPk.narrowPeak.gz
PBDE	GATA1	USC	http://hgdownload.cse.ucsc.edu/goldenPath/hg19/encodeDCC/wgEncodeAwgTfbsUniform/wgEncodeAwgTfbsSydhPbdeGata1UcdUniPk.narrowPeak.gz
PBDE	POLR2A	USC	http://hgdownload.cse.ucsc.edu/goldenPath/hg19/encodeDCC/wgEncodeAwgTfbsUniform/wgEncodeAwgTfbsSydhPbdePol2UcdUniPk.narrowPeak.gz
PBDEFetal	GATA1	USC	http://hgdownload.cse.ucsc.edu/goldenPath/hg19/encodeDCC/wgEncodeAwgTfbsUniform/wgEncodeAwgTfbsSydhPbdefetalGata1UcdUniPk.narrowPeak.gz
PFSK-1	FOXP2	HudsonAlpha	http://hgdownload.cse.ucsc.edu/goldenPath/hg19/encodeDCC/wgEncodeAwgTfbsUniform/wgEncodeAwgTfbsHaibPfsk1Foxp2Pcr2xUniPk.narrowPeak.gz
PFSK-1	REST	HudsonAlpha	http://hgdownload.cse.ucsc.edu/goldenPath/hg19/encodeDCC/wgEncodeAwgTfbsUniform/wgEncodeAwgTfbsHaibPfsk1NrsfPcr2xUniPk.narrowPeak.gz
PFSK-1	SIN3AK20	HudsonAlpha	http://hgdownload.cse.ucsc.edu/goldenPath/hg19/encodeDCC/wgEncodeAwgTfbsUniform/wgEncodeAwgTfbsHaibPfsk1Sin3ak20V0416101UniPk.narrowPeak.gz
PFSK-1	TAF1	HudsonAlpha	http://hgdownload.cse.ucsc.edu/goldenPath/hg19/encodeDCC/wgEncodeAwgTfbsUniform/wgEncodeAwgTfbsHaibPfsk1Taf1V0416101UniPk.narrowPeak.gz
ProgFib	CTCF	UT-A	http://hgdownload.cse.ucsc.edu/goldenPath/hg19/encodeDCC/wgEncodeAwgTfbsUniform/wgEncodeAwgTfbsUtaProgfibCtcfUniPk.narrowPeak.gz
ProgFib	POLR2A	UT-A	http://hgdownload.cse.ucsc.edu/goldenPath/hg19/encodeDCC/wgEncodeAwgTfbsUniform/wgEncodeAwgTfbsUtaProgfibPol2UniPk.narrowPeak.gz
Raji	POLR2A	USC	http://hgdownload.cse.ucsc.edu/goldenPath/hg19/encodeDCC/wgEncodeAwgTfbsUniform/wgEncodeAwgTfbsSydhRajiPol2UcdUniPk.narrowPeak.gz
RPTEC	CTCF	UW	http://hgdownload.cse.ucsc.edu/goldenPath/hg19/encodeDCC/wgEncodeAwgTfbsUniform/wgEncodeAwgTfbsUwRptecCtcfUniPk.narrowPeak.gz
SAEC	CTCF	UW	http://hgdownload.cse.ucsc.edu/goldenPath/hg19/encodeDCC/wgEncodeAwgTfbsUniform/wgEncodeAwgTfbsUwSaecCtcfUniPk.narrowPeak.gz
SH-SY5Y	GATA2	USC	http://hgdownload.cse.ucsc.edu/goldenPath/hg19/encodeDCC/wgEncodeAwgTfbsUniform/wgEncodeAwgTfbsSydhShsy5yGata2UcdUniPk.narrowPeak.gz
SH-SY5Y	GATA3	USC	http://hgdownload.cse.ucsc.edu/goldenPath/hg19/encodeDCC/wgEncodeAwgTfbsUniform/wgEncodeAwgTfbsSydhShsy5yGata3sc269sc269UcdUniPk.narrowPeak.gz
SK-N-MC	FOXP2	HudsonAlpha	http://hgdownload.cse.ucsc.edu/goldenPath/hg19/encodeDCC/wgEncodeAwgTfbsUniform/wgEncodeAwgTfbsHaibSknmcFoxp2Pcr2xUniPk.narrowPeak.gz
SK-N-MC	POLR2A	HudsonAlpha	http://hgdownload.cse.ucsc.edu/goldenPath/hg19/encodeDCC/wgEncodeAwgTfbsUniform/wgEncodeAwgTfbsHaibSknmcPol24h8V0416101UniPk.narrowPeak.gz
SK-N-SH	POLR2A	HudsonAlpha	http://hgdownload.cse.ucsc.edu/goldenPath/hg19/encodeDCC/wgEncodeAwgTfbsUniform/wgEncodeAwgTfbsHaibSknshPol24h8V0416101UniPk.narrowPeak.gz
SK-N-SH	REST	HudsonAlpha	http://hgdownload.cse.ucsc.edu/goldenPath/hg19/encodeDCC/wgEncodeAwgTfbsUniform/wgEncodeAwgTfbsHaibSknshNrsfPcr2xUniPk.narrowPeak.gz
SK-N-SH	REST	HudsonAlpha	http://hgdownload.cse.ucsc.edu/goldenPath/hg19/encodeDCC/wgEncodeAwgTfbsUniform/wgEncodeAwgTfbsHaibSknshNrsfV0416101UniPk.narrowPeak.gz
SK-N-SH	SIN3AK20	HudsonAlpha	http://hgdownload.cse.ucsc.edu/goldenPath/hg19/encodeDCC/wgEncodeAwgTfbsUniform/wgEncodeAwgTfbsHaibSknshSin3ak20V0416101UniPk.narrowPeak.gz
SK-N-SH	TAF1	HudsonAlpha	http://hgdownload.cse.ucsc.edu/goldenPath/hg19/encodeDCC/wgEncodeAwgTfbsUniform/wgEncodeAwgTfbsHaibSknshTaf1V0416101UniPk.narrowPeak.gz
SK-N-SH_RA	CTCF	HudsonAlpha	http://hgdownload.cse.ucsc.edu/goldenPath/hg19/encodeDCC/wgEncodeAwgTfbsUniform/wgEncodeAwgTfbsHaibSknshraCtcfV0416102UniPk.narrowPeak.gz
SK-N-SH_RA	CTCF	UW	http://hgdownload.cse.ucsc.edu/goldenPath/hg19/encodeDCC/wgEncodeAwgTfbsUniform/wgEncodeAwgTfbsUwSknshraCtcfUniPk.narrowPeak.gz
SK-N-SH_RA	EP300	HudsonAlpha	http://hgdownload.cse.ucsc.edu/goldenPath/hg19/encodeDCC/wgEncodeAwgTfbsUniform/wgEncodeAwgTfbsHaibSknshraP300V0416102UniPk.narrowPeak.gz
SK-N-SH_RA	RAD21	HudsonAlpha	http://hgdownload.cse.ucsc.edu/goldenPath/hg19/encodeDCC/wgEncodeAwgTfbsUniform/wgEncodeAwgTfbsHaibSknshraRad21V0416102UniPk.narrowPeak.gz
SK-N-SH_RA	USF1	HudsonAlpha	http://hgdownload.cse.ucsc.edu/goldenPath/hg19/encodeDCC/wgEncodeAwgTfbsUniform/wgEncodeAwgTfbsHaibSknshraUsf1sc8983V0416102UniPk.narrowPeak.gz
SK-N-SH_RA	YY1	HudsonAlpha	http://hgdownload.cse.ucsc.edu/goldenPath/hg19/encodeDCC/wgEncodeAwgTfbsUniform/wgEncodeAwgTfbsHaibSknshraYy1sc281V0416102UniPk.narrowPeak.gz
T-47D	CTCF	HudsonAlpha	http://hgdownload.cse.ucsc.edu/goldenPath/hg19/encodeDCC/wgEncodeAwgTfbsUniform/wgEncodeAwgTfbsHaibT47dCtcfsc5916V0416102Dm002p1hUniPk.narrowPeak.gz
T-47D	EP300	HudsonAlpha	http://hgdownload.cse.ucsc.edu/goldenPath/hg19/encodeDCC/wgEncodeAwgTfbsUniform/wgEncodeAwgTfbsHaibT47dP300V0416102Dm002p1hUniPk.narrowPeak.gz
T-47D	ESR1	HudsonAlpha	http://hgdownload.cse.ucsc.edu/goldenPath/hg19/encodeDCC/wgEncodeAwgTfbsUniform/wgEncodeAwgTfbsHaibT47dEraaV0416102Bpa1hUniPk.narrowPeak.gz
T-47D	ESR1	HudsonAlpha	http://hgdownload.cse.ucsc.edu/goldenPath/hg19/encodeDCC/wgEncodeAwgTfbsUniform/wgEncodeAwgTfbsHaibT47dEralphaaPcr2xGen1hUniPk.narrowPeak.gz
T-47D	ESR1	HudsonAlpha	http://hgdownload.cse.ucsc.edu/goldenPath/hg19/encodeDCC/wgEncodeAwgTfbsUniform/wgEncodeAwgTfbsHaibT47dEralphaaV0416102Est10nm1hUniPk.narrowPeak.gz
T-47D	FOXA1	HudsonAlpha	http://hgdownload.cse.ucsc.edu/goldenPath/hg19/encodeDCC/wgEncodeAwgTfbsUniform/wgEncodeAwgTfbsHaibT47dFoxa1sc6553V0416102Dm002p1hUniPk.narrowPeak.gz
T-47D	GATA3	HudsonAlpha	http://hgdownload.cse.ucsc.edu/goldenPath/hg19/encodeDCC/wgEncodeAwgTfbsUniform/wgEncodeAwgTfbsHaibT47dGata3sc268V0416102Dm002p1hUniPk.narrowPeak.gz
U2OS	KAP1	USC	http://hgdownload.cse.ucsc.edu/goldenPath/hg19/encodeDCC/wgEncodeAwgTfbsUniform/wgEncodeAwgTfbsSydhU2osKap1UcdUniPk.narrowPeak.gz
U2OS	SETDB1	USC	http://hgdownload.cse.ucsc.edu/goldenPath/hg19/encodeDCC/wgEncodeAwgTfbsUniform/wgEncodeAwgTfbsSydhU2osSetdb1UcdUniPk.narrowPeak.gz
U87	POLR2A	HudsonAlpha	http://hgdownload.cse.ucsc.edu/goldenPath/hg19/encodeDCC/wgEncodeAwgTfbsUniform/wgEncodeAwgTfbsHaibU87Pol24h8V0416101UniPk.narrowPeak.gz
U87	REST	HudsonAlpha	http://hgdownload.cse.ucsc.edu/goldenPath/hg19/encodeDCC/wgEncodeAwgTfbsUniform/wgEncodeAwgTfbsHaibU87NrsfPcr2xUniPk.narrowPeak.gz
WERI-Rb-1	CTCF	UW	http://hgdownload.cse.ucsc.edu/goldenPath/hg19/encodeDCC/wgEncodeAwgTfbsUniform/wgEncodeAwgTfbsUwWerirb1CtcfUniPk.narrowPeak.gz
WI-38	CTCF	UW	http://hgdownload.cse.ucsc.edu/goldenPath/hg19/encodeDCC/wgEncodeAwgTfbsUniform/wgEncodeAwgTfbsUwWi38CtcfUniPk.narrowPeak.gz

## Sheet: HMs
Cell	Antibody	Lab	Treatment	GEO Sample	URL
A549	CTCF	Broad	DEX_100nM	GSM1003582	http://hgdownload.cse.ucsc.edu/goldenPath/hg19/encodeDCC/wgEncodeBroadHistone/wgEncodeBroadHistoneA549CtcfDex100nmPk.broadPeak.gz
A549	CTCF	Broad	EtOH_0.02pct	GSM1003581	http://hgdownload.cse.ucsc.edu/goldenPath/hg19/encodeDCC/wgEncodeBroadHistone/wgEncodeBroadHistoneA549CtcfEtoh02Pk.broadPeak.gz
A549	H2A.Z	Broad	DEX_100nM	GSM1003580	http://hgdownload.cse.ucsc.edu/goldenPath/hg19/encodeDCC/wgEncodeBroadHistone/wgEncodeBroadHistoneA549H2azDex100nmPk.broadPeak.gz
A549	H2A.Z	Broad	EtOH_0.02pct	GSM1003546	http://hgdownload.cse.ucsc.edu/goldenPath/hg19/encodeDCC/wgEncodeBroadHistone/wgEncodeBroadHistoneA549H2azEtoh02Pk.broadPeak.gz
A549	H3K27ac	Broad	DEX_100nM	GSM1003493	http://hgdownload.cse.ucsc.edu/goldenPath/hg19/encodeDCC/wgEncodeBroadHistone/wgEncodeBroadHistoneA549H3k27acDex100nmPk.broadPeak.gz
A549	H3K27ac	Broad	EtOH_0.02pct	GSM1003578	http://hgdownload.cse.ucsc.edu/goldenPath/hg19/encodeDCC/wgEncodeBroadHistone/wgEncodeBroadHistoneA549H3k27acEtoh02Pk.broadPeak.gz
A549	H3K27me3	Broad	DEX_100nM	GSM1003577	http://hgdownload.cse.ucsc.edu/goldenPath/hg19/encodeDCC/wgEncodeBroadHistone/wgEncodeBroadHistoneA549H3k27me3Dex100nmPk.broadPeak.gz
A549	H3K27me3	Broad	EtOH_0.02pct	GSM1003455	http://hgdownload.cse.ucsc.edu/goldenPath/hg19/encodeDCC/wgEncodeBroadHistone/wgEncodeBroadHistoneA549H3k27me3Etoh02Pk.broadPeak.gz
A549	H3K36me3	Broad	DEX_100nM	GSM1003494	http://hgdownload.cse.ucsc.edu/goldenPath/hg19/encodeDCC/wgEncodeBroadHistone/wgEncodeBroadHistoneA549H3k36me3Dex100nmPk.broadPeak.gz
A549	H3K36me3	Broad	EtOH_0.02pct	GSM1003456	http://hgdownload.cse.ucsc.edu/goldenPath/hg19/encodeDCC/wgEncodeBroadHistone/wgEncodeBroadHistoneA549H3k36me3Etoh02Pk.broadPeak.gz
A549	H3K4me1	Broad	DEX_100nM	GSM1003495	http://hgdownload.cse.ucsc.edu/goldenPath/hg19/encodeDCC/wgEncodeBroadHistone/wgEncodeBroadHistoneA549H3k04me1Dex100nmPk.broadPeak.gz
A549	H3K4me1	Broad	EtOH_0.02pct	GSM1003453	http://hgdownload.cse.ucsc.edu/goldenPath/hg19/encodeDCC/wgEncodeBroadHistone/wgEncodeBroadHistoneA549H3k04me1Etoh02Pk.broadPeak.gz
A549	H3K4me2	Broad	DEX_100nM	GSM1003511	http://hgdownload.cse.ucsc.edu/goldenPath/hg19/encodeDCC/wgEncodeBroadHistone/wgEncodeBroadHistoneA549H3k04me2Dex100nmPk.broadPeak.gz
A549	H3K4me2	Broad	EtOH_0.02pct	GSM1003496	http://hgdownload.cse.ucsc.edu/goldenPath/hg19/encodeDCC/wgEncodeBroadHistone/wgEncodeBroadHistoneA549H3k04me2Etoh02Pk.broadPeak.gz
A549	H3K4me3	Broad	DEX_100nM	GSM1003542	http://hgdownload.cse.ucsc.edu/goldenPath/hg19/encodeDCC/wgEncodeBroadHistone/wgEncodeBroadHistoneA549H3k04me3Dex100nmPk.broadPeak.gz
A549	H3K4me3	Broad	EtOH_0.02pct	GSM1003561	http://hgdownload.cse.ucsc.edu/goldenPath/hg19/encodeDCC/wgEncodeBroadHistone/wgEncodeBroadHistoneA549H3k04me3Etoh02Pk.broadPeak.gz
A549	H3K4me3	UW	None	GSM945244	http://hgdownload.cse.ucsc.edu/goldenPath/hg19/encodeDCC/wgEncodeUwHistone/wgEncodeUwHistoneA549H3k04me3StdPkRep1.narrowPeak.gz
A549	H3K4me3	UW	None	GSM945244	http://hgdownload.cse.ucsc.edu/goldenPath/hg19/encodeDCC/wgEncodeUwHistone/wgEncodeUwHistoneA549H3k04me3StdHotspotsRep1.broadPeak.gz
A549	H3K79me2	Broad	DEX_100nM	GSM1003543	http://hgdownload.cse.ucsc.edu/goldenPath/hg19/encodeDCC/wgEncodeBroadHistone/wgEncodeBroadHistoneA549H3k79me2Dex100nmPk.broadPeak.gz
A549	H3K79me2	Broad	EtOH_0.02pct	GSM1003512	http://hgdownload.cse.ucsc.edu/goldenPath/hg19/encodeDCC/wgEncodeBroadHistone/wgEncodeBroadHistoneA549H3k79me2Etoh02Pk.broadPeak.gz
A549	H3K9ac	Broad	EtOH_0.02pct	GSM1003544	http://hgdownload.cse.ucsc.edu/goldenPath/hg19/encodeDCC/wgEncodeBroadHistone/wgEncodeBroadHistoneA549H3k09acEtoh02Pk.broadPeak.gz
A549	H3K9me3	Broad	EtOH_0.02pct	GSM1003454	http://hgdownload.cse.ucsc.edu/goldenPath/hg19/encodeDCC/wgEncodeBroadHistone/wgEncodeBroadHistoneA549H3k09me3Etoh02Pk.broadPeak.gz
A549	H4K20me1	Broad	EtOH_0.02pct	GSM1003458	http://hgdownload.cse.ucsc.edu/goldenPath/hg19/encodeDCC/wgEncodeBroadHistone/wgEncodeBroadHistoneA549H4k20me1Etoh02Pk.broadPeak.gz
AG04449	H3K4me3	UW	None	GSM945187	http://hgdownload.cse.ucsc.edu/goldenPath/hg19/encodeDCC/wgEncodeUwHistone/wgEncodeUwHistoneAg04449H3k4me3StdPkRep1.narrowPeak.gz
AG04449	H3K4me3	UW	None	GSM945187	http://hgdownload.cse.ucsc.edu/goldenPath/hg19/encodeDCC/wgEncodeUwHistone/wgEncodeUwHistoneAg04449H3k4me3StdHotspotsRep1.broadPeak.gz
AG04450	H3K27ac	UW	None	GSM1010912	http://hgdownload.cse.ucsc.edu/goldenPath/hg19/encodeDCC/wgEncodeUwHistone/wgEncodeUwHistoneAg04450H3k27acStdPkRep1.narrowPeak.gz
AG04450	H3K27ac	UW	None	GSM1010912	http://hgdownload.cse.ucsc.edu/goldenPath/hg19/encodeDCC/wgEncodeUwHistone/wgEncodeUwHistoneAg04450H3k27acStdHotspotsRep1.broadPeak.gz
AG04450	H3K27me3	UW	None	GSM1010913	http://hgdownload.cse.ucsc.edu/goldenPath/hg19/encodeDCC/wgEncodeUwHistone/wgEncodeUwHistoneAg04450H3k27me3StdPkRep1.narrowPeak.gz
AG04450	H3K27me3	UW	None	GSM1010913	http://hgdownload.cse.ucsc.edu/goldenPath/hg19/encodeDCC/wgEncodeUwHistone/wgEncodeUwHistoneAg04450H3k27me3StdHotspotsRep1.broadPeak.gz
AG04450	H3K4me3	UW	None	GSM945177	http://hgdownload.cse.ucsc.edu/goldenPath/hg19/encodeDCC/wgEncodeUwHistone/wgEncodeUwHistoneAg04450H3k4me3StdPkRep1.narrowPeak.gz
AG04450	H3K4me3	UW	None	GSM945177	http://hgdownload.cse.ucsc.edu/goldenPath/hg19/encodeDCC/wgEncodeUwHistone/wgEncodeUwHistoneAg04450H3k4me3StdHotspotsRep1.broadPeak.gz
AG04450	H3K9me3	UW	None	GSM1010914	http://hgdownload.cse.ucsc.edu/goldenPath/hg19/encodeDCC/wgEncodeUwHistone/wgEncodeUwHistoneAg04450H3k09me3StdPkRep1.narrowPeak.gz
AG04450	H3K9me3	UW	None	GSM1010914	http://hgdownload.cse.ucsc.edu/goldenPath/hg19/encodeDCC/wgEncodeUwHistone/wgEncodeUwHistoneAg04450H3k09me3StdHotspotsRep1.broadPeak.gz
AG09309	H3K4me3	UW	None	GSM945168	http://hgdownload.cse.ucsc.edu/goldenPath/hg19/encodeDCC/wgEncodeUwHistone/wgEncodeUwHistoneAg09309H3k4me3StdPkRep1.narrowPeak.gz
AG09309	H3K4me3	UW	None	GSM945168	http://hgdownload.cse.ucsc.edu/goldenPath/hg19/encodeDCC/wgEncodeUwHistone/wgEncodeUwHistoneAg09309H3k4me3StdHotspotsRep1.broadPeak.gz
AG09319	H3K4me3	UW	None	GSM945166	http://hgdownload.cse.ucsc.edu/goldenPath/hg19/encodeDCC/wgEncodeUwHistone/wgEncodeUwHistoneAg09319H3k4me3StdPkRep1.narrowPeak.gz
AG09319	H3K4me3	UW	None	GSM945166	http://hgdownload.cse.ucsc.edu/goldenPath/hg19/encodeDCC/wgEncodeUwHistone/wgEncodeUwHistoneAg09319H3k4me3StdHotspotsRep1.broadPeak.gz
AG10803	H3K4me3	UW	None	GSM945172	http://hgdownload.cse.ucsc.edu/goldenPath/hg19/encodeDCC/wgEncodeUwHistone/wgEncodeUwHistoneAg10803H3k4me3StdPkRep1.narrowPeak.gz
AG10803	H3K4me3	UW	None	GSM945172	http://hgdownload.cse.ucsc.edu/goldenPath/hg19/encodeDCC/wgEncodeUwHistone/wgEncodeUwHistoneAg10803H3k4me3StdHotspotsRep1.broadPeak.gz
AoAF	H3K4me3	UW	None	GSM945170	http://hgdownload.cse.ucsc.edu/goldenPath/hg19/encodeDCC/wgEncodeUwHistone/wgEncodeUwHistoneAoafH3k4me3StdPkRep1.narrowPeak.gz
AoAF	H3K4me3	UW	None	GSM945170	http://hgdownload.cse.ucsc.edu/goldenPath/hg19/encodeDCC/wgEncodeUwHistone/wgEncodeUwHistoneAoafH3k4me3StdHotspotsRep1.broadPeak.gz
BE2_C	H3K4me3	UW	None	GSM945241	http://hgdownload.cse.ucsc.edu/goldenPath/hg19/encodeDCC/wgEncodeUwHistone/wgEncodeUwHistoneBe2cH3k04me3StdPkRep1.narrowPeak.gz
BE2_C	H3K4me3	UW	None	GSM945241	http://hgdownload.cse.ucsc.edu/goldenPath/hg19/encodeDCC/wgEncodeUwHistone/wgEncodeUwHistoneBe2cH3k04me3StdHotspotsRep1.broadPeak.gz
BJ	H3K27me3	UW	None	GSM945204	http://hgdownload.cse.ucsc.edu/goldenPath/hg19/encodeDCC/wgEncodeUwHistone/wgEncodeUwHistoneBjH3k27me3StdPkRep1.narrowPeak.gz
BJ	H3K27me3	UW	None	GSM945204	http://hgdownload.cse.ucsc.edu/goldenPath/hg19/encodeDCC/wgEncodeUwHistone/wgEncodeUwHistoneBjH3k27me3StdHotspotsRep1.broadPeak.gz
BJ	H3K36me3	UW	None	GSM945207	http://hgdownload.cse.ucsc.edu/goldenPath/hg19/encodeDCC/wgEncodeUwHistone/wgEncodeUwHistoneBjH3k36me3StdPkRep1.narrowPeak.gz
BJ	H3K36me3	UW	None	GSM945207	http://hgdownload.cse.ucsc.edu/goldenPath/hg19/encodeDCC/wgEncodeUwHistone/wgEncodeUwHistoneBjH3k36me3StdHotspotsRep1.broadPeak.gz
BJ	H3K4me3	UW	None	GSM945178	http://hgdownload.cse.ucsc.edu/goldenPath/hg19/encodeDCC/wgEncodeUwHistone/wgEncodeUwHistoneBjH3k4me3StdPkRep1.narrowPeak.gz
BJ	H3K4me3	UW	None	GSM945178	http://hgdownload.cse.ucsc.edu/goldenPath/hg19/encodeDCC/wgEncodeUwHistone/wgEncodeUwHistoneBjH3k4me3StdHotspotsRep1.broadPeak.gz
Caco-2	H3K27me3	UW	None	GSM945203	http://hgdownload.cse.ucsc.edu/goldenPath/hg19/encodeDCC/wgEncodeUwHistone/wgEncodeUwHistoneCaco2H3k27me3StdPkRep1.narrowPeak.gz
Caco-2	H3K27me3	UW	None	GSM945203	http://hgdownload.cse.ucsc.edu/goldenPath/hg19/encodeDCC/wgEncodeUwHistone/wgEncodeUwHistoneCaco2H3k27me3StdHotspotsRep1.broadPeak.gz
Caco-2	H3K36me3	UW	None	GSM945206	http://hgdownload.cse.ucsc.edu/goldenPath/hg19/encodeDCC/wgEncodeUwHistone/wgEncodeUwHistoneCaco2H3k36me3StdPkRep1.narrowPeak.gz
Caco-2	H3K36me3	UW	None	GSM945206	http://hgdownload.cse.ucsc.edu/goldenPath/hg19/encodeDCC/wgEncodeUwHistone/wgEncodeUwHistoneCaco2H3k36me3StdHotspotsRep1.broadPeak.gz
Caco-2	H3K4me3	UW	None	GSM945162	http://hgdownload.cse.ucsc.edu/goldenPath/hg19/encodeDCC/wgEncodeUwHistone/wgEncodeUwHistoneCaco2H3k4me3StdPkRep1.narrowPeak.gz
Caco-2	H3K4me3	UW	None	GSM945162	http://hgdownload.cse.ucsc.edu/goldenPath/hg19/encodeDCC/wgEncodeUwHistone/wgEncodeUwHistoneCaco2H3k4me3StdHotspotsRep1.broadPeak.gz
CD20+	CTCF	Broad	None	GSM1003474	http://hgdownload.cse.ucsc.edu/goldenPath/hg19/encodeDCC/wgEncodeBroadHistone/wgEncodeBroadHistoneCd20CtcfPk.broadPeak.gz
CD20+	H2A.Z	Broad	None	GSM1003476	http://hgdownload.cse.ucsc.edu/goldenPath/hg19/encodeDCC/wgEncodeBroadHistone/wgEncodeBroadHistoneCd20H2azPk.broadPeak.gz
CD20+	H3K4me2	Broad	None	GSM1003471	http://hgdownload.cse.ucsc.edu/goldenPath/hg19/encodeDCC/wgEncodeBroadHistone/wgEncodeBroadHistoneCd20H3k04me2Pk.broadPeak.gz
CD20+_RO01778	H3K4me3	UW	None	GSM945229	http://hgdownload.cse.ucsc.edu/goldenPath/hg19/encodeDCC/wgEncodeUwHistone/wgEncodeUwHistoneCd20ro01778H3k04me3StdPkRep1.narrowPeak.gz
CD20+_RO01778	H3K4me3	UW	None	GSM945229	http://hgdownload.cse.ucsc.edu/goldenPath/hg19/encodeDCC/wgEncodeUwHistone/wgEncodeUwHistoneCd20ro01778H3k04me3StdHotspotsRep1.broadPeak.gz
CD20+_RO01794	EZH2_(39875)	Broad	None	GSM1003470	http://hgdownload.cse.ucsc.edu/goldenPath/hg19/encodeDCC/wgEncodeBroadHistone/wgEncodeBroadHistoneCd20ro01794Ezh239875Pk.broadPeak.gz
CD20+_RO01794	H3K27ac	Broad	None	GSM1003459	http://hgdownload.cse.ucsc.edu/goldenPath/hg19/encodeDCC/wgEncodeBroadHistone/wgEncodeBroadHistoneCd20ro01794H3k27acPk.broadPeak.gz
CD20+_RO01794	H3K4me3	UW	None	GSM945198	http://hgdownload.cse.ucsc.edu/goldenPath/hg19/encodeDCC/wgEncodeUwHistone/wgEncodeUwHistoneCd20ro01794H3k04me3StdPkRep3.narrowPeak.gz
CD20+_RO01794	H3K4me3	UW	None	GSM945198	http://hgdownload.cse.ucsc.edu/goldenPath/hg19/encodeDCC/wgEncodeUwHistone/wgEncodeUwHistoneCd20ro01778H3k04me3StdHotspotsRep1.broadPeak.gz
CD20+_RO01794	H4K20me1	Broad	None	GSM1003497	http://hgdownload.cse.ucsc.edu/goldenPath/hg19/encodeDCC/wgEncodeBroadHistone/wgEncodeBroadHistoneCd20ro01794H4k20me1Pk.broadPeak.gz
Dnd41	CTCF	Broad	None	GSM1003464	http://hgdownload.cse.ucsc.edu/goldenPath/hg19/encodeDCC/wgEncodeBroadHistone/wgEncodeBroadHistoneDnd41CtcfPk.broadPeak.gz
Dnd41	EZH2_(39875)	Broad	None	GSM1003522	http://hgdownload.cse.ucsc.edu/goldenPath/hg19/encodeDCC/wgEncodeBroadHistone/wgEncodeBroadHistoneDnd41Ezh239875Pk.broadPeak.gz
Dnd41	H2A.Z	Broad	None	GSM1003465	http://hgdownload.cse.ucsc.edu/goldenPath/hg19/encodeDCC/wgEncodeBroadHistone/wgEncodeBroadHistoneDnd41H2azPk.broadPeak.gz
Dnd41	H3K27ac	Broad	None	GSM1003462	http://hgdownload.cse.ucsc.edu/goldenPath/hg19/encodeDCC/wgEncodeBroadHistone/wgEncodeBroadHistoneDnd41H3k27acPk.broadPeak.gz
Dnd41	H3K27me3	Broad	None	GSM1003521	http://hgdownload.cse.ucsc.edu/goldenPath/hg19/encodeDCC/wgEncodeBroadHistone/wgEncodeBroadHistoneDnd41H3k27me3Pk.broadPeak.gz
Dnd41	H3K36me3	Broad	None	GSM1003463	http://hgdownload.cse.ucsc.edu/goldenPath/hg19/encodeDCC/wgEncodeBroadHistone/wgEncodeBroadHistoneDnd41H3k36me3Pk.broadPeak.gz
Dnd41	H3K4me1	Broad	None	GSM1003460	http://hgdownload.cse.ucsc.edu/goldenPath/hg19/encodeDCC/wgEncodeBroadHistone/wgEncodeBroadHistoneDnd41H3k04me1Pk.broadPeak.gz
Dnd41	H3K4me2	Broad	None	GSM1003461	http://hgdownload.cse.ucsc.edu/goldenPath/hg19/encodeDCC/wgEncodeBroadHistone/wgEncodeBroadHistoneDnd41H3k04me2Pk.broadPeak.gz
Dnd41	H3K4me3	Broad	None	GSM1003468	http://hgdownload.cse.ucsc.edu/goldenPath/hg19/encodeDCC/wgEncodeBroadHistone/wgEncodeBroadHistoneDnd41H3k04me3Pk.broadPeak.gz
Dnd41	H3K79me2	Broad	None	GSM1003469	http://hgdownload.cse.ucsc.edu/goldenPath/hg19/encodeDCC/wgEncodeBroadHistone/wgEncodeBroadHistoneDnd41H3k79me2Pk.broadPeak.gz
Dnd41	H3K9ac	Broad	None	GSM1003552	http://hgdownload.cse.ucsc.edu/goldenPath/hg19/encodeDCC/wgEncodeBroadHistone/wgEncodeBroadHistoneDnd41H3k09acPk.broadPeak.gz
Dnd41	H3K9me3	Broad	None	GSM1003551	http://hgdownload.cse.ucsc.edu/goldenPath/hg19/encodeDCC/wgEncodeBroadHistone/wgEncodeBroadHistoneDnd41H3k09me3Pk.broadPeak.gz
Dnd41	H4K20me1	Broad	None	GSM1003481	http://hgdownload.cse.ucsc.edu/goldenPath/hg19/encodeDCC/wgEncodeBroadHistone/wgEncodeBroadHistoneDnd41H4k20me1Pk.broadPeak.gz
GM06990	H3K27me3	UW	None	GSM945205	http://hgdownload.cse.ucsc.edu/goldenPath/hg19/encodeDCC/wgEncodeUwHistone/wgEncodeUwHistoneGm06990H3k27me3StdPkRep1.narrowPeak.gz
GM06990	H3K27me3	UW	None	GSM945205	http://hgdownload.cse.ucsc.edu/goldenPath/hg19/encodeDCC/wgEncodeUwHistone/wgEncodeUwHistoneGm06990H3k27me3StdHotspotsRep1.broadPeak.gz
GM06990	H3K36me3	UW	None	GSM945213	http://hgdownload.cse.ucsc.edu/goldenPath/hg19/encodeDCC/wgEncodeUwHistone/wgEncodeUwHistoneGm06990H3k36me3StdPkRep1.narrowPeak.gz
GM06990	H3K36me3	UW	None	GSM945213	http://hgdownload.cse.ucsc.edu/goldenPath/hg19/encodeDCC/wgEncodeUwHistone/wgEncodeUwHistoneGm06990H3k36me3StdHotspotsRep1.broadPeak.gz
GM06990	H3K4me3	UW	None	GSM945179	http://hgdownload.cse.ucsc.edu/goldenPath/hg19/encodeDCC/wgEncodeUwHistone/wgEncodeUwHistoneGm06990H3k4me3StdPkRep1.narrowPeak.gz
GM06990	H3K4me3	UW	None	GSM945179	http://hgdownload.cse.ucsc.edu/goldenPath/hg19/encodeDCC/wgEncodeUwHistone/wgEncodeUwHistoneGm06990H3k4me3StdHotspotsRep1.broadPeak.gz
GM12864	H3K4me3	UW	None	GSM945296	http://hgdownload.cse.ucsc.edu/goldenPath/hg19/encodeDCC/wgEncodeUwHistone/wgEncodeUwHistoneGm12864H3k04me3StdPkRep1.narrowPeak.gz
GM12864	H3K4me3	UW	None	GSM945296	http://hgdownload.cse.ucsc.edu/goldenPath/hg19/encodeDCC/wgEncodeUwHistone/wgEncodeUwHistoneGm12864H3k04me3StdHotspotsRep1.broadPeak.gz
GM12865	H3K4me3	UW	None	GSM945295	http://hgdownload.cse.ucsc.edu/goldenPath/hg19/encodeDCC/wgEncodeUwHistone/wgEncodeUwHistoneGm12865H3k04me3StdPkRep1.narrowPeak.gz
GM12865	H3K4me3	UW	None	GSM945295	http://hgdownload.cse.ucsc.edu/goldenPath/hg19/encodeDCC/wgEncodeUwHistone/wgEncodeUwHistoneGm12865H3k04me3StdHotspotsRep1.broadPeak.gz
GM12866	H3K4me3	UW	None	GSM945220	http://hgdownload.cse.ucsc.edu/goldenPath/hg19/encodeDCC/wgEncodeUwHistone/wgEncodeUwHistoneGm12866H3k04me3StdPkRep1.narrowPeak.gz
GM12866	H3K4me3	UW	None	GSM945220	http://hgdownload.cse.ucsc.edu/goldenPath/hg19/encodeDCC/wgEncodeUwHistone/wgEncodeUwHistoneGm12866H3k04me3StdHotspotsRep1.broadPeak.gz
GM12875	H3K4me3	UW	None	GSM945221	http://hgdownload.cse.ucsc.edu/goldenPath/hg19/encodeDCC/wgEncodeUwHistone/wgEncodeUwHistoneGm12875H3k04me3StdPkRep1.narrowPeak.gz
GM12875	H3K4me3	UW	None	GSM945221	http://hgdownload.cse.ucsc.edu/goldenPath/hg19/encodeDCC/wgEncodeUwHistone/wgEncodeUwHistoneGm12875H3k04me3StdHotspotsRep1.broadPeak.gz
GM12878	CTCF	Broad	None	GSM733752	http://hgdownload.cse.ucsc.edu/goldenPath/hg19/encodeDCC/wgEncodeBroadHistone/wgEncodeBroadHistoneGm12878CtcfStdPk.broadPeak.gz
GM12878	EZH2_(39875)	Broad	None	GSM1003498	http://hgdownload.cse.ucsc.edu/goldenPath/hg19/encodeDCC/wgEncodeBroadHistone/wgEncodeBroadHistoneGm12878Ezh239875Pk.broadPeak.gz
GM12878	H2A.Z	Broad	None	GSM733767	http://hgdownload.cse.ucsc.edu/goldenPath/hg19/encodeDCC/wgEncodeBroadHistone/wgEncodeBroadHistoneGm12878H2azStdPk.broadPeak.gz
GM12878	H3K27ac	Broad	None	GSM733771	http://hgdownload.cse.ucsc.edu/goldenPath/hg19/encodeDCC/wgEncodeBroadHistone/wgEncodeBroadHistoneGm12878H3k27acStdPk.broadPeak.gz
GM12878	H3K27me3	Broad	None	GSM733758	http://hgdownload.cse.ucsc.edu/goldenPath/hg19/encodeDCC/wgEncodeBroadHistone/wgEncodeBroadHistoneGm12878H3k27me3StdPkV2.broadPeak.gz
GM12878	H3K27me3	UW	None	GSM945196	http://hgdownload.cse.ucsc.edu/goldenPath/hg19/encodeDCC/wgEncodeUwHistone/wgEncodeUwHistoneGm12878H3k27me3StdPkRep1.narrowPeak.gz
GM12878	H3K27me3	UW	None	GSM945196	http://hgdownload.cse.ucsc.edu/goldenPath/hg19/encodeDCC/wgEncodeUwHistone/wgEncodeUwHistoneGm12878H3k27me3StdHotspotsRep1.broadPeak.gz
GM12878	H3K36me3	Broad	None	GSM733679	http://hgdownload.cse.ucsc.edu/goldenPath/hg19/encodeDCC/wgEncodeBroadHistone/wgEncodeBroadHistoneGm12878H3k36me3StdPk.broadPeak.gz
GM12878	H3K36me3	UW	None	GSM945212	http://hgdownload.cse.ucsc.edu/goldenPath/hg19/encodeDCC/wgEncodeUwHistone/wgEncodeUwHistoneGm12878H3k36me3StdPkRep1.narrowPeak.gz
GM12878	H3K36me3	UW	None	GSM945212	http://hgdownload.cse.ucsc.edu/goldenPath/hg19/encodeDCC/wgEncodeUwHistone/wgEncodeUwHistoneGm12878H3k36me3StdHotspotsRep1.broadPeak.gz
GM12878	H3K4me1	Broad	None	GSM733772	http://hgdownload.cse.ucsc.edu/goldenPath/hg19/encodeDCC/wgEncodeBroadHistone/wgEncodeBroadHistoneGm12878H3k04me1StdPkV2.broadPeak.gz
GM12878	H3K4me2	Broad	None	GSM733769	http://hgdownload.cse.ucsc.edu/goldenPath/hg19/encodeDCC/wgEncodeBroadHistone/wgEncodeBroadHistoneGm12878H3k4me2StdPk.broadPeak.gz
GM12878	H3K4me3	Broad	None	GSM733708	http://hgdownload.cse.ucsc.edu/goldenPath/hg19/encodeDCC/wgEncodeBroadHistone/wgEncodeBroadHistoneGm12878H3k04me3StdPkV2.broadPeak.gz
GM12878	H3K4me3	UW	None	GSM945188	http://hgdownload.cse.ucsc.edu/goldenPath/hg19/encodeDCC/wgEncodeUwHistone/wgEncodeUwHistoneGm12878H3k4me3StdPkRep1.narrowPeak.gz
GM12878	H3K4me3	UW	None	GSM945188	http://hgdownload.cse.ucsc.edu/goldenPath/hg19/encodeDCC/wgEncodeUwHistone/wgEncodeUwHistoneGm12878H3k4me3StdHotspotsRep1.broadPeak.gz
GM12878	H3K79me2	Broad	None	GSM733736	http://hgdownload.cse.ucsc.edu/goldenPath/hg19/encodeDCC/wgEncodeBroadHistone/wgEncodeBroadHistoneGm12878H3k79me2StdPk.broadPeak.gz
GM12878	H3K9ac	Broad	None	GSM733677	http://hgdownload.cse.ucsc.edu/goldenPath/hg19/encodeDCC/wgEncodeBroadHistone/wgEncodeBroadHistoneGm12878H3k9acStdPk.broadPeak.gz
GM12878	H3K9me3	Broad	None	GSM733664	http://hgdownload.cse.ucsc.edu/goldenPath/hg19/encodeDCC/wgEncodeBroadHistone/wgEncodeBroadHistoneGm12878H3k9me3StdPk.broadPeak.gz
GM12878	H4K20me1	Broad	None	GSM733642	http://hgdownload.cse.ucsc.edu/goldenPath/hg19/encodeDCC/wgEncodeBroadHistone/wgEncodeBroadHistoneGm12878H4k20me1StdPk.broadPeak.gz
H1-hESC	CHD1_(A301-218A)	Broad	None	GSM1003444	http://hgdownload.cse.ucsc.edu/goldenPath/hg19/encodeDCC/wgEncodeBroadHistone/wgEncodeBroadHistoneH1hescChd1a301218aStdPk.broadPeak.gz
H1-hESC	CHD7_(A301-223A-1)	Broad	None	GSM1003473	http://hgdownload.cse.ucsc.edu/goldenPath/hg19/encodeDCC/wgEncodeBroadHistone/wgEncodeBroadHistoneH1hescChd7a301223a1Pk.broadPeak.gz
H1-hESC	CTCF	Broad	None	GSM733672	http://hgdownload.cse.ucsc.edu/goldenPath/hg19/encodeDCC/wgEncodeBroadHistone/wgEncodeBroadHistoneH1hescCtcfStdPk.broadPeak.gz
H1-hESC	EZH2_(39875)	Broad	None	GSM1003524	http://hgdownload.cse.ucsc.edu/goldenPath/hg19/encodeDCC/wgEncodeBroadHistone/wgEncodeBroadHistoneH1hescEzh239875Pk.broadPeak.gz
H1-hESC	H2A.Z	Broad	None	GSM1003579	http://hgdownload.cse.ucsc.edu/goldenPath/hg19/encodeDCC/wgEncodeBroadHistone/wgEncodeBroadHistoneH1hescH2azStdPk.broadPeak.gz
H1-hESC	H3K27ac	Broad	None	GSM733718	http://hgdownload.cse.ucsc.edu/goldenPath/hg19/encodeDCC/wgEncodeBroadHistone/wgEncodeBroadHistoneH1hescH3k27acStdPk.broadPeak.gz
H1-hESC	H3K27me3	Broad	None	GSM733748	http://hgdownload.cse.ucsc.edu/goldenPath/hg19/encodeDCC/wgEncodeBroadHistone/wgEncodeBroadHistoneH1hescH3k27me3StdPk.broadPeak.gz
H1-hESC	H3K36me3	Broad	None	GSM733725	http://hgdownload.cse.ucsc.edu/goldenPath/hg19/encodeDCC/wgEncodeBroadHistone/wgEncodeBroadHistoneH1hescH3k36me3StdPk.broadPeak.gz
H1-hESC	H3K4me1	Broad	None	GSM733782	http://hgdownload.cse.ucsc.edu/goldenPath/hg19/encodeDCC/wgEncodeBroadHistone/wgEncodeBroadHistoneH1hescH3k4me1StdPk.broadPeak.gz
H1-hESC	H3K4me2	Broad	None	GSM733670	http://hgdownload.cse.ucsc.edu/goldenPath/hg19/encodeDCC/wgEncodeBroadHistone/wgEncodeBroadHistoneH1hescH3k4me2StdPk.broadPeak.gz
H1-hESC	H3K4me3	Broad	None	GSM733657	http://hgdownload.cse.ucsc.edu/goldenPath/hg19/encodeDCC/wgEncodeBroadHistone/wgEncodeBroadHistoneH1hescH3k4me3StdPk.broadPeak.gz
H1-hESC	H3K79me2	Broad	None	GSM1003547	http://hgdownload.cse.ucsc.edu/goldenPath/hg19/encodeDCC/wgEncodeBroadHistone/wgEncodeBroadHistoneH1hescH3k79me2StdPk.broadPeak.gz
H1-hESC	H3K9ac	Broad	None	GSM733773	http://hgdownload.cse.ucsc.edu/goldenPath/hg19/encodeDCC/wgEncodeBroadHistone/wgEncodeBroadHistoneH1hescH3k9acStdPk.broadPeak.gz
H1-hESC	H3K9me3	Broad	None	GSM1003585	http://hgdownload.cse.ucsc.edu/goldenPath/hg19/encodeDCC/wgEncodeBroadHistone/wgEncodeBroadHistoneH1hescH3k09me3StdPk.broadPeak.gz
H1-hESC	H4K20me1	Broad	None	GSM733687	http://hgdownload.cse.ucsc.edu/goldenPath/hg19/encodeDCC/wgEncodeBroadHistone/wgEncodeBroadHistoneH1hescH4k20me1StdPk.broadPeak.gz
H1-hESC	HDAC2_(A300-705A)	Broad	None	GSM1003472	http://hgdownload.cse.ucsc.edu/goldenPath/hg19/encodeDCC/wgEncodeBroadHistone/wgEncodeBroadHistoneH1hescHdac2a300705aPk.broadPeak.gz
H1-hESC	HDAC6_(A301-341A)	Broad	None	GSM1003571	http://hgdownload.cse.ucsc.edu/goldenPath/hg19/encodeDCC/wgEncodeBroadHistone/wgEncodeBroadHistoneH1hescHdac6a301341aPk.broadPeak.gz
H1-hESC	JARID1A_(ab26049)	Broad	None	GSM1003446	http://hgdownload.cse.ucsc.edu/goldenPath/hg19/encodeDCC/wgEncodeBroadHistone/wgEncodeBroadHistoneH1hescJarid1aab26049StdPk.broadPeak.gz
H1-hESC	JMJD2A_(A300-861A-1)	Broad	None	GSM1003479	http://hgdownload.cse.ucsc.edu/goldenPath/hg19/encodeDCC/wgEncodeBroadHistone/wgEncodeBroadHistoneH1hescJmjd2aa300861a1Pk.broadPeak.gz
H1-hESC	P300_KAT3B	Broad	None	GSM1003513	http://hgdownload.cse.ucsc.edu/goldenPath/hg19/encodeDCC/wgEncodeBroadHistone/wgEncodeBroadHistoneH1hescP300kat3bPk.broadPeak.gz
H1-hESC	PHF8_(A301-772A)	Broad	None	GSM1003509	http://hgdownload.cse.ucsc.edu/goldenPath/hg19/encodeDCC/wgEncodeBroadHistone/wgEncodeBroadHistoneH1hescPhf8a301772aPk.broadPeak.gz
H1-hESC	PLU1	Broad	None	GSM1003457	http://hgdownload.cse.ucsc.edu/goldenPath/hg19/encodeDCC/wgEncodeBroadHistone/wgEncodeBroadHistoneH1hescPlu1Pk.broadPeak.gz
H1-hESC	RBBP5_(A300-109A)	Broad	None	GSM1003584	http://hgdownload.cse.ucsc.edu/goldenPath/hg19/encodeDCC/wgEncodeBroadHistone/wgEncodeBroadHistoneH1hescRbbp5a300109aStdPk.broadPeak.gz
H1-hESC	SAP30_(39731)	Broad	None	GSM1003572	http://hgdownload.cse.ucsc.edu/goldenPath/hg19/encodeDCC/wgEncodeBroadHistone/wgEncodeBroadHistoneH1hescSap3039731Pk.broadPeak.gz
H1-hESC	SIRT6	Broad	None	GSM1003451	http://hgdownload.cse.ucsc.edu/goldenPath/hg19/encodeDCC/wgEncodeBroadHistone/wgEncodeBroadHistoneH1hescSirt6Pk.broadPeak.gz
H1-hESC	SUZ12_(05-1317)	Broad	None	GSM1003573	http://hgdownload.cse.ucsc.edu/goldenPath/hg19/encodeDCC/wgEncodeBroadHistone/wgEncodeBroadHistoneH1hescSuz12051317Pk.broadPeak.gz
H7-hESC	H3K27me3	UW	diffProtA_14d	GSM945320	http://hgdownload.cse.ucsc.edu/goldenPath/hg19/encodeDCC/wgEncodeUwHistone/wgEncodeUwHistoneH7esH3k27me3StdDiffa14dPkRep1.narrowPeak.gz
H7-hESC	H3K27me3	UW	diffProtA_14d	GSM945320	http://hgdownload.cse.ucsc.edu/goldenPath/hg19/encodeDCC/wgEncodeUwHistone/wgEncodeUwHistoneH7esH3k27me3StdDiffa14dHotspotsRep1.broadPeak.gz
H7-hESC	H3K27me3	UW	diffProtA_2d	GSM945325	http://hgdownload.cse.ucsc.edu/goldenPath/hg19/encodeDCC/wgEncodeUwHistone/wgEncodeUwHistoneH7esH3k27me3StdDiffa2dPkRep1.narrowPeak.gz
H7-hESC	H3K27me3	UW	diffProtA_2d	GSM945325	http://hgdownload.cse.ucsc.edu/goldenPath/hg19/encodeDCC/wgEncodeUwHistone/wgEncodeUwHistoneH7esH3k27me3StdDiffa2dHotspotsRep1.broadPeak.gz
H7-hESC	H3K27me3	UW	diffProtA_5d	GSM945326	http://hgdownload.cse.ucsc.edu/goldenPath/hg19/encodeDCC/wgEncodeUwHistone/wgEncodeUwHistoneH7esH3k27me3StdDiffa5dPkRep1.narrowPeak.gz
H7-hESC	H3K27me3	UW	diffProtA_5d	GSM945326	http://hgdownload.cse.ucsc.edu/goldenPath/hg19/encodeDCC/wgEncodeUwHistone/wgEncodeUwHistoneH7esH3k27me3StdDiffa5dHotspotsRep1.broadPeak.gz
H7-hESC	H3K27me3	UW	diffProtA_9d	GSM945323	http://hgdownload.cse.ucsc.edu/goldenPath/hg19/encodeDCC/wgEncodeUwHistone/wgEncodeUwHistoneH7esH3k27me3StdDiffa9dPkRep1.narrowPeak.gz
H7-hESC	H3K27me3	UW	diffProtA_9d	GSM945323	http://hgdownload.cse.ucsc.edu/goldenPath/hg19/encodeDCC/wgEncodeUwHistone/wgEncodeUwHistoneH7esH3k27me3StdDiffa9dHotspotsRep1.broadPeak.gz
H7-hESC	H3K27me3	UW	None	GSM945183	http://hgdownload.cse.ucsc.edu/goldenPath/hg19/encodeDCC/wgEncodeUwHistone/wgEncodeUwHistoneH7esH3k27me3StdPkRep1.narrowPeak.gz
H7-hESC	H3K27me3	UW	None	GSM945183	http://hgdownload.cse.ucsc.edu/goldenPath/hg19/encodeDCC/wgEncodeUwHistone/wgEncodeUwHistoneH7esH3k27me3StdHotspotsRep1.broadPeak.gz
H7-hESC	H3K36me3	UW	diffProtA_14d	GSM945324	http://hgdownload.cse.ucsc.edu/goldenPath/hg19/encodeDCC/wgEncodeUwHistone/wgEncodeUwHistoneH7esH3k36me3StdDiffa14dPkRep1.narrowPeak.gz
H7-hESC	H3K36me3	UW	diffProtA_14d	GSM945324	http://hgdownload.cse.ucsc.edu/goldenPath/hg19/encodeDCC/wgEncodeUwHistone/wgEncodeUwHistoneH7esH3k36me3StdDiffa14dHotspotsRep1.broadPeak.gz
H7-hESC	H3K36me3	UW	diffProtA_2d	GSM945315	http://hgdownload.cse.ucsc.edu/goldenPath/hg19/encodeDCC/wgEncodeUwHistone/wgEncodeUwHistoneH7esH3k36me3StdDiffa2dPkRep1.narrowPeak.gz
H7-hESC	H3K36me3	UW	diffProtA_2d	GSM945315	http://hgdownload.cse.ucsc.edu/goldenPath/hg19/encodeDCC/wgEncodeUwHistone/wgEncodeUwHistoneH7esH3k36me3StdDiffa2dHotspotsRep1.broadPeak.gz
H7-hESC	H3K36me3	UW	diffProtA_5d	GSM945316	http://hgdownload.cse.ucsc.edu/goldenPath/hg19/encodeDCC/wgEncodeUwHistone/wgEncodeUwHistoneH7esH3k36me3StdDiffa5dPkRep1.narrowPeak.gz
H7-hESC	H3K36me3	UW	diffProtA_5d	GSM945316	http://hgdownload.cse.ucsc.edu/goldenPath/hg19/encodeDCC/wgEncodeUwHistone/wgEncodeUwHistoneH7esH3k36me3StdDiffa5dHotspotsRep1.broadPeak.gz
H7-hESC	H3K36me3	UW	diffProtA_9d	GSM945192	http://hgdownload.cse.ucsc.edu/goldenPath/hg19/encodeDCC/wgEncodeUwHistone/wgEncodeUwHistoneH7esH3k36me3StdDiffa9dPkRep1.narrowPeak.gz
H7-hESC	H3K36me3	UW	diffProtA_9d	GSM945192	http://hgdownload.cse.ucsc.edu/goldenPath/hg19/encodeDCC/wgEncodeUwHistone/wgEncodeUwHistoneH7esH3k36me3StdDiffa9dHotspotsRep1.broadPeak.gz
H7-hESC	H3K36me3	UW	None	GSM945184	http://hgdownload.cse.ucsc.edu/goldenPath/hg19/encodeDCC/wgEncodeUwHistone/wgEncodeUwHistoneH7esH3k36me3StdPkRep1.narrowPeak.gz
H7-hESC	H3K36me3	UW	None	GSM945184	http://hgdownload.cse.ucsc.edu/goldenPath/hg19/encodeDCC/wgEncodeUwHistone/wgEncodeUwHistoneH7esH3k36me3StdHotspotsRep1.broadPeak.gz
H7-hESC	H3K4me3	UW	diffProtA_14d	GSM945321	http://hgdownload.cse.ucsc.edu/goldenPath/hg19/encodeDCC/wgEncodeUwHistone/wgEncodeUwHistoneH7esH3k04me3StdDiffa14dPkRep1.narrowPeak.gz
H7-hESC	H3K4me3	UW	diffProtA_14d	GSM945321	http://hgdownload.cse.ucsc.edu/goldenPath/hg19/encodeDCC/wgEncodeUwHistone/wgEncodeUwHistoneH7esH3k04me3StdDiffa14dHotspotsRep1.broadPeak.gz
H7-hESC	H3K4me3	UW	diffProtA_2d	GSM945191	http://hgdownload.cse.ucsc.edu/goldenPath/hg19/encodeDCC/wgEncodeUwHistone/wgEncodeUwHistoneH7esH3k04me3StdDiffa2dPkRep1.narrowPeak.gz
H7-hESC	H3K4me3	UW	diffProtA_2d	GSM945191	http://hgdownload.cse.ucsc.edu/goldenPath/hg19/encodeDCC/wgEncodeUwHistone/wgEncodeUwHistoneH7esH3k04me3StdDiffa2dHotspotsRep1.broadPeak.gz
H7-hESC	H3K4me3	UW	diffProtA_5d	GSM945322	http://hgdownload.cse.ucsc.edu/goldenPath/hg19/encodeDCC/wgEncodeUwHistone/wgEncodeUwHistoneH7esH3k04me3StdDiffa5dPkRep1.narrowPeak.gz
H7-hESC	H3K4me3	UW	diffProtA_5d	GSM945322	http://hgdownload.cse.ucsc.edu/goldenPath/hg19/encodeDCC/wgEncodeUwHistone/wgEncodeUwHistoneH7esH3k04me3StdDiffa5dHotspotsRep1.broadPeak.gz
H7-hESC	H3K4me3	UW	diffProtA_9d	GSM945190	http://hgdownload.cse.ucsc.edu/goldenPath/hg19/encodeDCC/wgEncodeUwHistone/wgEncodeUwHistoneH7esH3k04me3StdDiffa9dPkRep1.narrowPeak.gz
H7-hESC	H3K4me3	UW	diffProtA_9d	GSM945190	http://hgdownload.cse.ucsc.edu/goldenPath/hg19/encodeDCC/wgEncodeUwHistone/wgEncodeUwHistoneH7esH3k04me3StdDiffa9dHotspotsRep1.broadPeak.gz
H7-hESC	H3K4me3	UW	None	GSM945185	http://hgdownload.cse.ucsc.edu/goldenPath/hg19/encodeDCC/wgEncodeUwHistone/wgEncodeUwHistoneH7esH3k4me3StdPkRep1.narrowPeak.gz
H7-hESC	H3K4me3	UW	None	GSM945185	http://hgdownload.cse.ucsc.edu/goldenPath/hg19/encodeDCC/wgEncodeUwHistone/wgEncodeUwHistoneH7esH3k4me3StdHotspotsRep1.broadPeak.gz
HA-sp	H3K4me3	UW	None	GSM945249	http://hgdownload.cse.ucsc.edu/goldenPath/hg19/encodeDCC/wgEncodeUwHistone/wgEncodeUwHistoneHaspH3k4me3StdPkRep1.narrowPeak.gz
HA-sp	H3K4me3	UW	None	GSM945249	http://hgdownload.cse.ucsc.edu/goldenPath/hg19/encodeDCC/wgEncodeUwHistone/wgEncodeUwHistoneHaspH3k4me3StdHotspotsRep1.broadPeak.gz
HAc	H3K4me3	UW	None	GSM945242	http://hgdownload.cse.ucsc.edu/goldenPath/hg19/encodeDCC/wgEncodeUwHistone/wgEncodeUwHistoneHacH3k04me3StdPkRep1.narrowPeak.gz
HAc	H3K4me3	UW	None	GSM945242	http://hgdownload.cse.ucsc.edu/goldenPath/hg19/encodeDCC/wgEncodeUwHistone/wgEncodeUwHistoneHacH3k04me3StdHotspotsRep1.broadPeak.gz
HBMEC	H3K4me3	UW	None	GSM945163	http://hgdownload.cse.ucsc.edu/goldenPath/hg19/encodeDCC/wgEncodeUwHistone/wgEncodeUwHistoneHbmecH3k4me3StdPkRep1.narrowPeak.gz
HBMEC	H3K4me3	UW	None	GSM945163	http://hgdownload.cse.ucsc.edu/goldenPath/hg19/encodeDCC/wgEncodeUwHistone/wgEncodeUwHistoneHbmecH3k4me3StdHotspotsRep1.broadPeak.gz
HCF	H3K4me3	UW	None	GSM945312	http://hgdownload.cse.ucsc.edu/goldenPath/hg19/encodeDCC/wgEncodeUwHistone/wgEncodeUwHistoneHcfH3k4me3StdPkRep1.narrowPeak.gz
HCF	H3K4me3	UW	None	GSM945312	http://hgdownload.cse.ucsc.edu/goldenPath/hg19/encodeDCC/wgEncodeUwHistone/wgEncodeUwHistoneHcfH3k4me3StdHotspotsRep1.broadPeak.gz
HCFaa	H3K4me3	UW	None	GSM945310	http://hgdownload.cse.ucsc.edu/goldenPath/hg19/encodeDCC/wgEncodeUwHistone/wgEncodeUwHistoneHcfaaH3k4me3StdPkRep1.narrowPeak.gz
HCFaa	H3K4me3	UW	None	GSM945310	http://hgdownload.cse.ucsc.edu/goldenPath/hg19/encodeDCC/wgEncodeUwHistone/wgEncodeUwHistoneHcfaaH3k4me3StdHotspotsRep1.broadPeak.gz
HCM	H3K4me3	UW	None	GSM945308	http://hgdownload.cse.ucsc.edu/goldenPath/hg19/encodeDCC/wgEncodeUwHistone/wgEncodeUwHistoneHcmH3k4me3StdPkRep1.narrowPeak.gz
HCM	H3K4me3	UW	None	GSM945308	http://hgdownload.cse.ucsc.edu/goldenPath/hg19/encodeDCC/wgEncodeUwHistone/wgEncodeUwHistoneHcmH3k4me3StdHotspotsRep1.broadPeak.gz
HCPEpiC	H3K4me3	UW	None	GSM945306	http://hgdownload.cse.ucsc.edu/goldenPath/hg19/encodeDCC/wgEncodeUwHistone/wgEncodeUwHistoneHcpeH3k4me3StdPkRep1.narrowPeak.gz
HCPEpiC	H3K4me3	UW	None	GSM945306	http://hgdownload.cse.ucsc.edu/goldenPath/hg19/encodeDCC/wgEncodeUwHistone/wgEncodeUwHistoneHcpeH3k4me3StdHotspotsRep1.broadPeak.gz
HCT-116	H3K27ac	USC	None	GSM945853	http://hgdownload.cse.ucsc.edu/goldenPath/hg19/encodeDCC/wgEncodeSydhHistone/wgEncodeSydhHistoneHct116H3k27acUcdPk.narrowPeak.gz
HCT-116	H3K4me1	USC	None	GSM945858	http://hgdownload.cse.ucsc.edu/goldenPath/hg19/encodeDCC/wgEncodeSydhHistone/wgEncodeSydhHistoneHct116H3k04me1UcdPk.narrowPeak.gz
HCT-116	H3K4me3	UW	None	GSM945304	http://hgdownload.cse.ucsc.edu/goldenPath/hg19/encodeDCC/wgEncodeUwHistone/wgEncodeUwHistoneHct116H3k4me3StdPkRep1.narrowPeak.gz
HCT-116	H3K4me3	UW	None	GSM945304	http://hgdownload.cse.ucsc.edu/goldenPath/hg19/encodeDCC/wgEncodeUwHistone/wgEncodeUwHistoneHct116H3k4me3StdHotspotsRep1.broadPeak.gz
HEEpiC	H3K4me3	UW	None	GSM945286	http://hgdownload.cse.ucsc.edu/goldenPath/hg19/encodeDCC/wgEncodeUwHistone/wgEncodeUwHistoneHeeH3k4me3StdPkRep1.narrowPeak.gz
HEEpiC	H3K4me3	UW	None	GSM945286	http://hgdownload.cse.ucsc.edu/goldenPath/hg19/encodeDCC/wgEncodeUwHistone/wgEncodeUwHistoneHeeH3k4me3StdHotspotsRep1.broadPeak.gz
HEK293	H3K4me3	UW	None	GSM945288	http://hgdownload.cse.ucsc.edu/goldenPath/hg19/encodeDCC/wgEncodeUwHistone/wgEncodeUwHistoneHek293H3k4me3StdPkRep1.narrowPeak.gz
HEK293	H3K4me3	UW	None	GSM945288	http://hgdownload.cse.ucsc.edu/goldenPath/hg19/encodeDCC/wgEncodeUwHistone/wgEncodeUwHistoneHek293H3k4me3StdHotspotsRep1.broadPeak.gz
HeLa-S3	CTCF	Broad	None	GSM733785	http://hgdownload.cse.ucsc.edu/goldenPath/hg19/encodeDCC/wgEncodeBroadHistone/wgEncodeBroadHistoneHelas3CtcfStdPk.broadPeak.gz
HeLa-S3	EZH2_(39875)	Broad	None	GSM1003520	http://hgdownload.cse.ucsc.edu/goldenPath/hg19/encodeDCC/wgEncodeBroadHistone/wgEncodeBroadHistoneHelas3Ezh239875Pk.broadPeak.gz
HeLa-S3	H2A.Z	Broad	None	GSM1003483	http://hgdownload.cse.ucsc.edu/goldenPath/hg19/encodeDCC/wgEncodeBroadHistone/wgEncodeBroadHistoneHelas3H2azPk.broadPeak.gz
HeLa-S3	H3K27ac	Broad	None	GSM733684	http://hgdownload.cse.ucsc.edu/goldenPath/hg19/encodeDCC/wgEncodeBroadHistone/wgEncodeBroadHistoneHelas3H3k27acStdPk.broadPeak.gz
HeLa-S3	H3K27me3	Broad	None	GSM733696	http://hgdownload.cse.ucsc.edu/goldenPath/hg19/encodeDCC/wgEncodeBroadHistone/wgEncodeBroadHistoneHelas3H3k27me3StdPk.broadPeak.gz
HeLa-S3	H3K27me3	UW	None	GSM945208	http://hgdownload.cse.ucsc.edu/goldenPath/hg19/encodeDCC/wgEncodeUwHistone/wgEncodeUwHistoneHelas3H3k27me3StdPkRep1.narrowPeak.gz
HeLa-S3	H3K27me3	UW	None	GSM945208	http://hgdownload.cse.ucsc.edu/goldenPath/hg19/encodeDCC/wgEncodeUwHistone/wgEncodeUwHistoneHelas3H3k27me3StdHotspotsRep1.broadPeak.gz
HeLa-S3	H3K36me3	Broad	None	GSM733711	http://hgdownload.cse.ucsc.edu/goldenPath/hg19/encodeDCC/wgEncodeBroadHistone/wgEncodeBroadHistoneHelas3H3k36me3StdPk.broadPeak.gz
HeLa-S3	H3K36me3	UW	None	GSM945230	http://hgdownload.cse.ucsc.edu/goldenPath/hg19/encodeDCC/wgEncodeUwHistone/wgEncodeUwHistoneHelas3H3k36me3StdPkRep1.narrowPeak.gz
HeLa-S3	H3K36me3	UW	None	GSM945230	http://hgdownload.cse.ucsc.edu/goldenPath/hg19/encodeDCC/wgEncodeUwHistone/wgEncodeUwHistoneHelas3H3k36me3StdHotspotsRep1.broadPeak.gz
HeLa-S3	H3K4me1	Broad	None	GSM798322	http://hgdownload.cse.ucsc.edu/goldenPath/hg19/encodeDCC/wgEncodeBroadHistone/wgEncodeBroadHistoneHelas3H3k04me1StdPk.broadPeak.gz
HeLa-S3	H3K4me2	Broad	None	GSM733734	http://hgdownload.cse.ucsc.edu/goldenPath/hg19/encodeDCC/wgEncodeBroadHistone/wgEncodeBroadHistoneHelas3H3k4me2StdPk.broadPeak.gz
HeLa-S3	H3K4me3	Broad	None	GSM733682	http://hgdownload.cse.ucsc.edu/goldenPath/hg19/encodeDCC/wgEncodeBroadHistone/wgEncodeBroadHistoneHelas3H3k4me3StdPk.broadPeak.gz
HeLa-S3	H3K4me3	UW	None	GSM945201	http://hgdownload.cse.ucsc.edu/goldenPath/hg19/encodeDCC/wgEncodeUwHistone/wgEncodeUwHistoneHelas3H3k4me3StdPkRep1.narrowPeak.gz
HeLa-S3	H3K4me3	UW	None	GSM945201	http://hgdownload.cse.ucsc.edu/goldenPath/hg19/encodeDCC/wgEncodeUwHistone/wgEncodeUwHistoneHelas3H3k4me3StdHotspotsRep1.broadPeak.gz
HeLa-S3	H3K79me2	Broad	None	GSM733669	http://hgdownload.cse.ucsc.edu/goldenPath/hg19/encodeDCC/wgEncodeBroadHistone/wgEncodeBroadHistoneHelas3H3k79me2StdPk.broadPeak.gz
HeLa-S3	H3K9ac	Broad	None	GSM733756	http://hgdownload.cse.ucsc.edu/goldenPath/hg19/encodeDCC/wgEncodeBroadHistone/wgEncodeBroadHistoneHelas3H3k9acStdPk.broadPeak.gz
HeLa-S3	H3K9me3	Broad	None	GSM1003480	http://hgdownload.cse.ucsc.edu/goldenPath/hg19/encodeDCC/wgEncodeBroadHistone/wgEncodeBroadHistoneHelas3H3k09me3Pk.broadPeak.gz
HeLa-S3	H4K20me1	Broad	None	GSM733689	http://hgdownload.cse.ucsc.edu/goldenPath/hg19/encodeDCC/wgEncodeBroadHistone/wgEncodeBroadHistoneHelas3H4k20me1StdPk.broadPeak.gz
HepG2	CTCF	Broad	None	GSM733645	http://hgdownload.cse.ucsc.edu/goldenPath/hg19/encodeDCC/wgEncodeBroadHistone/wgEncodeBroadHistoneHepg2CtcfStdPk.broadPeak.gz
HepG2	EZH2_(39875)	Broad	None	GSM1003487	http://hgdownload.cse.ucsc.edu/goldenPath/hg19/encodeDCC/wgEncodeBroadHistone/wgEncodeBroadHistoneHepg2Ezh239875Pk.broadPeak.gz
HepG2	H2A.Z	Broad	None	GSM733774	http://hgdownload.cse.ucsc.edu/goldenPath/hg19/encodeDCC/wgEncodeBroadHistone/wgEncodeBroadHistoneHepg2H2azStdPk.broadPeak.gz
HepG2	H3K27ac	Broad	None	GSM733743	http://hgdownload.cse.ucsc.edu/goldenPath/hg19/encodeDCC/wgEncodeBroadHistone/wgEncodeBroadHistoneHepg2H3k27acStdPk.broadPeak.gz
HepG2	H3K27me3	Broad	None	GSM733754	http://hgdownload.cse.ucsc.edu/goldenPath/hg19/encodeDCC/wgEncodeBroadHistone/wgEncodeBroadHistoneHepg2H3k27me3StdPk.broadPeak.gz
HepG2	H3K27me3	UW	None	GSM945231	http://hgdownload.cse.ucsc.edu/goldenPath/hg19/encodeDCC/wgEncodeUwHistone/wgEncodeUwHistoneHepg2H3k27me3StdPkRep1.narrowPeak.gz
HepG2	H3K27me3	UW	None	GSM945231	http://hgdownload.cse.ucsc.edu/goldenPath/hg19/encodeDCC/wgEncodeUwHistone/wgEncodeUwHistoneHepg2H3k27me3StdHotspotsRep1.broadPeak.gz
HepG2	H3K36me3	Broad	None	GSM733685	http://hgdownload.cse.ucsc.edu/goldenPath/hg19/encodeDCC/wgEncodeBroadHistone/wgEncodeBroadHistoneHepg2H3k36me3StdPk.broadPeak.gz
HepG2	H3K36me3	UW	None	GSM945211	http://hgdownload.cse.ucsc.edu/goldenPath/hg19/encodeDCC/wgEncodeUwHistone/wgEncodeUwHistoneHepg2H3k36me3StdPkRep1.narrowPeak.gz
HepG2	H3K36me3	UW	None	GSM945211	http://hgdownload.cse.ucsc.edu/goldenPath/hg19/encodeDCC/wgEncodeUwHistone/wgEncodeUwHistoneHepg2H3k36me3StdHotspotsRep1.broadPeak.gz
HepG2	H3K4me1	Broad	None	GSM798321	http://hgdownload.cse.ucsc.edu/goldenPath/hg19/encodeDCC/wgEncodeBroadHistone/wgEncodeBroadHistoneHepg2H3k04me1StdPk.broadPeak.gz
HepG2	H3K4me2	Broad	None	GSM733693	http://hgdownload.cse.ucsc.edu/goldenPath/hg19/encodeDCC/wgEncodeBroadHistone/wgEncodeBroadHistoneHepg2H3k4me2StdPk.broadPeak.gz
HepG2	H3K4me3	Broad	None	GSM733737	http://hgdownload.cse.ucsc.edu/goldenPath/hg19/encodeDCC/wgEncodeBroadHistone/wgEncodeBroadHistoneHepg2H3k4me3StdPk.broadPeak.gz
HepG2	H3K4me3	UW	None	GSM945182	http://hgdownload.cse.ucsc.edu/goldenPath/hg19/encodeDCC/wgEncodeUwHistone/wgEncodeUwHistoneHepg2H3k4me3StdPkRep1.narrowPeak.gz
HepG2	H3K4me3	UW	None	GSM945182	http://hgdownload.cse.ucsc.edu/goldenPath/hg19/encodeDCC/wgEncodeUwHistone/wgEncodeUwHistoneHepg2H3k4me3StdHotspotsRep1.broadPeak.gz
HepG2	H3K79me2	Broad	None	GSM733641	http://hgdownload.cse.ucsc.edu/goldenPath/hg19/encodeDCC/wgEncodeBroadHistone/wgEncodeBroadHistoneHepg2H3k79me2StdPk.broadPeak.gz
HepG2	H3K9ac	Broad	None	GSM733638	http://hgdownload.cse.ucsc.edu/goldenPath/hg19/encodeDCC/wgEncodeBroadHistone/wgEncodeBroadHistoneHepg2H3k9acStdPk.broadPeak.gz
HepG2	H3K9me3	Broad	None	GSM1003519	http://hgdownload.cse.ucsc.edu/goldenPath/hg19/encodeDCC/wgEncodeBroadHistone/wgEncodeBroadHistoneHepg2H3k09me3Pk.broadPeak.gz
HepG2	H4K20me1	Broad	None	GSM733694	http://hgdownload.cse.ucsc.edu/goldenPath/hg19/encodeDCC/wgEncodeBroadHistone/wgEncodeBroadHistoneHepg2H4k20me1StdPk.broadPeak.gz
HFF	H3K4me3	UW	None	GSM945218	http://hgdownload.cse.ucsc.edu/goldenPath/hg19/encodeDCC/wgEncodeUwHistone/wgEncodeUwHistoneHffH3k04me3StdPkRep1.narrowPeak.gz
HFF	H3K4me3	UW	None	GSM945218	http://hgdownload.cse.ucsc.edu/goldenPath/hg19/encodeDCC/wgEncodeUwHistone/wgEncodeUwHistoneHffH3k04me3StdHotspotsRep1.broadPeak.gz
HFF-Myc	H3K4me3	UW	None	GSM945239	http://hgdownload.cse.ucsc.edu/goldenPath/hg19/encodeDCC/wgEncodeUwHistone/wgEncodeUwHistoneHffmycH3k04me3StdPkRep1.narrowPeak.gz
HFF-Myc	H3K4me3	UW	None	GSM945239	http://hgdownload.cse.ucsc.edu/goldenPath/hg19/encodeDCC/wgEncodeUwHistone/wgEncodeUwHistoneHffmycH3k04me3StdHotspotsRep1.broadPeak.gz
HL-60	H3K4me3	UW	None	GSM945222	http://hgdownload.cse.ucsc.edu/goldenPath/hg19/encodeDCC/wgEncodeUwHistone/wgEncodeUwHistoneHl60H3k4me3StdPkRep1.narrowPeak.gz
HL-60	H3K4me3	UW	None	GSM945222	http://hgdownload.cse.ucsc.edu/goldenPath/hg19/encodeDCC/wgEncodeUwHistone/wgEncodeUwHistoneHl60H3k4me3StdHotspotsRep1.broadPeak.gz
HMEC	CTCF	Broad	None	GSM733724	http://hgdownload.cse.ucsc.edu/goldenPath/hg19/encodeDCC/wgEncodeBroadHistone/wgEncodeBroadHistoneHmecCtcfStdPk.broadPeak.gz
HMEC	EZH2_(39875)	Broad	None	GSM1003501	http://hgdownload.cse.ucsc.edu/goldenPath/hg19/encodeDCC/wgEncodeBroadHistone/wgEncodeBroadHistoneHmecEzh239875Pk.broadPeak.gz
HMEC	H2A.Z	Broad	None	GSM1003500	http://hgdownload.cse.ucsc.edu/goldenPath/hg19/encodeDCC/wgEncodeBroadHistone/wgEncodeBroadHistoneHmecH2azPk.broadPeak.gz
HMEC	H3K27ac	Broad	None	GSM733660	http://hgdownload.cse.ucsc.edu/goldenPath/hg19/encodeDCC/wgEncodeBroadHistone/wgEncodeBroadHistoneHmecH3k27acStdPk.broadPeak.gz
HMEC	H3K27me3	Broad	None	GSM733722	http://hgdownload.cse.ucsc.edu/goldenPath/hg19/encodeDCC/wgEncodeBroadHistone/wgEncodeBroadHistoneHmecH3k27me3StdPk.broadPeak.gz
HMEC	H3K27me3	UW	None	GSM945277	http://hgdownload.cse.ucsc.edu/goldenPath/hg19/encodeDCC/wgEncodeUwHistone/wgEncodeUwHistoneHmecH3k27me3StdPkRep1.narrowPeak.gz
HMEC	H3K27me3	UW	None	GSM945277	http://hgdownload.cse.ucsc.edu/goldenPath/hg19/encodeDCC/wgEncodeUwHistone/wgEncodeUwHistoneHmecH3k27me3StdHotspotsRep1.broadPeak.gz
HMEC	H3K36me3	Broad	None	GSM733707	http://hgdownload.cse.ucsc.edu/goldenPath/hg19/encodeDCC/wgEncodeBroadHistone/wgEncodeBroadHistoneHmecH3k36me3StdPk.broadPeak.gz
HMEC	H3K4me1	Broad	None	GSM733705	http://hgdownload.cse.ucsc.edu/goldenPath/hg19/encodeDCC/wgEncodeBroadHistone/wgEncodeBroadHistoneHmecH3k4me1StdPk.broadPeak.gz
HMEC	H3K4me2	Broad	None	GSM733654	http://hgdownload.cse.ucsc.edu/goldenPath/hg19/encodeDCC/wgEncodeBroadHistone/wgEncodeBroadHistoneHmecH3k4me2StdPk.broadPeak.gz
HMEC	H3K4me3	Broad	None	GSM733712	http://hgdownload.cse.ucsc.edu/goldenPath/hg19/encodeDCC/wgEncodeBroadHistone/wgEncodeBroadHistoneHmecH3k4me3StdPk.broadPeak.gz
HMEC	H3K4me3	UW	None	GSM945159	http://hgdownload.cse.ucsc.edu/goldenPath/hg19/encodeDCC/wgEncodeUwHistone/wgEncodeUwHistoneHmecH3k4me3StdPkRep1.narrowPeak.gz
HMEC	H3K4me3	UW	None	GSM945159	http://hgdownload.cse.ucsc.edu/goldenPath/hg19/encodeDCC/wgEncodeUwHistone/wgEncodeUwHistoneHmecH3k4me3StdHotspotsRep1.broadPeak.gz
HMEC	H3K79me2	Broad	None	GSM1003557	http://hgdownload.cse.ucsc.edu/goldenPath/hg19/encodeDCC/wgEncodeBroadHistone/wgEncodeBroadHistoneHmecH3k79me2Pk.broadPeak.gz
HMEC	H3K9ac	Broad	None	GSM733713	http://hgdownload.cse.ucsc.edu/goldenPath/hg19/encodeDCC/wgEncodeBroadHistone/wgEncodeBroadHistoneHmecH3k9acStdPk.broadPeak.gz
HMEC	H3K9me3	Broad	None	GSM1003485	http://hgdownload.cse.ucsc.edu/goldenPath/hg19/encodeDCC/wgEncodeBroadHistone/wgEncodeBroadHistoneHmecH3k09me3Pk.broadPeak.gz
HMEC	H4K20me1	Broad	None	GSM733647	http://hgdownload.cse.ucsc.edu/goldenPath/hg19/encodeDCC/wgEncodeBroadHistone/wgEncodeBroadHistoneHmecH4k20me1StdPk.broadPeak.gz
HMF	H3K4me3	UW	None	GSM945290	http://hgdownload.cse.ucsc.edu/goldenPath/hg19/encodeDCC/wgEncodeUwHistone/wgEncodeUwHistoneHmfH3k4me3StdPkRep1.narrowPeak.gz
HMF	H3K4me3	UW	None	GSM945290	http://hgdownload.cse.ucsc.edu/goldenPath/hg19/encodeDCC/wgEncodeUwHistone/wgEncodeUwHistoneHmfH3k4me3StdHotspotsRep1.broadPeak.gz
HPAF	H3K4me3	UW	None	GSM945292	http://hgdownload.cse.ucsc.edu/goldenPath/hg19/encodeDCC/wgEncodeUwHistone/wgEncodeUwHistoneHpafH3k4me3StdPkRep1.narrowPeak.gz
HPAF	H3K4me3	UW	None	GSM945292	http://hgdownload.cse.ucsc.edu/goldenPath/hg19/encodeDCC/wgEncodeUwHistone/wgEncodeUwHistoneHpafH3k4me3StdHotspotsRep1.broadPeak.gz
HPF	H3K4me3	UW	None	GSM945284	http://hgdownload.cse.ucsc.edu/goldenPath/hg19/encodeDCC/wgEncodeUwHistone/wgEncodeUwHistoneHpfH3k4me3StdPkRep1.narrowPeak.gz
HPF	H3K4me3	UW	None	GSM945284	http://hgdownload.cse.ucsc.edu/goldenPath/hg19/encodeDCC/wgEncodeUwHistone/wgEncodeUwHistoneHpfH3k4me3StdHotspotsRep1.broadPeak.gz
HRE	H3K27me3	UW	None	GSM945160	http://hgdownload.cse.ucsc.edu/goldenPath/hg19/encodeDCC/wgEncodeUwHistone/wgEncodeUwHistoneHreH3k27me3StdPkRep1.narrowPeak.gz
HRE	H3K27me3	UW	None	GSM945160	http://hgdownload.cse.ucsc.edu/goldenPath/hg19/encodeDCC/wgEncodeUwHistone/wgEncodeUwHistoneHreH3k27me3StdHotspotsRep1.broadPeak.gz
HRE	H3K36me3	UW	None	GSM945232	http://hgdownload.cse.ucsc.edu/goldenPath/hg19/encodeDCC/wgEncodeUwHistone/wgEncodeUwHistoneHreH3k36me3StdPkRep1.narrowPeak.gz
HRE	H3K36me3	UW	None	GSM945232	http://hgdownload.cse.ucsc.edu/goldenPath/hg19/encodeDCC/wgEncodeUwHistone/wgEncodeUwHistoneHreH3k36me3StdHotspotsRep1.broadPeak.gz
HRE	H3K4me3	UW	None	GSM945276	http://hgdownload.cse.ucsc.edu/goldenPath/hg19/encodeDCC/wgEncodeUwHistone/wgEncodeUwHistoneHreH3k4me3StdPkRep1.narrowPeak.gz
HRE	H3K4me3	UW	None	GSM945276	http://hgdownload.cse.ucsc.edu/goldenPath/hg19/encodeDCC/wgEncodeUwHistone/wgEncodeUwHistoneHreH3k4me3StdHotspotsRep1.broadPeak.gz
HRPEpiC	H3K4me3	UW	None	GSM945271	http://hgdownload.cse.ucsc.edu/goldenPath/hg19/encodeDCC/wgEncodeUwHistone/wgEncodeUwHistoneHrpeH3k4me3StdPkRep1.narrowPeak.gz
HRPEpiC	H3K4me3	UW	None	GSM945271	http://hgdownload.cse.ucsc.edu/goldenPath/hg19/encodeDCC/wgEncodeUwHistone/wgEncodeUwHistoneHrpeH3k4me3StdHotspotsRep1.broadPeak.gz
HSMM	CTCF	Broad	None	GSM733762	http://hgdownload.cse.ucsc.edu/goldenPath/hg19/encodeDCC/wgEncodeBroadHistone/wgEncodeBroadHistoneHsmmCtcfStdPk.broadPeak.gz
HSMM	EZH2_(39875)	Broad	None	GSM1003484	http://hgdownload.cse.ucsc.edu/goldenPath/hg19/encodeDCC/wgEncodeBroadHistone/wgEncodeBroadHistoneHsmmEzh239875Pk.broadPeak.gz
HSMM	H2A.Z	Broad	None	GSM733760	http://hgdownload.cse.ucsc.edu/goldenPath/hg19/encodeDCC/wgEncodeBroadHistone/wgEncodeBroadHistoneHsmmH2azStdPk.broadPeak.gz
HSMM	H3K27ac	Broad	None	GSM733755	http://hgdownload.cse.ucsc.edu/goldenPath/hg19/encodeDCC/wgEncodeBroadHistone/wgEncodeBroadHistoneHsmmH3k27acStdPk.broadPeak.gz
HSMM	H3K27me3	Broad	None	GSM733667	http://hgdownload.cse.ucsc.edu/goldenPath/hg19/encodeDCC/wgEncodeBroadHistone/wgEncodeBroadHistoneHsmmH3k27me3StdPk.broadPeak.gz
HSMM	H3K36me3	Broad	None	GSM733702	http://hgdownload.cse.ucsc.edu/goldenPath/hg19/encodeDCC/wgEncodeBroadHistone/wgEncodeBroadHistoneHsmmH3k36me3StdPk.broadPeak.gz
HSMM	H3K4me1	Broad	None	GSM733761	http://hgdownload.cse.ucsc.edu/goldenPath/hg19/encodeDCC/wgEncodeBroadHistone/wgEncodeBroadHistoneHsmmH3k4me1StdPk.broadPeak.gz
HSMM	H3K4me2	Broad	None	GSM733768	http://hgdownload.cse.ucsc.edu/goldenPath/hg19/encodeDCC/wgEncodeBroadHistone/wgEncodeBroadHistoneHsmmH3k4me2StdPk.broadPeak.gz
HSMM	H3K4me3	Broad	None	GSM733637	http://hgdownload.cse.ucsc.edu/goldenPath/hg19/encodeDCC/wgEncodeBroadHistone/wgEncodeBroadHistoneHsmmH3k4me3StdPk.broadPeak.gz
HSMM	H3K79me2	Broad	None	GSM733741	http://hgdownload.cse.ucsc.edu/goldenPath/hg19/encodeDCC/wgEncodeBroadHistone/wgEncodeBroadHistoneHsmmH3k79me2StdPk.broadPeak.gz
HSMM	H3K9ac	Broad	None	GSM733775	http://hgdownload.cse.ucsc.edu/goldenPath/hg19/encodeDCC/wgEncodeBroadHistone/wgEncodeBroadHistoneHsmmH3k9acStdPk.broadPeak.gz
HSMM	H3K9me3	Broad	None	GSM733730	http://hgdownload.cse.ucsc.edu/goldenPath/hg19/encodeDCC/wgEncodeBroadHistone/wgEncodeBroadHistoneHsmmH3k9me3StdPk.broadPeak.gz
HSMM	H4K20me1	Broad	None	GSM733676	http://hgdownload.cse.ucsc.edu/goldenPath/hg19/encodeDCC/wgEncodeBroadHistone/wgEncodeBroadHistoneHsmmH4k20me1StdPk.broadPeak.gz
HSMMtube	CTCF	Broad	None	GSM733783	http://hgdownload.cse.ucsc.edu/goldenPath/hg19/encodeDCC/wgEncodeBroadHistone/wgEncodeBroadHistoneHsmmtCtcfStdPk.broadPeak.gz
HSMMtube	EZH2_(39875)	Broad	None	GSM1003523	http://hgdownload.cse.ucsc.edu/goldenPath/hg19/encodeDCC/wgEncodeBroadHistone/wgEncodeBroadHistoneHsmmtEzh239875Pk.broadPeak.gz
HSMMtube	H2A.Z	Broad	None	GSM733746	http://hgdownload.cse.ucsc.edu/goldenPath/hg19/encodeDCC/wgEncodeBroadHistone/wgEncodeBroadHistoneHsmmtH2azStdPk.broadPeak.gz
HSMMtube	H3K27ac	Broad	None	GSM733666	http://hgdownload.cse.ucsc.edu/goldenPath/hg19/encodeDCC/wgEncodeBroadHistone/wgEncodeBroadHistoneHsmmtH3k27acStdPk.broadPeak.gz
HSMMtube	H3K27me3	Broad	None	GSM1003503	http://hgdownload.cse.ucsc.edu/goldenPath/hg19/encodeDCC/wgEncodeBroadHistone/wgEncodeBroadHistoneHsmmtH3k27me3Pk.broadPeak.gz
HSMMtube	H3K36me3	Broad	None	GSM733717	http://hgdownload.cse.ucsc.edu/goldenPath/hg19/encodeDCC/wgEncodeBroadHistone/wgEncodeBroadHistoneHsmmtH3k36me3StdPk.broadPeak.gz
HSMMtube	H3K4me1	Broad	None	GSM733661	http://hgdownload.cse.ucsc.edu/goldenPath/hg19/encodeDCC/wgEncodeBroadHistone/wgEncodeBroadHistoneHsmmtH3k4me1StdPk.broadPeak.gz
HSMMtube	H3K4me2	Broad	None	GSM733700	http://hgdownload.cse.ucsc.edu/goldenPath/hg19/encodeDCC/wgEncodeBroadHistone/wgEncodeBroadHistoneHsmmtH3k4me2StdPk.broadPeak.gz
HSMMtube	H3K4me3	Broad	None	GSM733738	http://hgdownload.cse.ucsc.edu/goldenPath/hg19/encodeDCC/wgEncodeBroadHistone/wgEncodeBroadHistoneHsmmtH3k4me3StdPk.broadPeak.gz
HSMMtube	H3K79me2	Broad	None	GSM733727	http://hgdownload.cse.ucsc.edu/goldenPath/hg19/encodeDCC/wgEncodeBroadHistone/wgEncodeBroadHistoneHsmmtH3k79me2StdPk.broadPeak.gz
HSMMtube	H3K9ac	Broad	None	GSM733639	http://hgdownload.cse.ucsc.edu/goldenPath/hg19/encodeDCC/wgEncodeBroadHistone/wgEncodeBroadHistoneHsmmtH3k9acStdPk.broadPeak.gz
HSMMtube	H3K9me3	Broad	None	GSM1003482	http://hgdownload.cse.ucsc.edu/goldenPath/hg19/encodeDCC/wgEncodeBroadHistone/wgEncodeBroadHistoneHsmmtH3k09me3Pk.broadPeak.gz
HSMMtube	H4K20me1	Broad	None	GSM733644	http://hgdownload.cse.ucsc.edu/goldenPath/hg19/encodeDCC/wgEncodeBroadHistone/wgEncodeBroadHistoneHsmmtH4k20me1StdPk.broadPeak.gz
HUVEC	CTCF	Broad	None	GSM733716	http://hgdownload.cse.ucsc.edu/goldenPath/hg19/encodeDCC/wgEncodeBroadHistone/wgEncodeBroadHistoneHuvecCtcfStdPk.broadPeak.gz
HUVEC	EZH2_(39875)	Broad	None	GSM1003518	http://hgdownload.cse.ucsc.edu/goldenPath/hg19/encodeDCC/wgEncodeBroadHistone/wgEncodeBroadHistoneHuvecEzh239875Pk.broadPeak.gz
HUVEC	H2A.Z	Broad	None	GSM1003556	http://hgdownload.cse.ucsc.edu/goldenPath/hg19/encodeDCC/wgEncodeBroadHistone/wgEncodeBroadHistoneHuvecH2azPk.broadPeak.gz
HUVEC	H3K27ac	Broad	None	GSM733691	http://hgdownload.cse.ucsc.edu/goldenPath/hg19/encodeDCC/wgEncodeBroadHistone/wgEncodeBroadHistoneHuvecH3k27acStdPk.broadPeak.gz
HUVEC	H3K27me3	Broad	None	GSM733688	http://hgdownload.cse.ucsc.edu/goldenPath/hg19/encodeDCC/wgEncodeBroadHistone/wgEncodeBroadHistoneHuvecH3k27me3StdPk.broadPeak.gz
HUVEC	H3K27me3	UW	None	GSM945180	http://hgdownload.cse.ucsc.edu/goldenPath/hg19/encodeDCC/wgEncodeUwHistone/wgEncodeUwHistoneHuvecH3k27me3StdPkRep1.narrowPeak.gz
HUVEC	H3K27me3	UW	None	GSM945180	http://hgdownload.cse.ucsc.edu/goldenPath/hg19/encodeDCC/wgEncodeUwHistone/wgEncodeUwHistoneHuvecH3k27me3StdHotspotsRep1.broadPeak.gz
HUVEC	H3K36me3	Broad	None	GSM733757	http://hgdownload.cse.ucsc.edu/goldenPath/hg19/encodeDCC/wgEncodeBroadHistone/wgEncodeBroadHistoneHuvecH3k36me3StdPk.broadPeak.gz
HUVEC	H3K36me3	UW	None	GSM945233	http://hgdownload.cse.ucsc.edu/goldenPath/hg19/encodeDCC/wgEncodeUwHistone/wgEncodeUwHistoneHuvecH3k36me3StdPkRep1.narrowPeak.gz
HUVEC	H3K36me3	UW	None	GSM945233	http://hgdownload.cse.ucsc.edu/goldenPath/hg19/encodeDCC/wgEncodeUwHistone/wgEncodeUwHistoneHuvecH3k36me3StdHotspotsRep1.broadPeak.gz
HUVEC	H3K4me1	Broad	None	GSM733690	http://hgdownload.cse.ucsc.edu/goldenPath/hg19/encodeDCC/wgEncodeBroadHistone/wgEncodeBroadHistoneHuvecH3k4me1StdPk.broadPeak.gz
HUVEC	H3K4me2	Broad	None	GSM733683	http://hgdownload.cse.ucsc.edu/goldenPath/hg19/encodeDCC/wgEncodeBroadHistone/wgEncodeBroadHistoneHuvecH3k4me2StdPk.broadPeak.gz
HUVEC	H3K4me3	Broad	None	GSM733673	http://hgdownload.cse.ucsc.edu/goldenPath/hg19/encodeDCC/wgEncodeBroadHistone/wgEncodeBroadHistoneHuvecH3k4me3StdPk.broadPeak.gz
HUVEC	H3K4me3	UW	None	GSM945181	http://hgdownload.cse.ucsc.edu/goldenPath/hg19/encodeDCC/wgEncodeUwHistone/wgEncodeUwHistoneHuvecH3k4me3StdPkRep1.narrowPeak.gz
HUVEC	H3K4me3	UW	None	GSM945181	http://hgdownload.cse.ucsc.edu/goldenPath/hg19/encodeDCC/wgEncodeUwHistone/wgEncodeUwHistoneHuvecH3k4me3StdHotspotsRep1.broadPeak.gz
HUVEC	H3K79me2	Broad	None	GSM1003555	http://hgdownload.cse.ucsc.edu/goldenPath/hg19/encodeDCC/wgEncodeBroadHistone/wgEncodeBroadHistoneHuvecH3k79me2Pk.broadPeak.gz
HUVEC	H3K9ac	Broad	None	GSM733735	http://hgdownload.cse.ucsc.edu/goldenPath/hg19/encodeDCC/wgEncodeBroadHistone/wgEncodeBroadHistoneHuvecH3k9acStdPk.broadPeak.gz
HUVEC	H3K9me1	Broad	None	GSM733703	http://hgdownload.cse.ucsc.edu/goldenPath/hg19/encodeDCC/wgEncodeBroadHistone/wgEncodeBroadHistoneHuvecH3k9me1StdPk.broadPeak.gz
HUVEC	H3K9me3	Broad	None	GSM1003517	http://hgdownload.cse.ucsc.edu/goldenPath/hg19/encodeDCC/wgEncodeBroadHistone/wgEncodeBroadHistoneHuvecH3k09me3Pk.broadPeak.gz
HUVEC	H4K20me1	Broad	None	GSM733640	http://hgdownload.cse.ucsc.edu/goldenPath/hg19/encodeDCC/wgEncodeBroadHistone/wgEncodeBroadHistoneHuvecH4k20me1StdPk.broadPeak.gz
HVMF	H3K4me3	UW	None	GSM945273	http://hgdownload.cse.ucsc.edu/goldenPath/hg19/encodeDCC/wgEncodeUwHistone/wgEncodeUwHistoneHvmfH3k4me3StdPkRep1.narrowPeak.gz
HVMF	H3K4me3	UW	None	GSM945273	http://hgdownload.cse.ucsc.edu/goldenPath/hg19/encodeDCC/wgEncodeUwHistone/wgEncodeUwHistoneHvmfH3k4me3StdHotspotsRep1.broadPeak.gz
Jurkat	H3K4me3	UW	None	GSM945267	http://hgdownload.cse.ucsc.edu/goldenPath/hg19/encodeDCC/wgEncodeUwHistone/wgEncodeUwHistoneJurkatH3k4me3StdPkRep1.narrowPeak.gz
Jurkat	H3K4me3	UW	None	GSM945267	http://hgdownload.cse.ucsc.edu/goldenPath/hg19/encodeDCC/wgEncodeUwHistone/wgEncodeUwHistoneJurkatH3k4me3StdHotspotsRep1.broadPeak.gz
K562	CBP_(sc-369)	Broad	None	GSM1003574	http://hgdownload.cse.ucsc.edu/goldenPath/hg19/encodeDCC/wgEncodeBroadHistone/wgEncodeBroadHistoneK562Cbpsc369Pk.broadPeak.gz
K562	CBX2	Broad	None	GSM1003567	http://hgdownload.cse.ucsc.edu/goldenPath/hg19/encodeDCC/wgEncodeBroadHistone/wgEncodeBroadHistoneK562Cbx2Pk.broadPeak.gz
K562	CBX3_(SC-101004)	Broad	None	GSM1003568	http://hgdownload.cse.ucsc.edu/goldenPath/hg19/encodeDCC/wgEncodeBroadHistone/wgEncodeBroadHistoneK562Cbx3sc101004Pk.broadPeak.gz
K562	CBX8	Broad	None	GSM1003569	http://hgdownload.cse.ucsc.edu/goldenPath/hg19/encodeDCC/wgEncodeBroadHistone/wgEncodeBroadHistoneK562Cbx8Pk.broadPeak.gz
K562	CHD1_(A301-218A)	Broad	None	GSM1003575	http://hgdownload.cse.ucsc.edu/goldenPath/hg19/encodeDCC/wgEncodeBroadHistone/wgEncodeBroadHistoneK562Chd1a301218aStdPk.broadPeak.gz
K562	CHD4_Mi2	Broad	None	GSM1003510	http://hgdownload.cse.ucsc.edu/goldenPath/hg19/encodeDCC/wgEncodeBroadHistone/wgEncodeBroadHistoneK562Chd4mi2Pk.broadPeak.gz
K562	CHD7_(A301-223A-1)	Broad	None	GSM1003478	http://hgdownload.cse.ucsc.edu/goldenPath/hg19/encodeDCC/wgEncodeBroadHistone/wgEncodeBroadHistoneK562Chd7a301223a1Pk.broadPeak.gz
K562	CTCF	Broad	None	GSM733719	http://hgdownload.cse.ucsc.edu/goldenPath/hg19/encodeDCC/wgEncodeBroadHistone/wgEncodeBroadHistoneK562CtcfStdPk.broadPeak.gz
K562	EZH2_(39875)	Broad	None	GSM1003576	http://hgdownload.cse.ucsc.edu/goldenPath/hg19/encodeDCC/wgEncodeBroadHistone/wgEncodeBroadHistoneK562Ezh239875StdPk.broadPeak.gz
K562	H2A.Z	Broad	None	GSM733786	http://hgdownload.cse.ucsc.edu/goldenPath/hg19/encodeDCC/wgEncodeBroadHistone/wgEncodeBroadHistoneK562H2azStdPk.broadPeak.gz
K562	H3K27ac	Broad	None	GSM733656	http://hgdownload.cse.ucsc.edu/goldenPath/hg19/encodeDCC/wgEncodeBroadHistone/wgEncodeBroadHistoneK562H3k27acStdPk.broadPeak.gz
K562	H3K27me3	Broad	None	GSM733658	http://hgdownload.cse.ucsc.edu/goldenPath/hg19/encodeDCC/wgEncodeBroadHistone/wgEncodeBroadHistoneK562H3k27me3StdPk.broadPeak.gz
K562	H3K27me3	UW	None	GSM945228	http://hgdownload.cse.ucsc.edu/goldenPath/hg19/encodeDCC/wgEncodeUwHistone/wgEncodeUwHistoneK562H3k27me3StdPkRep1.narrowPeak.gz
K562	H3K27me3	UW	None	GSM945228	http://hgdownload.cse.ucsc.edu/goldenPath/hg19/encodeDCC/wgEncodeUwHistone/wgEncodeUwHistoneK562H3k27me3StdHotspotsRep1.broadPeak.gz
K562	H3K27me3B	USC	None	GSM788088	http://hgdownload.cse.ucsc.edu/goldenPath/hg19/encodeDCC/wgEncodeSydhHistone/wgEncodeSydhHistoneK562H3k27me3bUcdPk.narrowPeak.gz
K562	H3K36me3	Broad	None	GSM733714	http://hgdownload.cse.ucsc.edu/goldenPath/hg19/encodeDCC/wgEncodeBroadHistone/wgEncodeBroadHistoneK562H3k36me3StdPk.broadPeak.gz
K562	H3K36me3	UW	None	GSM945302	http://hgdownload.cse.ucsc.edu/goldenPath/hg19/encodeDCC/wgEncodeUwHistone/wgEncodeUwHistoneK562H3k36me3StdPkRep1.narrowPeak.gz
K562	H3K36me3	UW	None	GSM945302	http://hgdownload.cse.ucsc.edu/goldenPath/hg19/encodeDCC/wgEncodeUwHistone/wgEncodeUwHistoneK562H3k36me3StdHotspotsRep1.broadPeak.gz
K562	H3K4me1	Broad	None	GSM733692	http://hgdownload.cse.ucsc.edu/goldenPath/hg19/encodeDCC/wgEncodeBroadHistone/wgEncodeBroadHistoneK562H3k4me1StdPk.broadPeak.gz
K562	H3K4me1	USC	None	GSM788085	http://hgdownload.cse.ucsc.edu/goldenPath/hg19/encodeDCC/wgEncodeSydhHistone/wgEncodeSydhHistoneK562H3k4me1UcdPk.narrowPeak.gz
K562	H3K4me2	Broad	None	GSM733651	http://hgdownload.cse.ucsc.edu/goldenPath/hg19/encodeDCC/wgEncodeBroadHistone/wgEncodeBroadHistoneK562H3k4me2StdPk.broadPeak.gz
K562	H3K4me3	Broad	None	GSM733680	http://hgdownload.cse.ucsc.edu/goldenPath/hg19/encodeDCC/wgEncodeBroadHistone/wgEncodeBroadHistoneK562H3k4me3StdPk.broadPeak.gz
K562	H3K4me3	UW	None	GSM945165	http://hgdownload.cse.ucsc.edu/goldenPath/hg19/encodeDCC/wgEncodeUwHistone/wgEncodeUwHistoneK562H3k4me3StdPkRep1.narrowPeak.gz
K562	H3K4me3	UW	None	GSM945165	http://hgdownload.cse.ucsc.edu/goldenPath/hg19/encodeDCC/wgEncodeUwHistone/wgEncodeUwHistoneK562H3k4me3StdHotspotsRep1.broadPeak.gz
K562	H3K4me3B	USC	None	GSM788087	http://hgdownload.cse.ucsc.edu/goldenPath/hg19/encodeDCC/wgEncodeSydhHistone/wgEncodeSydhHistoneK562H3k4me3bUcdPk.narrowPeak.gz
K562	H3K79me2	Broad	None	GSM733653	http://hgdownload.cse.ucsc.edu/goldenPath/hg19/encodeDCC/wgEncodeBroadHistone/wgEncodeBroadHistoneK562H3k79me2StdPk.broadPeak.gz
K562	H3K9ac	Broad	None	GSM733778	http://hgdownload.cse.ucsc.edu/goldenPath/hg19/encodeDCC/wgEncodeBroadHistone/wgEncodeBroadHistoneK562H3k9acStdPk.broadPeak.gz
K562	H3K9acB	USC	None	GSM788082	http://hgdownload.cse.ucsc.edu/goldenPath/hg19/encodeDCC/wgEncodeSydhHistone/wgEncodeSydhHistoneK562H3k9acbUcdPk.narrowPeak.gz
K562	H3K9me1	Broad	None	GSM733777	http://hgdownload.cse.ucsc.edu/goldenPath/hg19/encodeDCC/wgEncodeBroadHistone/wgEncodeBroadHistoneK562H3k9me1StdPk.broadPeak.gz
K562	H3K9me3	Broad	None	GSM733776	http://hgdownload.cse.ucsc.edu/goldenPath/hg19/encodeDCC/wgEncodeBroadHistone/wgEncodeBroadHistoneK562H3k9me3StdPk.broadPeak.gz
K562	H4K20me1	Broad	None	GSM733675	http://hgdownload.cse.ucsc.edu/goldenPath/hg19/encodeDCC/wgEncodeBroadHistone/wgEncodeBroadHistoneK562H4k20me1StdPk.broadPeak.gz
K562	HDAC1_(SC-6298)	Broad	None	GSM1003448	http://hgdownload.cse.ucsc.edu/goldenPath/hg19/encodeDCC/wgEncodeBroadHistone/wgEncodeBroadHistoneK562Hdac1sc6298StdPk.broadPeak.gz
K562	HDAC2_(A300-705A)	Broad	None	GSM1003447	http://hgdownload.cse.ucsc.edu/goldenPath/hg19/encodeDCC/wgEncodeBroadHistone/wgEncodeBroadHistoneK562Hdac2a300705aStdPk.broadPeak.gz
K562	HDAC6_(A301-341A)	Broad	None	GSM1003504	http://hgdownload.cse.ucsc.edu/goldenPath/hg19/encodeDCC/wgEncodeBroadHistone/wgEncodeBroadHistoneK562Hdac6a301341aPk.broadPeak.gz
K562	LSD1	Broad	None	GSM1003570	http://hgdownload.cse.ucsc.edu/goldenPath/hg19/encodeDCC/wgEncodeBroadHistone/wgEncodeBroadHistoneK562Lsd1Pk.broadPeak.gz
K562	NCoR	Broad	None	GSM1003565	http://hgdownload.cse.ucsc.edu/goldenPath/hg19/encodeDCC/wgEncodeBroadHistone/wgEncodeBroadHistoneK562NcorPk.broadPeak.gz
K562	NSD2_(ab75359)	Broad	None	GSM1003492	http://hgdownload.cse.ucsc.edu/goldenPath/hg19/encodeDCC/wgEncodeBroadHistone/wgEncodeBroadHistoneK562Nsd2ab75359Pk.broadPeak.gz
K562	p300	Broad	None	GSM1003583	http://hgdownload.cse.ucsc.edu/goldenPath/hg19/encodeDCC/wgEncodeBroadHistone/wgEncodeBroadHistoneK562P300StdPk.broadPeak.gz
K562	PCAF	Broad	None	GSM1003566	http://hgdownload.cse.ucsc.edu/goldenPath/hg19/encodeDCC/wgEncodeBroadHistone/wgEncodeBroadHistoneK562PcafPk.broadPeak.gz
K562	PHF8_(A301-772A)	Broad	None	GSM1003450	http://hgdownload.cse.ucsc.edu/goldenPath/hg19/encodeDCC/wgEncodeBroadHistone/wgEncodeBroadHistoneK562Phf8a301772aStdPk.broadPeak.gz
K562	PLU1	Broad	None	GSM1003586	http://hgdownload.cse.ucsc.edu/goldenPath/hg19/encodeDCC/wgEncodeBroadHistone/wgEncodeBroadHistoneK562Plu1StdPk.broadPeak.gz
K562	RBBP5_(A300-109A)	Broad	None	GSM1003449	http://hgdownload.cse.ucsc.edu/goldenPath/hg19/encodeDCC/wgEncodeBroadHistone/wgEncodeBroadHistoneK562Rbbp5a300109aStdPk.broadPeak.gz
K562	REST	Broad	None	GSM1003507	http://hgdownload.cse.ucsc.edu/goldenPath/hg19/encodeDCC/wgEncodeBroadHistone/wgEncodeBroadHistoneK562RestPk.broadPeak.gz
K562	RNF2	Broad	None	GSM1003563	http://hgdownload.cse.ucsc.edu/goldenPath/hg19/encodeDCC/wgEncodeBroadHistone/wgEncodeBroadHistoneK562Rnf2Pk.broadPeak.gz
K562	SAP30_(39731)	Broad	None	GSM1003445	http://hgdownload.cse.ucsc.edu/goldenPath/hg19/encodeDCC/wgEncodeBroadHistone/wgEncodeBroadHistoneK562Sap3039731StdPk.broadPeak.gz
K562	SETDB1	Broad	None	GSM1003452	http://hgdownload.cse.ucsc.edu/goldenPath/hg19/encodeDCC/wgEncodeBroadHistone/wgEncodeBroadHistoneK562Setdb1Pk.broadPeak.gz
K562	SIRT6	Broad	None	GSM1003560	http://hgdownload.cse.ucsc.edu/goldenPath/hg19/encodeDCC/wgEncodeBroadHistone/wgEncodeBroadHistoneK562Sirt6Pk.broadPeak.gz
K562	SUZ12_(05-1317)	Broad	None	GSM1003545	http://hgdownload.cse.ucsc.edu/goldenPath/hg19/encodeDCC/wgEncodeBroadHistone/wgEncodeBroadHistoneK562Suz12051317Pk.broadPeak.gz
LNCaP	H3K4me3	UW	None	GSM945240	http://hgdownload.cse.ucsc.edu/goldenPath/hg19/encodeDCC/wgEncodeUwHistone/wgEncodeUwHistoneLncapH3k04me3StdPkRep1.narrowPeak.gz
LNCaP	H3K4me3	UW	None	GSM945240	http://hgdownload.cse.ucsc.edu/goldenPath/hg19/encodeDCC/wgEncodeUwHistone/wgEncodeUwHistoneLncapH3k04me3StdHotspotsRep1.broadPeak.gz
MCF-7	H3K27ac	USC	None	GSM945854	http://hgdownload.cse.ucsc.edu/goldenPath/hg19/encodeDCC/wgEncodeSydhHistone/wgEncodeSydhHistoneMcf7H3k27acUcdPk.narrowPeak.gz
MCF-7	H3K27me3B	USC	None	GSM970218	http://hgdownload.cse.ucsc.edu/goldenPath/hg19/encodeDCC/wgEncodeSydhHistone/wgEncodeSydhHistoneMcf7H3k27me3bUcdPk.narrowPeak.gz
MCF-7	H3K36me3B	USC	None	GSM970217	http://hgdownload.cse.ucsc.edu/goldenPath/hg19/encodeDCC/wgEncodeSydhHistone/wgEncodeSydhHistoneMcf7H3k36me3bUcdPk.narrowPeak.gz
MCF-7	H3K4me3	UW	None	GSM945269	http://hgdownload.cse.ucsc.edu/goldenPath/hg19/encodeDCC/wgEncodeUwHistone/wgEncodeUwHistoneMcf7H3k4me3StdPkRep1.narrowPeak.gz
MCF-7	H3K4me3	UW	None	GSM945269	http://hgdownload.cse.ucsc.edu/goldenPath/hg19/encodeDCC/wgEncodeUwHistone/wgEncodeUwHistoneMcf7H3k4me3StdHotspotsRep1.broadPeak.gz
MCF-7	H3K9me3	USC	None	GSM945857	http://hgdownload.cse.ucsc.edu/goldenPath/hg19/encodeDCC/wgEncodeSydhHistone/wgEncodeSydhHistoneMcf7H3k09me3UcdPk.narrowPeak.gz
Monocytes-CD14+_RO01746	CTCF	Broad	None	GSM1003508	http://hgdownload.cse.ucsc.edu/goldenPath/hg19/encodeDCC/wgEncodeBroadHistone/wgEncodeBroadHistoneMonocd14ro1746CtcfPk.broadPeak.gz
Monocytes-CD14+_RO01746	H2A.Z	Broad	None	GSM1003548	http://hgdownload.cse.ucsc.edu/goldenPath/hg19/encodeDCC/wgEncodeBroadHistone/wgEncodeBroadHistoneMonocd14ro1746H2azPk.broadPeak.gz
Monocytes-CD14+_RO01746	H3K27ac	Broad	None	GSM1003559	http://hgdownload.cse.ucsc.edu/goldenPath/hg19/encodeDCC/wgEncodeBroadHistone/wgEncodeBroadHistoneMonocd14ro1746H3k27acPk.broadPeak.gz
Monocytes-CD14+_RO01746	H3K27me3	Broad	None	GSM1003564	http://hgdownload.cse.ucsc.edu/goldenPath/hg19/encodeDCC/wgEncodeBroadHistone/wgEncodeBroadHistoneMonocd14ro1746H3k27me3Pk.broadPeak.gz
Monocytes-CD14+_RO01746	H3K27me3	UW	None	GSM945301	http://hgdownload.cse.ucsc.edu/goldenPath/hg19/encodeDCC/wgEncodeUwHistone/wgEncodeUwHistoneMonocd14ro1746H3k27me3StdPkRep1.narrowPeak.gz
Monocytes-CD14+_RO01746	H3K27me3	UW	None	GSM945301	http://hgdownload.cse.ucsc.edu/goldenPath/hg19/encodeDCC/wgEncodeUwHistone/wgEncodeUwHistoneMonocd14ro1746H3k27me3StdHotspotsRep1.broadPeak.gz
Monocytes-CD14+_RO01746	H3K36me3	Broad	None	GSM1003562	http://hgdownload.cse.ucsc.edu/goldenPath/hg19/encodeDCC/wgEncodeBroadHistone/wgEncodeBroadHistoneMonocd14ro1746H3k36me3Pk.broadPeak.gz
Monocytes-CD14+_RO01746	H3K4me1	Broad	None	GSM1003535	http://hgdownload.cse.ucsc.edu/goldenPath/hg19/encodeDCC/wgEncodeBroadHistone/wgEncodeBroadHistoneMonocd14ro1746H3k04me1Pk.broadPeak.gz
Monocytes-CD14+_RO01746	H3K4me2	Broad	None	GSM1003516	http://hgdownload.cse.ucsc.edu/goldenPath/hg19/encodeDCC/wgEncodeBroadHistone/wgEncodeBroadHistoneMonocd14ro1746H3k04me2Pk.broadPeak.gz
Monocytes-CD14+_RO01746	H3K4me3	Broad	None	GSM1003536	http://hgdownload.cse.ucsc.edu/goldenPath/hg19/encodeDCC/wgEncodeBroadHistone/wgEncodeBroadHistoneMonocd14ro1746H3k04me3Pk.broadPeak.gz
Monocytes-CD14+_RO01746	H3K4me3	UW	None	GSM945225	http://hgdownload.cse.ucsc.edu/goldenPath/hg19/encodeDCC/wgEncodeUwHistone/wgEncodeUwHistoneMonocd14ro1746H3k04me3StdPkRep1.narrowPeak.gz
Monocytes-CD14+_RO01746	H3K4me3	UW	None	GSM945225	http://hgdownload.cse.ucsc.edu/goldenPath/hg19/encodeDCC/wgEncodeUwHistone/wgEncodeUwHistoneMonocd14ro1746H3k04me3StdHotspotsRep1.broadPeak.gz
Monocytes-CD14+_RO01746	H3K79me2	Broad	None	GSM1003537	http://hgdownload.cse.ucsc.edu/goldenPath/hg19/encodeDCC/wgEncodeBroadHistone/wgEncodeBroadHistoneMonocd14ro1746H3k79me2Pk.broadPeak.gz
Monocytes-CD14+_RO01746	H3K9ac	Broad	None	GSM1003515	http://hgdownload.cse.ucsc.edu/goldenPath/hg19/encodeDCC/wgEncodeBroadHistone/wgEncodeBroadHistoneMonocd14ro1746H3k09acPk.broadPeak.gz
Monocytes-CD14+_RO01746	H3K9me3	Broad	None	GSM1003538	http://hgdownload.cse.ucsc.edu/goldenPath/hg19/encodeDCC/wgEncodeBroadHistone/wgEncodeBroadHistoneMonocd14ro1746H3k09me3Pk.broadPeak.gz
Monocytes-CD14+_RO01746	H4K20me1	Broad	None	GSM1003539	http://hgdownload.cse.ucsc.edu/goldenPath/hg19/encodeDCC/wgEncodeBroadHistone/wgEncodeBroadHistoneMonocd14ro1746H4k20me1Pk.broadPeak.gz
NB4	H3K4me3	UW	None	GSM945275	http://hgdownload.cse.ucsc.edu/goldenPath/hg19/encodeDCC/wgEncodeUwHistone/wgEncodeUwHistoneNb4H3k4me3StdPkRep1.narrowPeak.gz
NB4	H3K4me3	UW	None	GSM945275	http://hgdownload.cse.ucsc.edu/goldenPath/hg19/encodeDCC/wgEncodeUwHistone/wgEncodeUwHistoneNb4H3k4me3StdHotspotsRep1.broadPeak.gz
NH-A	CTCF	Broad	None	GSM733765	http://hgdownload.cse.ucsc.edu/goldenPath/hg19/encodeDCC/wgEncodeBroadHistone/wgEncodeBroadHistoneNhaCtcfStdPk.broadPeak.gz
NH-A	EZH2_(39875)	Broad	None	GSM1003532	http://hgdownload.cse.ucsc.edu/goldenPath/hg19/encodeDCC/wgEncodeBroadHistone/wgEncodeBroadHistoneNhaEzh239875Pk.broadPeak.gz
NH-A	H2A.Z	Broad	None	GSM1003499	http://hgdownload.cse.ucsc.edu/goldenPath/hg19/encodeDCC/wgEncodeBroadHistone/wgEncodeBroadHistoneNhaH2azPk.broadPeak.gz
NH-A	H3K27ac	Broad	None	GSM733763	http://hgdownload.cse.ucsc.edu/goldenPath/hg19/encodeDCC/wgEncodeBroadHistone/wgEncodeBroadHistoneNhaH3k27acStdPk.broadPeak.gz
NH-A	H3K27me3	Broad	None	GSM733729	http://hgdownload.cse.ucsc.edu/goldenPath/hg19/encodeDCC/wgEncodeBroadHistone/wgEncodeBroadHistoneNhaH3k27me3StdPk.broadPeak.gz
NH-A	H3K36me3	Broad	None	GSM733751	http://hgdownload.cse.ucsc.edu/goldenPath/hg19/encodeDCC/wgEncodeBroadHistone/wgEncodeBroadHistoneNhaH3k36me3StdPk.broadPeak.gz
NH-A	H3K4me1	Broad	None	GSM733710	http://hgdownload.cse.ucsc.edu/goldenPath/hg19/encodeDCC/wgEncodeBroadHistone/wgEncodeBroadHistoneNhaH3k4me1StdPk.broadPeak.gz
NH-A	H3K4me2	Broad	None	GSM1003533	http://hgdownload.cse.ucsc.edu/goldenPath/hg19/encodeDCC/wgEncodeBroadHistone/wgEncodeBroadHistoneNhaH3k04me2Pk.broadPeak.gz
NH-A	H3K4me3	Broad	None	GSM733747	http://hgdownload.cse.ucsc.edu/goldenPath/hg19/encodeDCC/wgEncodeBroadHistone/wgEncodeBroadHistoneNhaH3k4me3StdPk.broadPeak.gz
NH-A	H3K79me2	Broad	None	GSM1003490	http://hgdownload.cse.ucsc.edu/goldenPath/hg19/encodeDCC/wgEncodeBroadHistone/wgEncodeBroadHistoneNhaH3k79me2Pk.broadPeak.gz
NH-A	H3K9ac	Broad	None	GSM1003534	http://hgdownload.cse.ucsc.edu/goldenPath/hg19/encodeDCC/wgEncodeBroadHistone/wgEncodeBroadHistoneNhaH3k09acPk.broadPeak.gz
NH-A	H3K9me3	Broad	None	GSM1003491	http://hgdownload.cse.ucsc.edu/goldenPath/hg19/encodeDCC/wgEncodeBroadHistone/wgEncodeBroadHistoneNhaH3k09me3Pk.broadPeak.gz
NH-A	H4K20me1	Broad	None	GSM1003525	http://hgdownload.cse.ucsc.edu/goldenPath/hg19/encodeDCC/wgEncodeBroadHistone/wgEncodeBroadHistoneNhaH4k20me1Pk.broadPeak.gz
NHDF-Ad	CTCF	Broad	None	GSM733744	http://hgdownload.cse.ucsc.edu/goldenPath/hg19/encodeDCC/wgEncodeBroadHistone/wgEncodeBroadHistoneNhdfadCtcfStdPk.broadPeak.gz
NHDF-Ad	EZH2_(39875)	Broad	None	GSM1003550	http://hgdownload.cse.ucsc.edu/goldenPath/hg19/encodeDCC/wgEncodeBroadHistone/wgEncodeBroadHistoneNhdfadEzh239875Pk.broadPeak.gz
NHDF-Ad	H2A.Z	Broad	None	GSM1003505	http://hgdownload.cse.ucsc.edu/goldenPath/hg19/encodeDCC/wgEncodeBroadHistone/wgEncodeBroadHistoneNhdfadH2azPk.broadPeak.gz
NHDF-Ad	H3K27ac	Broad	None	GSM733662	http://hgdownload.cse.ucsc.edu/goldenPath/hg19/encodeDCC/wgEncodeBroadHistone/wgEncodeBroadHistoneNhdfadH3k27acStdPk.broadPeak.gz
NHDF-Ad	H3K27me3	Broad	None	GSM733745	http://hgdownload.cse.ucsc.edu/goldenPath/hg19/encodeDCC/wgEncodeBroadHistone/wgEncodeBroadHistoneNhdfadH3k27me3StdPk.broadPeak.gz
NHDF-Ad	H3K36me3	Broad	None	GSM733733	http://hgdownload.cse.ucsc.edu/goldenPath/hg19/encodeDCC/wgEncodeBroadHistone/wgEncodeBroadHistoneNhdfadH3k36me3StdPk.broadPeak.gz
NHDF-Ad	H3K4me1	Broad	None	GSM1003526	http://hgdownload.cse.ucsc.edu/goldenPath/hg19/encodeDCC/wgEncodeBroadHistone/wgEncodeBroadHistoneNhdfadH3k04me1Pk.broadPeak.gz
NHDF-Ad	H3K4me2	Broad	None	GSM733753	http://hgdownload.cse.ucsc.edu/goldenPath/hg19/encodeDCC/wgEncodeBroadHistone/wgEncodeBroadHistoneNhdfadH3k4me2StdPk.broadPeak.gz
NHDF-Ad	H3K4me3	Broad	None	GSM733650	http://hgdownload.cse.ucsc.edu/goldenPath/hg19/encodeDCC/wgEncodeBroadHistone/wgEncodeBroadHistoneNhdfadH3k4me3StdPk.broadPeak.gz
NHDF-Ad	H3K79me2	Broad	None	GSM1003554	http://hgdownload.cse.ucsc.edu/goldenPath/hg19/encodeDCC/wgEncodeBroadHistone/wgEncodeBroadHistoneNhdfadH3k79me2Pk.broadPeak.gz
NHDF-Ad	H3K9ac	Broad	None	GSM733709	http://hgdownload.cse.ucsc.edu/goldenPath/hg19/encodeDCC/wgEncodeBroadHistone/wgEncodeBroadHistoneNhdfadH3k9acStdPk.broadPeak.gz
NHDF-Ad	H3K9me3	Broad	None	GSM1003553	http://hgdownload.cse.ucsc.edu/goldenPath/hg19/encodeDCC/wgEncodeBroadHistone/wgEncodeBroadHistoneNhdfadH3k09me3Pk.broadPeak.gz
NHDF-Ad	H4K20me1	Broad	None	GSM1003486	http://hgdownload.cse.ucsc.edu/goldenPath/hg19/encodeDCC/wgEncodeBroadHistone/wgEncodeBroadHistoneNhdfadH4k20me1Pk.broadPeak.gz
NHDF-neo	H3K4me3	UW	None	GSM945251	http://hgdownload.cse.ucsc.edu/goldenPath/hg19/encodeDCC/wgEncodeUwHistone/wgEncodeUwHistoneNhdfneoH3k4me3StdPkRep1.narrowPeak.gz
NHDF-neo	H3K4me3	UW	None	GSM945251	http://hgdownload.cse.ucsc.edu/goldenPath/hg19/encodeDCC/wgEncodeUwHistone/wgEncodeUwHistoneNhdfneoH3k4me3StdHotspotsRep1.broadPeak.gz
NHEK	CTCF	Broad	None	GSM733636	http://hgdownload.cse.ucsc.edu/goldenPath/hg19/encodeDCC/wgEncodeBroadHistone/wgEncodeBroadHistoneNhekCtcfStdPk.broadPeak.gz
NHEK	EZH2_(39875)	Broad	None	GSM1003489	http://hgdownload.cse.ucsc.edu/goldenPath/hg19/encodeDCC/wgEncodeBroadHistone/wgEncodeBroadHistoneNhekEzh239875Pk.broadPeak.gz
NHEK	H2A.Z	Broad	None	GSM1003488	http://hgdownload.cse.ucsc.edu/goldenPath/hg19/encodeDCC/wgEncodeBroadHistone/wgEncodeBroadHistoneNhekH2azPk.broadPeak.gz
NHEK	H3K27ac	Broad	None	GSM733674	http://hgdownload.cse.ucsc.edu/goldenPath/hg19/encodeDCC/wgEncodeBroadHistone/wgEncodeBroadHistoneNhekH3k27acStdPk.broadPeak.gz
NHEK	H3K27me3	Broad	None	GSM733701	http://hgdownload.cse.ucsc.edu/goldenPath/hg19/encodeDCC/wgEncodeBroadHistone/wgEncodeBroadHistoneNhekH3k27me3StdPk.broadPeak.gz
NHEK	H3K27me3	UW	None	GSM945300	http://hgdownload.cse.ucsc.edu/goldenPath/hg19/encodeDCC/wgEncodeUwHistone/wgEncodeUwHistoneNhekH3k27me3StdPkRep1.narrowPeak.gz
NHEK	H3K27me3	UW	None	GSM945300	http://hgdownload.cse.ucsc.edu/goldenPath/hg19/encodeDCC/wgEncodeUwHistone/wgEncodeUwHistoneNhekH3k27me3StdHotspotsRep1.broadPeak.gz
NHEK	H3K36me3	Broad	None	GSM733726	http://hgdownload.cse.ucsc.edu/goldenPath/hg19/encodeDCC/wgEncodeBroadHistone/wgEncodeBroadHistoneNhekH3k36me3StdPk.broadPeak.gz
NHEK	H3K36me3	UW	None	GSM945174	http://hgdownload.cse.ucsc.edu/goldenPath/hg19/encodeDCC/wgEncodeUwHistone/wgEncodeUwHistoneNhekH3k36me3StdPkRep1.narrowPeak.gz
NHEK	H3K36me3	UW	None	GSM945174	http://hgdownload.cse.ucsc.edu/goldenPath/hg19/encodeDCC/wgEncodeUwHistone/wgEncodeUwHistoneNhekH3k36me3StdHotspotsRep1.broadPeak.gz
NHEK	H3K4me1	Broad	None	GSM733698	http://hgdownload.cse.ucsc.edu/goldenPath/hg19/encodeDCC/wgEncodeBroadHistone/wgEncodeBroadHistoneNhekH3k4me1StdPk.broadPeak.gz
NHEK	H3K4me2	Broad	None	GSM733686	http://hgdownload.cse.ucsc.edu/goldenPath/hg19/encodeDCC/wgEncodeBroadHistone/wgEncodeBroadHistoneNhekH3k4me2StdPk.broadPeak.gz
NHEK	H3K4me3	Broad	None	GSM733720	http://hgdownload.cse.ucsc.edu/goldenPath/hg19/encodeDCC/wgEncodeBroadHistone/wgEncodeBroadHistoneNhekH3k4me3StdPk.broadPeak.gz
NHEK	H3K4me3	UW	None	GSM945175	http://hgdownload.cse.ucsc.edu/goldenPath/hg19/encodeDCC/wgEncodeUwHistone/wgEncodeUwHistoneNhekH3k4me3StdPkRep1.narrowPeak.gz
NHEK	H3K4me3	UW	None	GSM945175	http://hgdownload.cse.ucsc.edu/goldenPath/hg19/encodeDCC/wgEncodeUwHistone/wgEncodeUwHistoneNhekH3k4me3StdHotspotsRep1.broadPeak.gz
NHEK	H3K79me2	Broad	None	GSM1003527	http://hgdownload.cse.ucsc.edu/goldenPath/hg19/encodeDCC/wgEncodeBroadHistone/wgEncodeBroadHistoneNhekH3k79me2Pk.broadPeak.gz
NHEK	H3K9ac	Broad	None	GSM733665	http://hgdownload.cse.ucsc.edu/goldenPath/hg19/encodeDCC/wgEncodeBroadHistone/wgEncodeBroadHistoneNhekH3k9acStdPk.broadPeak.gz
NHEK	H3K9me1	Broad	None	GSM733655	http://hgdownload.cse.ucsc.edu/goldenPath/hg19/encodeDCC/wgEncodeBroadHistone/wgEncodeBroadHistoneNhekH3k9me1StdPk.broadPeak.gz
NHEK	H3K9me3	Broad	None	GSM1003528	http://hgdownload.cse.ucsc.edu/goldenPath/hg19/encodeDCC/wgEncodeBroadHistone/wgEncodeBroadHistoneNhekH3k09me3Pk.broadPeak.gz
NHEK	H4K20me1	Broad	None	GSM733728	http://hgdownload.cse.ucsc.edu/goldenPath/hg19/encodeDCC/wgEncodeBroadHistone/wgEncodeBroadHistoneNhekH4k20me1StdPk.broadPeak.gz
NHLF	CTCF	Broad	None	GSM733695	http://hgdownload.cse.ucsc.edu/goldenPath/hg19/encodeDCC/wgEncodeBroadHistone/wgEncodeBroadHistoneNhlfCtcfStdPk.broadPeak.gz
NHLF	EZH2_(39875)	Broad	None	GSM1003529	http://hgdownload.cse.ucsc.edu/goldenPath/hg19/encodeDCC/wgEncodeBroadHistone/wgEncodeBroadHistoneNhlfEzh239875Pk.broadPeak.gz
NHLF	H2A.Z	Broad	None	GSM1003530	http://hgdownload.cse.ucsc.edu/goldenPath/hg19/encodeDCC/wgEncodeBroadHistone/wgEncodeBroadHistoneNhlfH2azPk.broadPeak.gz
NHLF	H3K27ac	Broad	None	GSM733646	http://hgdownload.cse.ucsc.edu/goldenPath/hg19/encodeDCC/wgEncodeBroadHistone/wgEncodeBroadHistoneNhlfH3k27acStdPk.broadPeak.gz
NHLF	H3K27me3	Broad	None	GSM733764	http://hgdownload.cse.ucsc.edu/goldenPath/hg19/encodeDCC/wgEncodeBroadHistone/wgEncodeBroadHistoneNhlfH3k27me3StdPk.broadPeak.gz
NHLF	H3K36me3	Broad	None	GSM733699	http://hgdownload.cse.ucsc.edu/goldenPath/hg19/encodeDCC/wgEncodeBroadHistone/wgEncodeBroadHistoneNhlfH3k36me3StdPk.broadPeak.gz
NHLF	H3K4me1	Broad	None	GSM733649	http://hgdownload.cse.ucsc.edu/goldenPath/hg19/encodeDCC/wgEncodeBroadHistone/wgEncodeBroadHistoneNhlfH3k4me1StdPk.broadPeak.gz
NHLF	H3K4me2	Broad	None	GSM733781	http://hgdownload.cse.ucsc.edu/goldenPath/hg19/encodeDCC/wgEncodeBroadHistone/wgEncodeBroadHistoneNhlfH3k4me2StdPk.broadPeak.gz
NHLF	H3K4me3	Broad	None	GSM733723	http://hgdownload.cse.ucsc.edu/goldenPath/hg19/encodeDCC/wgEncodeBroadHistone/wgEncodeBroadHistoneNhlfH3k4me3StdPk.broadPeak.gz
NHLF	H3K4me3	UW	None	GSM945262	http://hgdownload.cse.ucsc.edu/goldenPath/hg19/encodeDCC/wgEncodeUwHistone/wgEncodeUwHistoneNhlfH3k04me3StdPkRep1.narrowPeak.gz
NHLF	H3K4me3	UW	None	GSM945262	http://hgdownload.cse.ucsc.edu/goldenPath/hg19/encodeDCC/wgEncodeUwHistone/wgEncodeUwHistoneNhlfH3k04me3StdHotspotsRep1.broadPeak.gz
NHLF	H3K79me2	Broad	None	GSM1003549	http://hgdownload.cse.ucsc.edu/goldenPath/hg19/encodeDCC/wgEncodeBroadHistone/wgEncodeBroadHistoneNhlfH3k79me2Pk.broadPeak.gz
NHLF	H3K9ac	Broad	None	GSM733652	http://hgdownload.cse.ucsc.edu/goldenPath/hg19/encodeDCC/wgEncodeBroadHistone/wgEncodeBroadHistoneNhlfH3k9acStdPk.broadPeak.gz
NHLF	H3K9me3	Broad	None	GSM1003531	http://hgdownload.cse.ucsc.edu/goldenPath/hg19/encodeDCC/wgEncodeBroadHistone/wgEncodeBroadHistoneNhlfH3k09me3Pk.broadPeak.gz
NHLF	H4K20me1	Broad	None	GSM733706	http://hgdownload.cse.ucsc.edu/goldenPath/hg19/encodeDCC/wgEncodeBroadHistone/wgEncodeBroadHistoneNhlfH4k20me1StdPk.broadPeak.gz
NT2-D1	H3K27me3B	USC	None	GSM788071	http://hgdownload.cse.ucsc.edu/goldenPath/hg19/encodeDCC/wgEncodeSydhHistone/wgEncodeSydhHistoneNt2d1H3k27me3bUcdPk.narrowPeak.gz
NT2-D1	H3K36me3B	USC	None	GSM788081	http://hgdownload.cse.ucsc.edu/goldenPath/hg19/encodeDCC/wgEncodeSydhHistone/wgEncodeSydhHistoneNt2d1H3k36me3bUcdPk.narrowPeak.gz
NT2-D1	H3K4me1	USC	None	GSM788083	http://hgdownload.cse.ucsc.edu/goldenPath/hg19/encodeDCC/wgEncodeSydhHistone/wgEncodeSydhHistoneNt2d1H3k4me1UcdPk.narrowPeak.gz
NT2-D1	H3K4me3B	USC	None	GSM788072	http://hgdownload.cse.ucsc.edu/goldenPath/hg19/encodeDCC/wgEncodeSydhHistone/wgEncodeSydhHistoneNt2d1H3k4me3bUcdPk.narrowPeak.gz
NT2-D1	H3K9acB	USC	None	GSM788086	http://hgdownload.cse.ucsc.edu/goldenPath/hg19/encodeDCC/wgEncodeSydhHistone/wgEncodeSydhHistoneNt2d1H3k9acbUcdPk.narrowPeak.gz
NT2-D1	H3K9me3	USC	None	GSM788080	http://hgdownload.cse.ucsc.edu/goldenPath/hg19/encodeDCC/wgEncodeSydhHistone/wgEncodeSydhHistoneNt2d1H3k09me3UcdPk.narrowPeak.gz
Osteobl	CTCF	Broad	None	GSM733784	http://hgdownload.cse.ucsc.edu/goldenPath/hg19/encodeDCC/wgEncodeBroadHistone/wgEncodeBroadHistoneOsteoblCtcfStdPk.broadPeak.gz
Osteobl	H2A.Z	Broad	None	GSM733766	http://hgdownload.cse.ucsc.edu/goldenPath/hg19/encodeDCC/wgEncodeBroadHistone/wgEncodeBroadHistoneOsteoblH2azStdPk.broadPeak.gz
Osteobl	H3K27ac	Broad	None	GSM733739	http://hgdownload.cse.ucsc.edu/goldenPath/hg19/encodeDCC/wgEncodeBroadHistone/wgEncodeBroadHistoneOsteoblH3k27acStdPk.broadPeak.gz
Osteobl	H3K27me3	Broad	None	GSM1003466	http://hgdownload.cse.ucsc.edu/goldenPath/hg19/encodeDCC/wgEncodeBroadHistone/wgEncodeBroadHistoneOsteoH3k27me3Pk.broadPeak.gz
Osteobl	H3K36me3	Broad	None	GSM733721	http://hgdownload.cse.ucsc.edu/goldenPath/hg19/encodeDCC/wgEncodeBroadHistone/wgEncodeBroadHistoneOsteoblH3k36me3StdPk.broadPeak.gz
Osteobl	H3K4me1	Broad	None	GSM733704	http://hgdownload.cse.ucsc.edu/goldenPath/hg19/encodeDCC/wgEncodeBroadHistone/wgEncodeBroadHistoneOsteoblH3k4me1StdPk.broadPeak.gz
Osteobl	H3K4me2	Broad	None	GSM733779	http://hgdownload.cse.ucsc.edu/goldenPath/hg19/encodeDCC/wgEncodeBroadHistone/wgEncodeBroadHistoneOsteoblH3k4me2StdPk.broadPeak.gz
Osteobl	H3K4me3	Broad	None	GSM1003506	http://hgdownload.cse.ucsc.edu/goldenPath/hg19/encodeDCC/wgEncodeBroadHistone/wgEncodeBroadHistoneOsteoH3k04me3Pk.broadPeak.gz
Osteobl	H3K79me2	Broad	None	GSM1003502	http://hgdownload.cse.ucsc.edu/goldenPath/hg19/encodeDCC/wgEncodeBroadHistone/wgEncodeBroadHistoneOsteoH3k79me2Pk.broadPeak.gz
Osteobl	H3K9me3	Broad	None	GSM733681	http://hgdownload.cse.ucsc.edu/goldenPath/hg19/encodeDCC/wgEncodeBroadHistone/wgEncodeBroadHistoneOsteoblH3k9me3StdPk.broadPeak.gz
Osteobl	H4K20me1	Broad	None	GSM1003467	http://hgdownload.cse.ucsc.edu/goldenPath/hg19/encodeDCC/wgEncodeBroadHistone/wgEncodeBroadHistoneOsteoH4k20me1Pk.broadPeak.gz
Osteobl	P300_KAT3B	Broad	None	GSM1003514	http://hgdownload.cse.ucsc.edu/goldenPath/hg19/encodeDCC/wgEncodeBroadHistone/wgEncodeBroadHistoneOsteoP300kat3bPk.broadPeak.gz
PANC-1	H3K27ac	USC	None	GSM818826	http://hgdownload.cse.ucsc.edu/goldenPath/hg19/encodeDCC/wgEncodeSydhHistone/wgEncodeSydhHistonePanc1H3k27acUcdPk.narrowPeak.gz
PANC-1	H3K4me1_(pAb-037-050)	USC	None	GSM818827	http://hgdownload.cse.ucsc.edu/goldenPath/hg19/encodeDCC/wgEncodeSydhHistone/wgEncodeSydhHistonePanc1H3k04me1bUcdPk.narrowPeak.gz
PANC-1	H3K4me3	UW	None	GSM945261	http://hgdownload.cse.ucsc.edu/goldenPath/hg19/encodeDCC/wgEncodeUwHistone/wgEncodeUwHistonePanc1H3k04me3StdPkRep1.narrowPeak.gz
PANC-1	H3K4me3	UW	None	GSM945261	http://hgdownload.cse.ucsc.edu/goldenPath/hg19/encodeDCC/wgEncodeUwHistone/wgEncodeUwHistonePanc1H3k04me3StdHotspotsRep1.broadPeak.gz
PANC-1	H3K4me3B	USC	None	GSM945856	http://hgdownload.cse.ucsc.edu/goldenPath/hg19/encodeDCC/wgEncodeSydhHistone/wgEncodeSydhHistonePanc1H3k04me3bUcdPk.narrowPeak.gz
PBMC	H3K27me3B	USC	None	GSM788073	http://hgdownload.cse.ucsc.edu/goldenPath/hg19/encodeDCC/wgEncodeSydhHistone/wgEncodeSydhHistonePbmcH3k27me3bUcdPk.narrowPeak.gz
PBMC	H3K4me1	USC	None	GSM788084	http://hgdownload.cse.ucsc.edu/goldenPath/hg19/encodeDCC/wgEncodeSydhHistone/wgEncodeSydhHistonePbmcH3k4me1UcdPk.narrowPeak.gz
PBMC	H3K4me3B	USC	None	GSM788075	http://hgdownload.cse.ucsc.edu/goldenPath/hg19/encodeDCC/wgEncodeSydhHistone/wgEncodeSydhHistonePbmcH3k04me3bUcdPk.narrowPeak.gz
PBMC	H3K9me3	USC	None	GSM788079	http://hgdownload.cse.ucsc.edu/goldenPath/hg19/encodeDCC/wgEncodeSydhHistone/wgEncodeSydhHistonePbmcH3k9me3UcdPk.narrowPeak.gz
RPTEC	H3K4me3	UW	None	GSM945216	http://hgdownload.cse.ucsc.edu/goldenPath/hg19/encodeDCC/wgEncodeUwHistone/wgEncodeUwHistoneRptecH3k04me3StdPkRep1.narrowPeak.gz
RPTEC	H3K4me3	UW	None	GSM945216	http://hgdownload.cse.ucsc.edu/goldenPath/hg19/encodeDCC/wgEncodeUwHistone/wgEncodeUwHistoneRptecH3k04me3StdHotspotsRep1.broadPeak.gz
SAEC	H3K27me3	UW	None	GSM945200	http://hgdownload.cse.ucsc.edu/goldenPath/hg19/encodeDCC/wgEncodeUwHistone/wgEncodeUwHistoneSaecH3k27me3StdPkRep1.narrowPeak.gz
SAEC	H3K27me3	UW	None	GSM945200	http://hgdownload.cse.ucsc.edu/goldenPath/hg19/encodeDCC/wgEncodeUwHistone/wgEncodeUwHistoneSaecH3k27me3StdHotspotsRep1.broadPeak.gz
SAEC	H3K36me3	UW	None	GSM945226	http://hgdownload.cse.ucsc.edu/goldenPath/hg19/encodeDCC/wgEncodeUwHistone/wgEncodeUwHistoneSaecH3k36me3StdPkRep1.narrowPeak.gz
SAEC	H3K36me3	UW	None	GSM945226	http://hgdownload.cse.ucsc.edu/goldenPath/hg19/encodeDCC/wgEncodeUwHistone/wgEncodeUwHistoneSaecH3k36me3StdHotspotsRep1.broadPeak.gz
SAEC	H3K4me3	UW	None	GSM945199	http://hgdownload.cse.ucsc.edu/goldenPath/hg19/encodeDCC/wgEncodeUwHistone/wgEncodeUwHistoneSaecH3k4me3StdPkRep1.narrowPeak.gz
SAEC	H3K4me3	UW	None	GSM945199	http://hgdownload.cse.ucsc.edu/goldenPath/hg19/encodeDCC/wgEncodeUwHistone/wgEncodeUwHistoneSaecH3k4me3StdHotspotsRep1.broadPeak.gz
SK-N-MC	H3K4me3	UW	None	GSM945264	http://hgdownload.cse.ucsc.edu/goldenPath/hg19/encodeDCC/wgEncodeUwHistone/wgEncodeUwHistoneSknmcH3k04me3StdPkRep1.narrowPeak.gz
SK-N-MC	H3K4me3	UW	None	GSM945264	http://hgdownload.cse.ucsc.edu/goldenPath/hg19/encodeDCC/wgEncodeUwHistone/wgEncodeUwHistoneSknmcH3k04me3StdHotspotsRep1.broadPeak.gz
SK-N-SH_RA	H3K27me3	UW	None	GSM945210	http://hgdownload.cse.ucsc.edu/goldenPath/hg19/encodeDCC/wgEncodeUwHistone/wgEncodeUwHistoneSknshraH3k27me3StdPkRep1.narrowPeak.gz
SK-N-SH_RA	H3K27me3	UW	None	GSM945210	http://hgdownload.cse.ucsc.edu/goldenPath/hg19/encodeDCC/wgEncodeUwHistone/wgEncodeUwHistoneSknshraH3k27me3StdHotspotsRep1.broadPeak.gz
SK-N-SH_RA	H3K36me3	UW	None	GSM945209	http://hgdownload.cse.ucsc.edu/goldenPath/hg19/encodeDCC/wgEncodeUwHistone/wgEncodeUwHistoneSknshraH3k36me3StdPkRep1.narrowPeak.gz
SK-N-SH_RA	H3K36me3	UW	None	GSM945209	http://hgdownload.cse.ucsc.edu/goldenPath/hg19/encodeDCC/wgEncodeUwHistone/wgEncodeUwHistoneSknshraH3k36me3StdHotspotsRep1.broadPeak.gz
SK-N-SH_RA	H3K4me3	UW	None	GSM945202	http://hgdownload.cse.ucsc.edu/goldenPath/hg19/encodeDCC/wgEncodeUwHistone/wgEncodeUwHistoneSknshraH3k4me3StdPkRep1.narrowPeak.gz
SK-N-SH_RA	H3K4me3	UW	None	GSM945202	http://hgdownload.cse.ucsc.edu/goldenPath/hg19/encodeDCC/wgEncodeUwHistone/wgEncodeUwHistoneSknshraH3k4me3StdHotspotsRep1.broadPeak.gz
SKMC	H3K4me3	UW	None	GSM945214	http://hgdownload.cse.ucsc.edu/goldenPath/hg19/encodeDCC/wgEncodeUwHistone/wgEncodeUwHistoneSkmcH3k04me3StdPkRep1.narrowPeak.gz
SKMC	H3K4me3	UW	None	GSM945214	http://hgdownload.cse.ucsc.edu/goldenPath/hg19/encodeDCC/wgEncodeUwHistone/wgEncodeUwHistoneSkmcH3k04me3StdHotspotsRep1.broadPeak.gz
U2OS	H3K36me3B	USC	None	GSM788076	http://hgdownload.cse.ucsc.edu/goldenPath/hg19/encodeDCC/wgEncodeSydhHistone/wgEncodeSydhHistoneU2osH3k36me3bUcdPk.narrowPeak.gz
U2OS	H3K9me3	USC	None	GSM788078	http://hgdownload.cse.ucsc.edu/goldenPath/hg19/encodeDCC/wgEncodeSydhHistone/wgEncodeSydhHistoneU2osH3k9me3UcdPk.narrowPeak.gz
WERI-Rb-1	H3K4me3	UW	None	GSM945263	http://hgdownload.cse.ucsc.edu/goldenPath/hg19/encodeDCC/wgEncodeUwHistone/wgEncodeUwHistoneWerirb1H3k04me3StdPkRep1.narrowPeak.gz
WERI-Rb-1	H3K4me3	UW	None	GSM945263	http://hgdownload.cse.ucsc.edu/goldenPath/hg19/encodeDCC/wgEncodeUwHistone/wgEncodeUwHistoneWerirb1H3k04me3StdHotspotsRep1.broadPeak.gz
WI-38	H3K4me3	UW	4OHTAM_20nM_72hr	GSM945215	http://hgdownload.cse.ucsc.edu/goldenPath/hg19/encodeDCC/wgEncodeUwHistone/wgEncodeUwHistoneWi38H3k04me3OhtamStdPkRep1.narrowPeak.gz
WI-38	H3K4me3	UW	4OHTAM_20nM_72hr	GSM945215	http://hgdownload.cse.ucsc.edu/goldenPath/hg19/encodeDCC/wgEncodeUwHistone/wgEncodeUwHistoneWi38H3k04me3OhtamStdHotspotsRep1.broadPeak.gz
WI-38	H3K4me3	UW	None	GSM945265	http://hgdownload.cse.ucsc.edu/goldenPath/hg19/encodeDCC/wgEncodeUwHistone/wgEncodeUwHistoneWi38H3k04me3StdPkRep1.narrowPeak.gz
WI-38	H3K4me3	UW	None	GSM945265	http://hgdownload.cse.ucsc.edu/goldenPath/hg19/encodeDCC/wgEncodeUwHistone/wgEncodeUwHistoneWi38H3k04me3StdHotspotsRep1.broadPeak.gz
